# Supplementary material for: Topic and sentiment in comments on diabetes-related Douyin short videos: a cross-sectional text-mining study
Source: Research Square preprint supplement (doi:10.21203/rs.3.rs-8464538/v1), 2026-02-02
Supplement: Supplementary file 1 [file 2ba8a5ecfeb820f659093e7c.docx]

**Supplementary Table S4. Topic distribution across the four dissemination quadrants.**

*Counts are shown as n (%), where percentages are calculated within each quadrant.*

| **Topic** | **Low-quality / Low-dissemination** | **Low-quality / High-dissemination** | **High-quality / Low-dissemination** | **High-quality / High-dissemination** | **Total** |
| --- | --- | --- | --- | --- | --- |
| 1 | 9 (2.07%) | 10 (2.36%) | 14 (2.62%) | 15 (2.44%) | 48 (2.39%) |
| 2 | 366 (84.33%) | 275 (65.01%) | 389 (72.71%) | 508 (82.60%) | 1,538 (76.63%) |
| 3 | 13 (3.00%) | 51 (12.06%) | 43 (8.04%) | 30 (4.88%) | 137 (6.83%) |
| 4 | 13 (3.00%) | 61 (14.42%) | 65 (12.15%) | 22 (3.58%) | 161 (8.02%) |
| 5 | 33 (7.60%) | 26 (6.15%) | 24 (4.49%) | 40 (6.50%) | 123 (6.13%) |
| **Total** | **434 (100%)** | **423 (100%)** | **535 (100%)** | **615 (100%)** | **2,007 (100%)** |

Note: Percentages represent the proportion of comments within each quadrant. Totals may not sum exactly due to rounding. Topic assignments are based on the same topic model applied to the full analytic corpus (n = 2,007).
