# Supplementary material for: Topic and sentiment in comments on diabetes-related Douyin short videos: a cross-sectional text-mining study
Source: Research Square preprint supplement (doi:10.21203/rs.3.rs-8464538/v1), 2026-02-02
Supplement: Supplementary file 2 [file 31bbc4b1364340628ab6ec36.xlsx]

## Sheet: S_Data
Comment_text	Sentiment_category	Comment_datetime	Topic_id	User_id_anon
农民的好总理[赞]	Neutral	2024-09-15 10:14:39	5	U0527
人民好总理	Neutral	2024-08-03 15:52:38	5	U3177
好总理，你为我们老百姓做了好事	Positive	2024-06-20 13:23:34	5	U2541
[爱心]愿你在天堂安好[比心]由衷感谢	Positive	2024-08-22 15:33:01	2	U2542
人民总理，为人民，人民永远怀念你	Neutral	2024-09-07 20:14:53	5	U2543
我们的好总理！[流泪]	Neutral	2024-08-24 19:14:24	5	U2544
人民怀念您[玫瑰][玫瑰][玫瑰]	Neutral	2024-09-18 01:50:21	2	U2545
人民好总理[赞][赞][赞]	Neutral	2024-08-23 22:09:53	5	U2546
好总理	Neutral	2024-09-23 20:44:52	5	U2547
真实的人民好总理[赞][赞][赞][玫瑰][玫瑰][玫瑰][感谢][感谢][感谢]	Neutral	2024-07-29 13:36:13	5	U2548
感谢有你，这个政策给4亿人带来了福音[赞]	Neutral	2024-08-23 13:14:34	2	U2549
人民好总理，人民怀念您！	Neutral	2024-08-03 10:38:37	5	U2550
永远怀念您[感谢]	Neutral	2024-08-26 20:40:04	2	U2551
人民好总理，我们想您	Neutral	2024-08-20 07:13:13	5	U2552
国之强！民之幸！	Neutral	2019-03-15 23:46:06	2	U2553
希望国家富起来能让大病重病的平民老百姓多报点吧！[感谢][感谢][感谢][感谢][感谢][感谢][感谢][感谢][感谢][感谢][感谢]	Neutral	2024-10-22 21:15:03	2	U2554
人民的好总理！[感谢][感谢][感谢]	Neutral	2024-08-28 15:54:28	5	U2555
怀念您，人民的好总理	Neutral	2024-08-02 19:07:03	5	U2556
人民的，老百姓的好总理一	Neutral	2024-08-19 06:47:09	5	U2557
我感动了，因为我妈有慢性糖尿病，真的是每天三顿都吃药	Neutral	2019-03-15 13:28:20	2	U2558
这次会议满满的干货啊！大赞！！！！	Positive	2024-09-27 11:22:50	2	U2559
好人	Positive	2024-09-17 21:50:11	2	U2560
向人民的好总理致敬！	Neutral	2024-08-17 20:33:00	5	U2561
百姓的好总理[赞][赞][赞]	Neutral	2024-08-26 20:36:44	5	U2562
没有健康就没有幸福，	Neutral	2019-03-19 17:54:35	2	U2563
好怀念您，好总理	Positive	2024-07-20 21:17:13	5	U2564
拥民护民爱民的好总理[流泪][流泪][流泪]	Neutral	2024-08-21 10:49:50	5	U2565
好总理，我们怀念您	Neutral	2024-08-03 18:33:24	5	U2540
国家政策越来越好了[送心]	Neutral	2019-03-16 00:34:28	2	U2538
iga肾病在国内全部省份一定要能申请慢性病	Neutral	2025-05-15 12:26:32	2	U2511
好总理[赞][赞]	Neutral	2024-09-03 20:24:58	5	U2537
人民好总理	Neutral	2024-08-28 10:16:28	5	U2512
哦，讲讲的好，要执行下去才是好的。	Neutral	2024-08-26 20:56:49	2	U2513
人民的好总理	Neutral	2024-08-25 00:27:00	5	U2514
白血病的算不算[捂脸]	Neutral	2024-08-24 21:49:01	2	U2515
人民的好总理[感谢][感谢][感谢]	Neutral	2024-08-21 02:39:05	5	U2516
好总理[赞]	Neutral	2024-08-20 14:32:20	5	U2517
好总理[流泪][流泪][流泪]	Neutral	2024-08-19 10:28:31	5	U2518
报50%.	Neutral	2024-08-18 23:23:36	2	U0005
[流泪][流泪][流泪]很想总理，人民好总理	Neutral	2024-08-18 21:48:32	5	U2519
能报销的地方贵直接药店买便宜还省去了麻烦	Neutral	2024-08-14 08:32:24	2	U2520
人民的好总理[感谢][感谢][感谢][感谢]	Neutral	2024-08-12 17:22:41	5	U2521
中国人民的好总理[赞][赞][赞]	Neutral	2024-08-12 10:58:00	5	U2522
人民的好总理	Neutral	2024-08-11 20:18:35	5	U2523
人民的好总理，怀念你	Neutral	2024-08-11 20:18:17	5	U2524
中国人民的好总理[感谢][感谢][感谢][感谢][感谢]	Neutral	2024-08-08 14:42:47	5	U2525
好总理	Neutral	2024-08-08 13:14:19	5	U0111
人民的好总理	Neutral	2024-08-08 08:08:27	5	U2526
怀念您！	Neutral	2024-08-07 19:23:52	2	U2527
人民好总理	Neutral	2024-08-04 17:01:33	5	U2528
人民好总理[感谢][感谢]	Neutral	2024-08-04 12:54:47	5	U2529
好总理[赞][赞][赞]	Neutral	2024-08-04 10:58:29	5	U2530
感谢人民好总理[赞]	Neutral	2024-08-03 09:38:02	5	U2531
好总理	Neutral	2024-08-03 07:48:02	5	U2532
好总理[感谢][感谢][感谢]	Neutral	2024-08-02 18:36:56	5	U2533
我们这里为什么要同时患上高血压和糖尿病才能办慢性病	Neutral	2024-07-26 15:03:45	2	U2534
怀念我们的好总理！！！	Neutral	2024-07-25 12:14:17	5	U2535
好总理啊	Neutral	2024-07-25 11:09:51	5	U2536
没有健康就没有国家	Neutral	2024-07-16 20:28:53	2	U2566
人民的好总理[流泪][流泪][流泪]	Neutral	2024-07-15 10:17:30	5	U2539
人民的好总理[感谢]	Neutral	2024-06-30 21:41:20	5	U2567
我是高血压引起的视网膜静脉阻塞，黄斑水肿在南京鼓楼看的，跨省只能报30%	Neutral	2024-06-29 09:27:33	2	U2597
感动	Neutral	2019-03-31 12:56:11	2	U2599
好样的	Positive	2019-03-30 22:35:48	2	U2600
好一句 没有健康就没有幸福 [赞][赞]	Neutral	2019-03-30 19:03:38	2	U2601
帅，感谢感谢	Neutral	2019-03-30 17:29:09	2	U2602
好人呐	Positive	2019-03-30 16:07:18	2	U2603
没有健康就没有幸福	Neutral	2019-03-27 11:37:00	2	U2604
年轻时候多注意锻炼啊	Neutral	2019-03-27 09:30:53	2	U2605
[鼓掌][鼓掌][鼓掌]	Neutral	2019-03-27 07:52:46	2	U2606
所以啊，自己也要注意身体，戒烟戒酒少油腻少熬夜，多锻炼！	Neutral	2019-03-26 11:22:16	2	U2607
[小鼓掌][小鼓掌][小鼓掌]	Neutral	2019-03-26 11:13:41	2	U2608
爱我中华	Neutral	2019-03-26 09:18:40	2	U2609
谢谢，我伟大的祖国	Neutral	2019-03-25 23:20:54	2	U2610
我妈都是高血压糖尿病患者，一直都有的报销，是农村的新农合医保报销的，不错，感谢国家感谢党[呲牙]	Neutral	2019-03-25 22:55:06	2	U2611
健康是最大的财富！	Neutral	2019-03-25 17:44:21	2	U2612
政策现在好了。我也是高血压，想知道怎么办，在哪里办这个事？	Neutral	2019-03-25 16:54:22	2	U2613
[鼓掌][鼓掌][鼓掌]	Neutral	2019-03-21 23:08:19	2	U2614
终于关注民生了，点赞！	Neutral	2019-03-21 22:33:33	2	U2615
政策越来越好了	Neutral	2019-03-21 20:27:36	2	U2616
中国我爱您	Neutral	2019-03-21 16:29:49	2	U2617
真棒	Positive	2019-03-20 23:14:37	2	U2618
没有健康就没有幸福[小鼓掌]	Neutral	2019-03-20 00:10:59	2	U2619
真好	Neutral	2019-03-19 19:08:45	2	U2620
棒棒哒	Positive	2019-03-19 12:18:19	2	U2621
[鼓掌][鼓掌]	Neutral	2019-03-19 10:36:12	2	U2622
[赞][赞][赞][赞]	Neutral	2019-03-19 08:06:46	2	U0003
中国越来越好，好幸福	Neutral	2019-03-19 07:44:21	2	U2623
支持	Neutral	2019-03-19 03:59:54	2	U2598
民声	Neutral	2019-03-18 22:56:58	2	U2596
[赞][赞][赞][赞][赞]	Neutral	2019-03-18 21:34:16	2	U2569
感谢	Neutral	2019-03-18 20:58:00	2	U2595
给力！	Neutral	2019-03-18 20:54:03	2	U2570
[赞]	Neutral	2019-03-18 18:29:07	2	U2571
看哭了	Neutral	2019-03-18 16:22:25	2	U2572
[赞][赞][赞]	Neutral	2019-03-18 15:31:18	2	U2573
国之强！民之幸！	Neutral	2019-03-18 01:25:13	2	U2574
[赞][赞][赞][鼓掌][鼓掌][鼓掌]	Neutral	2019-03-17 23:19:57	2	U2575
[赞][赞][赞][赞][赞][赞][赞][赞]	Neutral	2019-03-17 22:10:49	2	U2576
为那些得到帮助的人民感谢祖国……希望祖国更繁荣昌盛	Neutral	2019-03-18 01:07:57	2	U2577
[鼓掌][鼓掌][鼓掌][鼓掌][鼓掌][鼓掌][鼓掌]	Neutral	2019-03-17 23:10:50	2	U2578
给你👏👏👏👏👏	Neutral	2019-03-17 21:47:06	2	U2579
国家越来越好了	Neutral	2019-03-17 21:42:14	2	U2580
谢谢您	Neutral	2019-03-17 21:09:20	2	U2581
支持你	Neutral	2019-03-17 21:04:26	2	U2582
祖国强大了	Neutral	2019-03-17 20:51:13	2	U2583
国家越来越好，人民越来越幸福，点赞	Neutral	2019-03-17 20:05:42	2	U2584
说的太好啦，沒有健康就没有幸福[赞][赞]	Neutral	2019-03-17 19:48:22	2	U2585
👍👍👍👍👏👏👏👏👏👏	Neutral	2019-03-17 19:35:38	2	U2586
没有健康就没有幸福	Neutral	2019-03-17 19:07:05	2	U2587
此处应该有掌声	Neutral	2019-03-17 18:22:09	2	U2588
好好好👏	Positive	2019-03-17 18:19:58	2	U2589
伟大祖国，繁荣昌盛。	Neutral	2019-03-17 18:13:12	2	U2590
[鼓掌][鼓掌][鼓掌][鼓掌][鼓掌]	Neutral	2019-03-17 18:00:25	2	U2591
好，	Neutral	2019-03-17 17:58:47	2	U2592
[赞]	Neutral	2019-03-17 17:37:26	2	U2593
祖国我爱你	Neutral	2019-03-17 17:36:25	2	U2594
国家现在富裕了，祖国越来越好	Neutral	2019-03-17 17:08:34	2	U2568
支持。我妈也是难受了才吃。	Neutral	2019-03-17 16:19:17	2	U2510
感谢国家，我爱我国	Neutral	2019-03-17 16:11:47	2	U2509
国富民强	Neutral	2019-03-17 15:35:47	2	U2508
[鼓掌][鼓掌][鼓掌]	Neutral	2019-03-17 15:19:49	2	U2425
谢谢你	Neutral	2019-03-17 15:00:22	2	U2426
国家政策越来越好了。	Neutral	2019-03-17 14:18:04	2	U2427
大爱！	Neutral	2019-03-17 14:13:49	2	U2428
点赞👍真棒呀	Neutral	2019-03-17 13:55:18	2	U2429
感谢祖国	Neutral	2019-03-17 13:53:29	2	U2430
点个赞 感谢总理	Neutral	2019-03-17 13:25:11	2	U2431
👏👏👏👏👏说的太好	Neutral	2019-03-17 12:57:06	2	U2432
必须赞	Neutral	2019-03-16 13:45:34	2	U2433
掌声送给你，	Neutral	2019-03-16 02:16:41	2	U2434
他怎么越来越帅	Neutral	2019-03-16 01:16:18	2	U2435
好	Neutral	2019-03-16 00:28:12	2	U2436
我们的国家越来越好了	Neutral	2019-03-16 00:21:42	2	U2437
为祖国点赞	Neutral	2019-03-16 00:09:47	2	U2438
给力	Neutral	2019-03-16 00:07:08	2	U2439
贴近民生	Neutral	2019-03-15 23:57:30	2	U2440
支持	Neutral	2019-03-15 23:54:52	2	U2441
谢谢[祈祷][祈祷][祈祷]	Neutral	2019-03-15 23:41:01	2	U2442
给力👍	Neutral	2019-03-15 23:39:13	2	U2443
谢谢，祖国的强大	Neutral	2019-03-15 23:34:17	2	U2444
愿祖国繁荣昌盛！[赞][赞][赞][鼓掌][鼓掌]	Neutral	2019-03-15 23:22:02	2	U2445
感谢党的政策越来越好，感恩[鼓掌][鼓掌][鼓掌]	Neutral	2019-03-15 23:13:02	2	U2446
好！	Neutral	2019-03-15 23:09:14	2	U2447
谢谢[赞][赞][赞][赞]	Neutral	2019-03-15 23:04:30	2	U2448
很好了	Neutral	2019-03-15 23:02:18	2	U2449
振奋人心啊！[赞][赞][赞][赞]	Neutral	2019-03-15 22:59:16	2	U2424
祖国会越来越好	Neutral	2019-03-15 22:53:24	2	U2423
祖国越来越好了[赞][赞][赞]	Neutral	2019-03-15 22:47:48	2	U2422
祖国越来越好！民生问题得到更加重视！	Neutral	2019-03-15 22:46:50	2	U2421
我爱我的国 民生问题解决在实际上	Neutral	2019-03-15 22:46:41	2	U2395
[赞][赞][赞][赞][赞]	Neutral	2019-03-15 22:45:15	2	U2396
暖心	Neutral	2019-03-15 22:44:41	2	U2397
人民生活越来越有幸福感[赞]	Neutral	2019-03-15 22:44:25	2	U2398
祖国政策越来越好，感恩[祈祷][祈祷][祈祷][祈祷]	Neutral	2019-03-15 22:43:35	2	U2399
此生不悔入华夏	Neutral	2019-03-15 22:42:15	2	U2400
祖国，强大	Neutral	2019-03-15 22:41:07	2	U2401
好样的	Positive	2019-03-15 22:38:19	2	U2402
好事	Positive	2019-03-15 22:36:51	2	U2403
这个非常好，现在虽然有了，可是我的姥姥再也用不到了。	Neutral	2019-03-15 22:35:03	2	U2404
鼓掌👏	Neutral	2019-03-15 22:34:05	2	U2405
👍👍👍	Neutral	2019-03-15 22:32:17	2	U2406
讲的太对了[赞][赞][赞]	Neutral	2019-03-15 22:31:43	2	U2394
👍👍👍	Neutral	2019-03-15 22:30:59	2	U2407
[赞][赞][赞]	Neutral	2019-03-15 22:29:33	2	U2409
[鼓掌][鼓掌][鼓掌][鼓掌][鼓掌]	Neutral	2019-03-15 22:29:05	2	U0037
[赞][赞][赞][赞][鼓掌]	Neutral	2019-03-15 22:27:19	2	U2410
👍👍👍👍👍祖国越来越好	Neutral	2019-03-15 22:23:35	2	U2411
祖国越来越好	Neutral	2019-03-15 22:16:11	2	U2412
掌声[赞]	Neutral	2019-03-15 22:13:34	2	U2413
好政策点赞	Neutral	2019-03-15 22:09:37	2	U2414
祖国，[送心]	Neutral	2019-03-15 22:06:28	2	U2415
[赞][赞][赞]	Neutral	2019-03-15 21:54:12	2	U2416
👍🏻👍🏻👍🏻👍🏻 真棒呀	Neutral	2019-03-15 21:53:42	2	U2417
谢谢，谢谢	Neutral	2019-03-15 21:51:19	2	U2418
[赞][赞][赞][赞]	Neutral	2019-03-15 21:49:53	2	U2419
[鼓掌][鼓掌][鼓掌][鼓掌]	Neutral	2019-03-15 21:47:08	2	U2420
[爱慕]	Neutral	2019-03-15 21:42:35	2	U2450
此处有掌声👏👏👏👏	Neutral	2019-03-15 21:41:29	2	U2451
[鼓掌][鼓掌]	Neutral	2019-03-15 21:35:15	2	U2452
祖国会越来越好的	Neutral	2019-03-15 21:34:01	2	U2481
👍👍👍👍👍祖国越来越好	Neutral	2019-03-15 21:31:50	2	U2483
[小鼓掌][小鼓掌][小鼓掌][小鼓掌]	Neutral	2019-03-15 21:30:31	2	U2484
[比心][比心][比心][比心]	Neutral	2019-03-15 21:28:28	2	U2485
好事	Positive	2019-03-15 21:28:24	2	U2486
[鼓掌][鼓掌][鼓掌][鼓掌][鼓掌]	Neutral	2019-03-15 21:22:30	2	U2487
厉害了我的国家	Neutral	2019-03-15 21:21:34	2	U2488
谢谢	Neutral	2019-03-15 21:19:16	2	U2489
好消息	Positive	2019-03-15 21:17:06	2	U2490
热泪盈眶！我为我的祖国而骄傲！	Neutral	2019-03-15 21:15:43	2	U2491
热泪盈眶	Neutral	2019-03-15 21:00:29	2	U2492
[赞]	Neutral	2019-03-15 20:58:43	2	U2493
热泪盈眶	Neutral	2019-03-15 20:56:32	2	U2494
正能量	Neutral	2019-03-15 20:55:19	2	U2495
[赞][赞][赞][赞][赞][赞][鼓掌][鼓掌][鼓掌][鼓掌][鼓掌][鼓掌][666][666][666][666]	Neutral	2019-03-15 20:53:00	2	U2496
[赞][赞][赞]	Neutral	2019-03-15 20:51:03	2	U2497
真好，👍👍👍没有健康，就没有幸福。	Neutral	2019-03-15 20:45:29	2	U2498
一点一点都会好起来的[赞][赞][赞]	Neutral	2019-03-15 20:44:35	2	U2499
真心为人民着想	Neutral	2019-03-15 20:44:02	2	U2500
什么方式报销	Neutral	2019-03-15 20:41:03	2	U2501
[赞][赞][赞][赞]	Neutral	2019-03-15 20:34:52	2	U2502
@神经科黄医生 我老婆[呲牙]	Neutral	2023-05-18 16:45:37	2	U2503
你说的这个指标是确诊糖尿病人的的指标吧，我空腹5.8都诊断耐糖受损了，餐后1个小时9.0两个小时7.9，医生说我耐糖量受损，需要控制饮食。 和你这说的有点不一样哦	Neutral	2023-05-19 15:34:10	2	U2504
请问一下医生，我老公59岁，有糖尿病，上了半个月的晚班，今天早上查到7.7算不算高，是不是有点偏高呀？明天不上晚班又查一次	Neutral	2025-09-21 05:30:25	2	U2505
	Neutral	2023-06-02 10:01:22	2	U2506
刘家飞	Neutral	2025-11-25 08:55:32	2	U2507
吃饼干12.4	Neutral	2025-11-21 11:30:56	2	U2482
早上空腹。	Neutral	2023-08-16 09:42:45	2	U2480
饭后三小时量的	Neutral	2023-06-07 18:25:13	2	U2453
我现在五点多了	Neutral	2025-12-02 09:17:21	2	U0039
@百姓好醫生∴彡	Neutral	2025-10-28 20:56:48	2	U2479
[流泪][流泪]小孩子，	Neutral	2023-08-11 15:56:14	2	U2454
[捂脸]	Neutral	2025-11-21 22:30:53	2	U2455
二型路过之前16现在5左右了	Neutral	2025-09-10 15:08:10	2	U2456
[赞][赞][赞]	Neutral	2025-10-18 20:01:19	2	U2457
饭后三小时6.1	Neutral	2025-11-16 21:14:53	2	U2458
[666][666][色][色][玫瑰][玫瑰]	Neutral	2025-07-13 16:30:08	2	U2459
我餐二17.9	Neutral	2025-09-05 17:26:51	2	U2460
40岁	Neutral	2025-11-27 11:05:06	2	U2461
[赞][赞][赞][赞]	Neutral	2025-08-29 06:41:28	2	U2462
[赞][赞][赞]	Neutral	2025-10-16 11:13:28	2	U2463
利利索索的说出来[玫瑰][玫瑰][玫瑰][玫瑰]，谢谢	Neutral	2025-08-02 16:01:19	2	U2464
餐后4.6	Neutral	2025-09-02 11:28:38	2	U2465
一打开你的视频，什么都没看，都没听，就会先点赞，然后会把它听下去，看下去，看完就是完播。	Neutral	2023-05-19 09:43:26	2	U2466
夫妻俩棒棒滴，给老百姓普及医学知识。必须点赞！[赞][赞][赞][赞][赞][比心][比心][比心][比心][比心]	Positive	2023-05-18 19:14:02	2	U2467
你讲有点混乱	Neutral	2025-10-11 23:27:42	2	U2468
你俩夫妻？	Neutral	2025-10-10 09:04:55	2	U2469
我这个咋样[抱拳]	Neutral	2025-10-07 22:43:01	2	U2470
[感谢][感谢][感谢][感谢][爱心][爱心]	Neutral	2025-10-03 01:42:45	2	U2471
6.7血糖算高吗？	Neutral	2025-09-30 09:05:45	2	U2472
[爱心][爱心][爱心][爱心][爱心]	Neutral	2025-09-27 14:24:03	2	U2473
晚饭后7.6是糖尿病吗？	Neutral	2025-09-26 22:28:28	2	U2474
连续空腹测两天，7.1	Neutral	2025-09-26 06:23:32	2	U2475
刚吃俩鸡蛋，两段玉米，中午饭后高了，吓得晚上不敢吃[流泪]这个病天天半饥六饿的[流泪][流泪][流泪][流泪]	Neutral	2025-09-25 18:10:32	2	U0016
@莉宝啊 [疑问]	Neutral	2025-09-16 13:55:04	2	U2476
我餐后半小时4.7正常吗？	Neutral	2025-09-16 01:31:00	2	U2477
@[赞][赞][赞][赞][赞]	Neutral	2025-09-15 14:29:46	2	U2478
	Neutral	2025-09-13 17:34:32	2	U2624
我昨晚12点饿了，吃了一碗螺蛳粉，早上空腹就7.0了[捂脸]真的血糖高不能乱吃一点，控制的好累啊。	Neutral	2025-09-12 12:38:36	2	U2625
饭后2小时血糖8 ．1算高吗	Neutral	2025-09-10 21:15:21	2	U2626
[比心][比心][比心][比心]谢谢分享	Neutral	2025-09-10 16:50:03	2	U2742
真的吗	Neutral	2025-09-09 10:05:57	2	U2773
点赞点赞点赞点赞	Positive	2025-09-07 11:48:06	2	U2774
餐二14.8	Neutral	2025-09-02 15:17:38	2	U2775
[流泪][流泪][流泪]	Neutral	2025-09-01 15:43:31	2	U2776
我一个二十多还没到30就tm 血糖了 8.9	Neutral	2025-08-31 18:43:13	2	U2777
33.9	Neutral	2025-08-31 15:04:57	2	U2778
[玫瑰][玫瑰][玫瑰]	Neutral	2025-08-30 11:37:51	2	U2779
	Neutral	2025-08-29 19:29:13	2	U2780
空腹6.8是不是也有点高	Neutral	2025-08-24 13:08:30	2	U2781
空腹4.8可以吗	Neutral	2025-08-20 13:24:24	2	U2782
@勇☀️哥 你注意点	Neutral	2025-08-18 12:07:24	2	U2783
黄叫兽	Neutral	2025-08-17 14:12:47	2	U2784
餐后6.6	Neutral	2025-08-15 11:19:43	2	U2785
7，1算高不	Neutral	2025-08-14 11:14:24	2	U2786
2⃣️塘路过[快哭了][快哭了] 3年前17现在5.3谁还高 告诉我 当行好事了[耶][耶]	Positive	2025-08-10 21:25:41	2	U2787
谢谢黄教授你老婆[赞]	Neutral	2025-08-07 09:57:41	2	U2788
非常好的知识。	Neutral	2025-08-06 18:27:09	2	U2789
[赞][赞][赞]	Neutral	2025-08-06 13:08:18	2	U2790
老师，我空腹7.7歺后8.8需用药！以是控制饮食了	Neutral	2025-08-05 12:11:31	2	U2791
空腹6.456都有，还是要控制	Neutral	2025-07-29 11:23:45	2	U2792
这么年轻就教授了？[捂脸]	Neutral	2025-07-24 11:12:42	2	U2793
良心慈善正能量难得的夫妻好医生[赞][赞][赞]	Neutral	2025-07-15 11:50:23	2	U2794
上面是床吗	Neutral	2025-01-12 22:15:59	2	U2795
为啥设置？既然在正能量的直播为啥不让转发呢	Neutral	2024-06-15 17:26:51	2	U2796
[玫瑰][玫瑰][玫瑰]	Neutral	2024-06-05 19:28:24	2	U2797
[赞][赞][赞][赞][赞]	Neutral	2024-03-25 12:50:03	2	U2772
[赞][赞][赞][赞][赞][赞][赞][赞][赞][赞][赞][赞][赞][赞][赞][赞][玫瑰][玫瑰][玫瑰][玫瑰][玫瑰][玫瑰][玫瑰][玫瑰][玫瑰][玫瑰][玫瑰][玫瑰][玫瑰][玫瑰][玫瑰][玫瑰][玫瑰][玫瑰]	Neutral	2023-12-09 06:22:19	2	U2770
	Neutral	2023-11-30 20:51:22	2	U2743
[赞][赞][赞][赞][赞][赞][赞][赞][赞]	Neutral	2023-11-05 18:13:18	2	U2769
餐后血糖18.4	Neutral	2023-10-19 20:56:42	2	U2744
只有2.9，正常	Neutral	2023-10-18 08:40:40	2	U2745
黄教授说的很好，我天天看	Neutral	2023-10-17 21:46:54	2	U2746
我空腹6.7好害怕啊。我妈和外婆是糖尿病[捂脸]。	Neutral	2023-10-17 08:19:18	2	U0029
[赞][赞][赞]	Neutral	2023-10-16 15:29:57	2	U2747
[感谢][感谢][感谢]	Neutral	2023-10-15 14:50:54	2	U2748
你说的是餐后还是空腹？	Neutral	2023-10-13 21:31:59	2	U2749
[赞][赞]	Neutral	2023-10-13 13:27:48	2	U2750
晚上12.20，才给我妈测了一下血糖，32.9，已经饭后4小时了，喊她打了5个单位控制一下。	Neutral	2023-10-12 00:24:15	2	U2751
[赞][赞][赞][赞]	Neutral	2023-10-10 18:48:46	2	U2752
[比心][比心][比心]非常专业	Neutral	2023-10-09 10:40:40	2	U2753
好医生	Neutral	2023-10-06 13:38:47	3	U2754
我每天早上量空腹7点1饭后9点5每天量	Neutral	2023-10-05 12:12:13	2	U2755
正常是多少	Neutral	2023-10-04 10:06:08	2	U2756
[666][666][666]	Neutral	2023-10-03 05:27:27	2	U2757
[赞][赞][赞][赞][赞][玫瑰][玫瑰][玫瑰][玫瑰][玫瑰][玫瑰]	Neutral	2023-10-02 17:20:10	2	U2758
我午饭后4小时测血糖，常年血糖在3.3到3.4之间，有时甚至更低。[捂脸]我生酮饮食。血酮2.0左右。每周会做30分钟左右的力量训练，一般1分钟可以做50个标准俯卧撑。这个健康吗？	Neutral	2023-10-02 17:13:36	2	U0011
毫摩尔每升你都不说[捂脸]	Neutral	2023-09-29 09:17:15	2	U2759
我餐后 4.8，天天 2 瓶可乐，矿泉水一天在 3 到 5 斤[捂脸][捂脸][捂脸]	Neutral	2023-09-26 20:13:53	2	U2760
[666][666][666]	Neutral	2023-09-24 15:24:19	2	U2761
怀孕空腹血糖测了 吃完饭一个小时能不能再测	Neutral	2023-09-24 08:24:07	2	U2762
中国好医生[赞][赞][赞]	Neutral	2023-09-23 20:57:07	3	U2763
[赞][赞][赞][赞][赞][赞]	Neutral	2023-09-22 20:17:35	2	U0020
我都6.8了	Neutral	2023-09-21 19:07:45	2	U2764
[赞][赞][赞][赞][赞][鼓掌]	Neutral	2023-09-19 22:10:26	2	U2765
今年空腹四个小时4.8 去年空腹10个小时4.4	Neutral	2023-09-19 16:58:08	2	U2766
空腹4-7都是正常的？[疑问][尬笑][尬笑][尬笑]	Neutral	2023-09-17 23:28:44	2	U2767
[鼓掌][赞][比心]	Neutral	2023-09-17 15:22:35	2	U2768
推广和人寿p'sspppppppppspsppsjtttptpppssppsppptpp-gg哈哈哈 哈哈就来了他健健康康哦哦哦哦哦。 呃呃呃呃呃呃呃呃呃呃呃呃呃默默 莫呃呃呃呃呃呃^_^	Neutral	2023-09-17 00:58:34	2	U2798
看日期时间	Neutral	2023-09-14 21:34:09	2	U2771
空腹不应该是5点多到6.1是正常的嘛？	Neutral	2023-09-14 12:05:45	2	U2799
空腹5.6餐后13.8好吓人	Neutral	2023-09-12 12:56:21	2	U2829
刚刚买了个测试一下，血糖5。	Neutral	2023-09-11 08:59:54	2	U2831
@满山的猴子我腚最红🐷	Neutral	2023-09-11 08:20:57	2	U2832
这些症状我都有，就是没有饥饿感	Neutral	2023-09-10 08:31:44	2	U2833
	Neutral	2023-09-09 10:00:26	2	U2834
[赞][赞][赞]	Neutral	2023-09-08 06:15:00	2	U2835
餐后6.9	Neutral	2023-09-06 11:26:42	2	U2836
哭死，餐后二小时11.6，然后快走四十分钟，睡前（餐后四小时）6.2[流泪]头晕[流泪]	Neutral	2023-09-05 22:56:07	2	U2837
正常人呢	Neutral	2023-09-01 23:52:06	2	U2838
这么重要的事情，你俩不能严肃😠的做下来说吗[灵机一动]	Neutral	2023-09-01 23:07:43	2	U2839
[赞][赞][赞][赞]	Neutral	2023-09-01 09:56:03	2	U2840
餐后血糖11.7[躺平][躺平][躺平]很害怕	Neutral	2023-09-08 12:53:50	2	U2841
讲的最清楚[赞][赞][赞]	Neutral	2023-08-30 20:24:47	2	U2842
空腹血糖4.6餐后血糖4.1，吃完东西为什么会更低……[泪奔]	Neutral	2023-08-29 15:58:08	2	U2843
我爸二型糖尿病，今天早上刚测是6点多，体重维持的也还可以，每天我爸上班都会上楼梯，晚上早上都会溜十分钟狗	Neutral	2023-08-28 13:28:03	2	U2844
@	Neutral	2023-08-26 17:02:46	2	U2845
空腹 4.5-6.0，餐后 8.8-10[流泪]	Neutral	2023-08-25 15:18:21	2	U2846
为好医生点赞，谢谢老师夫妻俩[比心][比心][比心]	Neutral	2023-08-24 09:46:38	3	U0058
空腹正常，有时餐后12.9，有时8.9	Neutral	2023-08-23 22:13:55	2	U2847
[赞][赞][赞]	Neutral	2023-08-23 08:34:31	2	U2848
我的早上空腹在医院抽血测的，葡萄糖6.94。糖化血糖4.71	Neutral	2023-08-22 16:14:09	2	U2849
[赞][赞][赞]	Neutral	2023-08-22 07:12:00	2	U2850
	Neutral	2023-08-21 17:11:31	2	U0017
刚测了一下饭后23.4	Neutral	2023-08-21 09:49:23	2	U2851
我685体检不合格	Neutral	2023-08-19 15:24:43	2	U2852
[恐惧]	Neutral	2023-08-17 06:49:23	2	U0087
你说的不对，空腹5.8就是血糖异常[打脸][打脸][打脸][打脸]	Neutral	2023-08-15 10:51:41	2	U2853
早上刚测了空腹6.9，[捂脸][捂脸][捂脸]	Neutral	2023-08-13 12:28:43	2	U2854
受益	Neutral	2023-08-13 00:47:26	2	U2855
[赞][赞][赞]	Neutral	2023-08-12 14:22:21	2	U2830
@谢谢老师的分享[玫瑰][玫瑰][玫瑰][赞][赞][赞][赞]	Neutral	2023-08-12 04:43:28	2	U2828
我当时血糖1.9，给我测的医护人员都惊呆了，赶紧给我葡萄糖，怕我晕了	Neutral	2023-08-11 16:01:24	2	U2801
我这个呢 主任	Neutral	2023-08-09 19:18:03	2	U2827
眼角有点麻是不是高了啊	Neutral	2023-08-08 10:51:27	2	U0089
我的2.7是不是低了呀	Neutral	2023-08-07 22:56:08	2	U2802
我空腹血糖11	Neutral	2023-08-07 16:31:12	2	U2803
@Wink 这个医生说空腹7.0以内都正常[捂脸][捂脸]	Neutral	2023-08-05 15:53:22	3	U2804
餐前血糖5左右心慌心悸，餐后10左右氵殳感觉！	Neutral	2023-08-03 12:33:01	2	U2805
说的很清楚了，长知识了。[赞][赞][赞]	Neutral	2023-08-03 09:00:04	2	U2806
[比心]	Neutral	2023-08-02 21:16:56	2	U2807
[赞][赞][赞][赞][玫瑰][玫瑰][玫瑰][玫瑰][鼓掌][鼓掌][鼓掌][鼓掌]	Neutral	2023-08-01 16:42:11	2	U2808
我妈管不住嘴，昨天血糖太高在家昏迷了到医院都三十点多，直接抢救室抢救，然后住重症监护，已经发生多次了，都不长记性，弄的这两年我们都是提心掉胆的，我每次去他家见她吃甜的就说她，有时候还跟她夺，她老是说我自己的身体我知道，吃一点没事，我爸也说没事，她喝着黑茶呢就没事，我说那茶真神奇能治百病那你还吃药干啥，啥也不用吃，光喝茶吧，以后生病不用上医院喝你的茶就行，他俩都不听，我妈还偷偷出去买着吃，还买果冻，吃甜瓜，昨天就是因为吃个甜瓜血压飙到30多，在家昏迷了，几次重症监护我们都快吃不消了，就这她也不长记性，还有吃药喝黑茶，我说茶解药，她非说这茶不解，哎……	Neutral	2023-08-01 07:02:45	2	U2809
	Neutral	2023-08-21 17:11:28	2	U0017
我餐后4.1也很苦恼	Neutral	2023-07-31 17:46:30	2	U2810
[赞][赞][赞][赞][赞]	Neutral	2023-07-29 16:55:55	2	U2811
[鼓掌]	Neutral	2023-08-17 06:49:13	2	U0087
空腹2.4[发呆]	Neutral	2023-07-29 14:50:50	2	U2812
[赞][赞][赞][赞][赞][一起加油][感谢][感谢][感谢][感谢]	Neutral	2023-07-27 23:14:17	2	U2813
[赞][赞][赞][赞]	Neutral	2023-07-27 18:41:36	2	U2814
[捂脸][捂脸][捂脸]	Neutral	2023-07-27 18:07:41	2	U2815
[赞][赞][爱心][爱心][呲牙][呲牙]	Neutral	2023-07-27 16:07:12	2	U2816
[赞][赞][大笑][赞]	Neutral	2023-07-27 16:06:51	2	U2817
实话[赞]	Neutral	2023-07-27 15:46:31	2	U2818
请问心慌是不是糖高了啊	Neutral	2023-08-08 10:50:57	2	U0089
[一起加油][一起加油][一起加油][一起加油][一起加油][一起加油]	Neutral	2023-07-27 14:50:11	2	U2819
[赞][赞][赞][赞][赞][赞][气球][气球]	Neutral	2023-07-27 14:32:28	2	U2820
13.9指的是餐前还是餐后？说清楚点	Neutral	2023-07-27 13:46:54	2	U2821
[赞][爱心][爱心][爱心]	Neutral	2023-07-27 12:07:34	2	U2822
[赞][赞][赞]	Neutral	2023-07-27 12:07:22	2	U2823
[赞][赞][赞][赞][赞][赞][赞][赞]	Neutral	2023-07-27 12:06:07	2	U2824
[赞][赞][赞]	Neutral	2023-07-27 11:52:37	2	U2825
空腹血糖6.4	Neutral	2023-07-26 15:10:26	2	U2826
	Neutral	2023-08-21 17:11:22	2	U0017
[赞][赞][赞]	Neutral	2023-07-26 13:51:23	2	U2800
[666][666][666]	Neutral	2023-07-25 12:54:17	2	U2741
[赞][赞][赞][赞]	Neutral	2023-07-24 02:12:16	2	U2684
谢谢黄教授！[感谢][感谢][感谢]	Neutral	2023-07-23 17:02:26	2	U2740
良心医生[赞]	Neutral	2023-07-22 10:32:52	3	U2657
[赞][赞][赞][鼓掌][鼓掌]	Neutral	2023-07-24 21:05:45	2	U0013
这个月突然瘦了10斤，一测血糖14.2了[流泪][流泪]	Neutral	2023-07-21 18:53:30	2	U2658
说的比较中肯且切合实际[鼓掌][鼓掌]	Neutral	2023-07-18 16:47:02	2	U2659
夫妻相	Neutral	2023-07-18 12:46:44	2	U2660
	Neutral	2023-07-17 13:58:07	2	U2661
空腹7.4	Neutral	2023-07-17 11:03:29	2	U2662
饭后俩小时5.8，第二天空腹4.8。	Neutral	2023-07-16 09:20:47	2	U2663
[赞][赞][赞][玫瑰][玫瑰][玫瑰]	Neutral	2023-07-14 19:55:02	2	U2664
[赞][赞][赞]	Neutral	2023-07-13 20:33:37	2	U2665
为好医生点赞[赞][赞][赞]	Neutral	2023-07-13 14:18:09	3	U2666
我空腹3.9	Neutral	2023-07-12 23:59:48	2	U2667
给老师点赞[赞][玫瑰]	Neutral	2023-07-12 05:18:35	2	U2668
[赞][赞][赞]	Neutral	2023-07-11 11:42:03	2	U2669
我餐后26.8，空腹15.2，现在餐后6到10，空腹6到7点多	Neutral	2023-07-08 14:45:59	2	U2670
漂亮的好医生。[赞][赞][赞][赞][赞][赞]	Positive	2023-07-07 21:12:33	3	U2671
	Neutral	2023-07-06 22:52:57	2	U2672
糖尿病人餐后血糖九点多，但是没吃药	Neutral	2023-07-05 18:45:36	2	U2673
夫妻相啊[赞][赞][赞]优秀优秀[赞][赞][赞]	Positive	2023-07-05 16:36:00	2	U0100
	Neutral	2023-07-05 14:33:29	2	U2674
好医生[赞][赞][赞][赞]	Neutral	2023-07-05 07:36:03	3	U2675
说的是空腹还是饭后啊	Neutral	2023-07-04 18:10:39	2	U2676
[赞][赞][赞]	Neutral	2023-07-04 13:54:48	2	U2677
说的很好知道了[赞][赞][赞][赞][赞][赞]	Neutral	2023-07-03 05:22:57	2	U2678
餐后两小时3.8，刚恶心，心慌	Negative	2023-07-02 13:32:19	2	U2679
你老婆那么年轻就是教授了[赞][赞][赞]	Neutral	2023-07-02 09:50:36	2	U2680
@一只小婷婷🍓👧	Neutral	2023-07-01 22:33:12	2	U2681
我的空腹是7.4。	Neutral	2023-07-01 06:48:01	2	U2656
适量可控 一型对饮食没有那么严格的限制 当然配合剂量带上动态实时观察血糖（有些时候拍出来的和朋友一起吃的量 也没有那么多[眼含热泪]	Neutral	2024-03-15 17:53:38	2	U0103
长效用的是篮星人无针注射器！	Neutral	2024-03-15 21:39:10	2	U0103
你长效打的哪个啊	Neutral	2025-11-13 20:11:27	2	U2654
的你这你这探头 装那个位置？	Neutral	2024-03-27 11:28:48	2	U2627
这才是你能吃的[捂脸]	Neutral	2025-10-29 10:27:42	2	U2653
@空白格: 弱弱问一句，这7针胰岛素需要多少人民币？	Neutral	2024-11-02 10:56:41	2	U2628
[赞][赞][赞]	Neutral	2025-04-10 10:25:08	2	U2629
[玫瑰][玫瑰][玫瑰]	Neutral	2025-05-03 15:38:48	2	U2630
[爱心][爱心]	Neutral	2025-05-20 11:17:39	2	U2631
看着都疼	Neutral	2025-04-20 15:24:11	1	U2632
[玫瑰][玫瑰][玫瑰][玫瑰]	Neutral	2025-05-08 12:51:03	2	U2633
我也是一 控制不住嘴[泣不成声]	Neutral	2025-10-27 18:05:02	2	U2634
以前空腹17.5现在稳定5.1[玫瑰]	Neutral	2025-04-18 11:47:03	2	U2635
我的[扎心]	Neutral	2024-03-15 21:04:44	2	U2636
要注意血糖	Neutral	2024-12-05 10:17:20	2	U2637
要经常量血糖	Neutral	2024-04-06 08:05:27	2	U2638
加油糖友。	Neutral	2024-04-04 05:06:52	2	U2639
@不知名的皮聚聚 不要啊	Neutral	2025-05-15 18:18:20	2	U2640
看着你吃的好爽，好羡慕，1.5型咋办医生也没说个所以然，混悬的门冬50好像也不能餐后补打[泣不成声]	Positive	2025-10-14 22:31:49	2	U2641
甜的东西我是一点也不爱吃，确实不高	Neutral	2024-05-08 22:33:35	2	U0084
一天三针，一针20个单位[流泪]	Neutral	2024-05-28 08:23:05	2	U2642
刷到那么多个一型的，为什么都不控制饮食，这样乱吃血糖更不好控，然后波动太大不好。	Neutral	2024-06-10 09:31:55	2	U2643
	Neutral	2024-05-08 17:42:27	2	U2644
用手机看血糖是什么产品？	Neutral	2024-04-21 03:42:22	2	U2645
我都不敢	Neutral	2024-05-08 19:38:37	2	U2646
一直很好奇，这无痛针到底疼不疼[尬笑]	Positive	2024-03-15 21:57:09	2	U2647
弱弱问一句，这7针胰岛素需要多少人民币？	Neutral	2024-03-15 19:43:49	2	U2648
手都扎疼了，今天就测午餐二了算了，因为我午餐后不运动最容易高[流泪]	Neutral	2025-06-11 11:29:42	2	U2649
刚开始胡吃的时候，空腹13左右，饭后都是上20，现在开始减肥降糖控制饮食！	Neutral	2024-05-30 21:18:34	2	U2650
求一下大家推荐，什么血糖仪比较还用啊	Neutral	2025-11-24 08:53:03	2	U2651
感觉快噶了 一身汗	Neutral	2025-11-07 00:07:40	2	U2652
家人们，我用的采血针的针头，我一个星期都不怎么换的，一直都用一颗，不因为什么，只是因为我懒[捂脸]	Neutral	2025-08-20 16:19:11	2	U2682
到底怎么才能好	Neutral	2025-07-12 21:12:26	2	U2655
不打会咋样	Neutral	2025-06-15 17:02:06	2	U2683
我知道一款植物多肽，专门调理糖尿病，我妈就是吃他调理好的，现在不需要吃西药和打胰岛素了	Neutral	2025-06-10 20:49:54	2	U2713
我需要	Neutral	2025-06-10 15:40:07	2	U2715
我2型的，已经好了，三餐前打26个单位，睡前打52个单位，连续打了一个月，已经逆转了	Neutral	2025-05-21 18:52:30	2	U2716
@听婷碎碎念 看看	Neutral	2025-05-11 13:24:01	2	U2717
糖友您好 请问腿上的糖斑有去除的办法吗	Positive	2025-05-10 23:39:13	2	U2718
每天要扎几针，这么太痛苦了吧？	Neutral	2025-04-19 19:01:58	2	U2719
[赞][赞][赞]	Neutral	2025-04-15 17:23:51	2	U0062
[666][666][666][666]	Neutral	2025-04-15 17:01:49	2	U0062
[赞][赞][赞]	Neutral	2025-04-10 11:36:13	2	U2720
你用的啥记录血糖参数，	Neutral	2025-04-09 20:30:35	2	U2721
[鼓掌][666]	Neutral	2025-04-08 22:17:27	2	U2722
我也是糖友	Neutral	2025-04-06 10:27:28	2	U2723
我需要	Neutral	2025-03-29 15:38:47	2	U2724
控糖六驾马车行	Neutral	2025-03-26 17:02:36	2	U2725
没有一个糖尿病是靠打针能好的[玫瑰]	Neutral	2025-03-22 19:16:33	2	U2726
打这么多针	Neutral	2025-03-18 17:41:22	2	U2727
[气球][小黄鸭][福]你	Neutral	2025-03-15 22:11:16	2	U2728
我是一型和对象是网恋的	Neutral	2025-03-13 22:24:37	2	U2729
晚上睡觉了怎么办	Neutral	2025-03-06 22:20:45	2	U2730
	Neutral	2025-03-06 09:48:18	2	U2731
我想问一下你带泵了没有我也是？？？？？[感谢]	Neutral	2025-03-04 23:25:49	2	U2732
[玫瑰]	Neutral	2025-02-27 21:35:05	2	U2733
[赞][赞]	Neutral	2025-02-16 10:50:03	2	U2734
糖尿病能治好的[一起加油][一起加油]	Positive	2025-02-11 11:44:04	2	U2735
想问一下你有做基因检查嘛	Neutral	2025-01-26 12:17:06	2	U2736
居然敢自己给自己打针，痛吗	Neutral	2025-01-20 08:13:14	2	U2737
不是你这样真的能行吗	Neutral	2025-01-03 10:45:42	2	U2738
打胰岛素疼吗？	Neutral	2024-12-30 21:34:30	1	U2739
感觉皮都要扎烂了！	Neutral	2024-12-30 21:24:38	2	U2714
可以问一下糖尿病可以吃什么水果吗	Neutral	2024-12-27 18:00:03	2	U2712
加油[比心]	Neutral	2024-12-26 13:58:37	2	U2685
为什么打那么多针	Neutral	2024-12-25 21:21:23	2	U2711
打胰岛素的时候要捏皮肤哦[比心]	Neutral	2024-12-20 23:18:22	2	U2686
不是啊，我都是不敢吃蛋糕[微笑]	Neutral	2024-12-20 18:58:11	2	U2687
@暗月爱跑步: 一直很好奇，这无痛针到底疼不疼[尬笑]	Positive	2024-12-02 16:17:21	2	U2688
怎么这么瘦还有糖尿病	Neutral	2024-12-02 11:08:10	2	U2689
@用户4389514413371: 羡慕你30克碳水打4个单位，我至少需要10单位[流泪][流泪][流泪][流泪][流泪][流泪][流泪]	Neutral	2024-11-28 14:12:35	2	U2690
为什么不带胰岛素泵	Neutral	2024-11-28 01:17:52	2	U2691
糖尿病能这么吃也太也幸福了吧	Neutral	2024-11-28 01:17:21	2	U2692
糖尿病能这么吃？	Neutral	2024-11-28 01:16:51	2	U2693
怎么这么瘦还有糖尿病	Neutral	2024-11-28 01:16:18	2	U2694
@空白格: 弱弱问一句，这7针胰岛素需要多少人民币？	Neutral	2024-11-27 11:12:42	2	U2695
@龙一: 我2型的，已经好了，三餐前打26个单位，睡前打52个单位，连续打了一个月，已经逆转了	Neutral	2024-11-26 14:07:46	2	U2696
[抱抱你][抱抱你][抱抱你][抱抱你]	Neutral	2024-11-26 14:07:28	2	U2697
加油一起控糖	Neutral	2024-11-25 14:20:43	2	U2698
弱弱问一句，这7针胰岛素需要多少人民币？	Neutral	2024-11-23 10:58:54	2	U2699
高了好几年，16到5，能吃能喝！	Positive	2024-11-22 14:29:25	2	U2700
咯么佛祖岭劳模	Neutral	2024-11-16 14:56:24	2	U2701
我不敢这么吃	Neutral	2024-11-11 14:57:11	2	U2702
我要不是饿八辈子都不想吃东西，吃了还天天事事的	Neutral	2024-11-07 08:45:57	2	U2703
一天打这么多次要多少钱啊[流泪]	Neutral	2024-11-03 18:10:11	2	U2704
[流泪][流泪][流泪]	Neutral	2024-11-03 12:14:00	2	U0076
@空白格: 弱弱问一句，这7针胰岛素需要多少人民币？	Neutral	2024-11-02 10:57:05	2	U2705
[尬笑]	Neutral	2024-10-31 12:43:43	2	U2706
@小叶: 欧态99一个有人知道吗	Neutral	2024-10-27 16:53:24	2	U2707
为什么不控制下碳水，打这么多，肚皮上得多少眼	Neutral	2024-10-16 14:03:48	2	U0077
我娃一型，尽量不吃碳水高的	Neutral	2024-10-16 14:03:14	2	U0077
[看][看][看]	Neutral	2024-10-15 16:17:37	2	U2708
[赞][赞][赞]	Neutral	2024-10-11 09:16:32	2	U2709
[赞][赞][赞]	Neutral	2024-10-10 17:33:34	2	U2710
[赞]	Neutral	2024-10-10 16:26:42	2	U2408
[赞]	Neutral	2024-10-10 16:04:39	2	U2393
加油	Neutral	2024-10-03 15:42:03	2	U2392
就刚才，空腹，35.8，医生拉住我让我住院，也没理他	Neutral	2024-10-03 09:32:57	3	U2391
我现在每天坚持锻炼身体 饮食作息规律 希望一直如此 希望我的分享能够帮助糖友们	Neutral	2024-09-28 15:12:14	2	U2075
你动态用什么血糖仪？	Neutral	2024-09-24 19:50:12	2	U2076
[玫瑰][玫瑰][玫瑰]	Neutral	2024-09-24 14:41:39	2	U2077
[舔屏][舔屏][舔屏]	Neutral	2024-09-23 09:46:31	2	U2078
[玫瑰][玫瑰][玫瑰]	Neutral	2024-09-12 17:51:53	2	U2079
抖音一型糖都有个特点，基本都吃外面饭！	Neutral	2024-09-09 23:08:44	2	U2080
@	Neutral	2024-09-06 12:14:29	2	U2081
[赞]	Neutral	2024-09-02 16:02:13	2	U2082
[赞][赞][赞]	Neutral	2024-08-30 12:59:06	2	U2083
[玫瑰][玫瑰][玫瑰][玫瑰][666]	Neutral	2024-08-23 15:28:17	2	U2084
[赞][赞][赞]	Neutral	2024-08-23 15:16:51	2	U2085
偶遇	Neutral	2024-08-19 10:12:22	2	U2086
加油糖友	Neutral	2024-08-17 20:11:52	2	U2087
这样生活每天是不是特别繁琐	Neutral	2024-08-15 10:19:15	2	U2088
[666][666][666]生活a	Neutral	2024-08-12 16:41:53	2	U2089
我也是糖友	Neutral	2024-09-04 13:03:57	2	U2090
[666][666][666]	Neutral	2024-08-12 16:30:46	2	U2091
[666][666][666]	Neutral	2024-08-12 10:02:15	2	U2092
这能行？	Neutral	2024-08-09 10:51:09	2	U2093
[捂脸][捂脸][捂脸]	Neutral	2024-08-01 19:18:31	2	U2094
[赞][赞][赞]	Neutral	2024-07-29 11:40:36	2	U2095
欧态99一个有人知道吗	Neutral	2024-07-26 21:41:00	2	U2096
这个自己给自己打针看着好吓人[泣不成声]	Neutral	2024-07-24 13:34:30	2	U2097
[一起加油][一起加油][一起加油]	Neutral	2024-07-22 17:19:13	2	U2098
你可以这样……	Neutral	2024-07-22 13:53:11	2	U2099
[比心][比心][比心]	Neutral	2024-07-22 12:18:21	2	U2074
@你挺能闹i631: 今天确诊糖尿病 搜的糖尿病第一个就是你的视频 以后也要和它对抗了	Neutral	2024-07-19 12:15:40	2	U2072
什么血糖仪比较准、	Neutral	2024-07-17 21:18:56	2	U2045
我也是1型糖尿病，血糖好难控制，经常出现低血糖。	Positive	2024-06-29 20:12:09	2	U2071
[玫瑰][玫瑰][玫瑰]	Neutral	2024-06-24 11:52:29	2	U2046
[灵机一动]建议看看《失传的营养学》，我有电子版	Neutral	2024-06-21 16:31:32	2	U2047
我是糖前期都什么都不敢吃[流泪]	Neutral	2024-06-13 22:01:07	2	U2048
我没糖尿病都不吃甜品，因为我妈有糖尿病，要自律啊	Neutral	2024-06-13 00:13:10	2	U2049
一天得多少针啊 我现在一周一针 一天一针都够够够够的了	Neutral	2024-06-12 08:49:23	2	U2050
我之前的同事跟你一样 每天肚子扎针吃药[泪奔]一天天的就是不忌口 [捂脸] 就爱甜口 天天饮料零食	Neutral	2024-06-12 01:08:21	2	U2051
吃啥都要打来打去，好麻烦。	Neutral	2024-06-11 16:58:24	2	U2052
[流泪]迷茫刚刚确诊二	Neutral	2024-06-11 11:32:46	2	U2053
你怎么全是在肚子上？	Neutral	2024-06-10 22:13:19	2	U2054
[呲牙]我这两天老是刷到一糖的小姐姐，重点是生活都过的比我好[捂脸]	Neutral	2024-06-10 21:44:26	2	U2055
这个蛋糕非要吃吗？	Neutral	2024-06-10 18:52:45	2	U0055
好好保养吧！年龄大了会抗不住的	Positive	2024-06-10 17:51:52	2	U2056
天天扎自己，看着就好痛苦	Neutral	2024-06-10 12:21:29	2	U2057
吃的这么狠[偷笑]	Neutral	2024-06-09 16:54:44	2	U2058
要打多久啊	Neutral	2024-06-09 15:39:18	2	U2059
这不能恢复您的免疫力，得找个心里医生指导一下。	Neutral	2024-06-09 15:05:15	3	U2060
看着都害怕	Neutral	2024-06-09 12:22:47	2	U2061
这针打的时候疼吗	Neutral	2024-06-08 20:05:33	1	U2062
为什么不带泵	Neutral	2024-06-08 18:56:55	2	U2063
几个针啊	Neutral	2024-06-08 16:28:59	2	U2064
都扎针了还吃奶油蛋糕呀	Neutral	2024-06-08 15:47:34	2	U2065
为什么刷到的1型都随便吃啊，各种奶茶蛋糕。2型连个米饭面条都不敢吃。连粗粮窝头都不能多吃[流泪][流泪]	Neutral	2024-06-08 15:19:17	2	U2066
结婚生子会遗传吗？	Neutral	2024-06-08 12:18:30	2	U2067
看得我有点难受啊[捂脸][捂脸][捂脸]	Neutral	2024-06-07 21:43:15	2	U2068
是不是移植胰腺就会解放了	Neutral	2024-06-07 13:12:55	2	U2069
一天要七针	Neutral	2024-06-06 18:27:32	2	U2070
我就喜欢这种忌不住嘴又努力控制的 我也好想这种生活 可是钱不够 只能忌嘴 还弄不好 这种就很舒服 找到了平衡点	Neutral	2024-06-05 13:55:59	2	U2100
还吃糖甜食这么严重。真的不敢吃的	Neutral	2024-06-04 11:11:59	2	U2073
一型这么随便吗	Neutral	2024-06-03 14:59:49	2	U2101
[比心][比心][比心]	Neutral	2024-06-02 21:07:49	2	U2131
用的是什么牌子的血糖仪	Neutral	2024-06-02 19:55:46	2	U2133
这么年轻，打这个针[捂脸]	Neutral	2024-06-02 15:55:18	2	U2134
我刚确诊，每天都是饿	Neutral	2024-06-01 16:33:50	2	U2135
你6.7还在打胰岛素？？我老公六点几不打胰岛素，支持降血糖的药	Neutral	2024-05-31 23:50:37	2	U2136
一型这么辛苦啊？一直以为都是一样的呢	Neutral	2024-05-31 21:42:21	2	U2137
[感谢][感谢][感谢][感谢][感谢][感谢][感谢]	Neutral	2024-05-31 17:23:52	2	U2138
我2型，空腹13到17[尬笑]吃着二瓜，睡前来一针，戒了外卖两个月，直接正常了，现在停药了[大笑]只要不吃外卖，啥都敢吃[大笑]	Neutral	2024-05-29 22:30:59	2	U2139
手上那个珠子挺好看[看]我没舍得买	Positive	2024-05-29 16:54:21	2	U2140
打针疼不疼啊	Neutral	2024-05-29 16:16:02	2	U2141
666	Neutral	2024-05-29 15:32:26	2	U2142
吃不了甜的就不要吃了，忌好嘴比什么都好	Neutral	2024-05-29 12:43:44	2	U2143
一型糖是真难搞[捂脸]	Neutral	2024-05-29 08:44:21	2	U2144
抱抱你 第一次感觉到 每天能正常吃口饭 其实就是幸福的	Neutral	2024-05-29 00:18:03	2	U2145
该吃吃该喝喝吧！	Neutral	2024-05-28 19:43:45	2	U2146
你好，我是二型糖尿病患者，能跟你学习吗？	Positive	2024-05-28 16:31:01	2	U2147
好像不能吃米吧我记得之前我实习的时候，一个小女孩十二岁左右，喝了一碗大米汤，一直再吐，血糖22	Positive	2024-05-28 13:56:54	2	U2148
唉	Neutral	2024-05-28 11:02:30	2	U2149
沃德天呐，病人不忌口，跑断医生的腿[黑脸]	Neutral	2024-05-28 09:36:39	2	U2150
这么打早晚抵抗胰岛素 糖尿病就得管住嘴 迈开腿	Neutral	2024-05-28 00:35:30	2	U2151
妈呀！一天都在打针[呲牙][呲牙]	Neutral	2024-05-27 22:34:46	2	U2152
为什么会得糖尿病谁告诉我[流泪][流泪][流泪][流泪]我有点害怕	Neutral	2024-05-27 18:19:22	2	U2153
为什么会得糖尿病？谁告诉我有点害怕。	Neutral	2024-05-27 18:08:36	2	U2154
为什么会得糖尿病谁告诉我[流泪][流泪][流泪]我有点害怕	Neutral	2024-05-27 18:08:00	2	U2155
以后嫁人怎么办啊？	Neutral	2024-05-27 14:28:02	2	U2156
何必呢，为了吃	Neutral	2024-05-27 12:54:30	2	U2157
你这么会控糖，来给我爸爸当女儿吧！你们一起控[尬笑]我就不费神了他还听你话，因为能吃这么多好吃对的血糖还很稳[捂脸]	Positive	2024-05-26 23:09:30	2	U2132
整个胰岛泵就完事了	Neutral	2024-05-26 19:08:18	2	U2130
我也有，不吃米面，甜的东西，特别是水果，奶茶	Neutral	2024-05-26 01:02:08	2	U2103
建议控制饮食	Neutral	2024-05-26 00:03:26	2	U2129
@呜呼 那按理说只要针打的够，吃啥都行吗	Neutral	2024-05-25 19:53:26	2	U2104
天天这么吃扎那么多针	Neutral	2024-05-25 19:29:25	2	U2105
甜品完全可以不要吃，吃了又打一针	Neutral	2024-05-24 14:24:46	2	U2106
我想知道出门在外胰岛素怎么保存的	Neutral	2024-05-24 12:45:18	2	U2107
我看见你很喜欢甜品奶茶之类食品[看]这些食品至少有5种糖混合在一起提升口感，糖分是普通的白砂糖5倍到10倍	Neutral	2024-05-24 01:26:53	2	U2108
小姐姐打的什么	Neutral	2024-05-23 11:41:14	2	U2109
为什么带着动态，每天还要测空腹血糖？	Neutral	2024-05-22 19:52:44	2	U2110
这样吃能行吗	Neutral	2024-05-22 18:24:30	2	U2111
这怎么吃都不会胖吧	Neutral	2024-05-22 15:37:32	2	U2112
我也得糖尿病了[流泪]	Neutral	2024-05-22 12:17:25	2	U2113
这是遗传，还是后天的	Neutral	2024-05-22 11:04:23	2	U2114
年轻爱喝奶茶，甜咖啡，胡吃海喝	Neutral	2024-04-10 18:38:19	2	U2115
积极心态面对	Neutral	2024-08-21 11:37:35	2	U2116
对面以为是司美格鲁肽呢	Neutral	2024-04-11 08:53:02	2	U2117
这么年轻就得糖尿病了 我爷爷打这个针打了几十年了	Neutral	2024-04-11 16:01:23	2	U2118
打胰岛素…时间长了…老了会腐蚀脚🦶，，先从脚上烂	Neutral	2024-04-13 11:40:03	2	U2119
不是，才20出头，也不胖不瘦，为啥会得糖尿病[宕机]	Neutral	2024-04-11 18:08:42	2	U2120
血糖要注意	Neutral	2025-07-05 19:37:30	2	U2121
你我本无缘全靠这个打胰岛素没有拔盖[捂脸]	Neutral	2025-08-25 19:16:07	2	U2122
太难了，降不下去。我也要去打胰岛素了[捂脸]	Neutral	2024-05-06 08:13:45	2	U2123
那肚子上是不是全是孔	Neutral	2024-04-11 12:09:25	2	U2124
年纪轻轻就打胰岛素了	Neutral	2024-04-11 15:17:36	2	U2125
打一辈子太难受	Neutral	2024-04-10 15:41:27	2	U2126
这个一打就是一辈子呀……	Neutral	2024-04-11 15:47:58	2	U2127
我二型的，7.2-9点了[流泪]	Neutral	2024-04-10 19:40:51	2	U2128
这个男孩子挺暖心的，怕你乱打减肥的伤害身体，本来想劝导你的[捂脸]	Neutral	2024-04-11 15:16:46	2	U2102
[看]这样，你多一点仪式感就不会误会了 打进去的时候，你闭上眼轻轻摇头，然后一边抬头一边深吸一口气，最后肩膀收紧憋住2秒再放松呼气，这样大家就知道不是减肥药了	Neutral	2024-04-13 16:50:40	2	U2044
我说这胰岛素打一针扎一个针眼，见天打受的了吗？再如果晕针的或胆小怕针的自己能下手吗，是不得找个人动手？[求抱抱][不失礼貌的微笑]	Neutral	2024-04-13 17:10:24	2	U2043
糖尿病尿是甜的吗[泣不成声][泣不成声]	Neutral	2024-04-12 12:08:29	2	U2042
这么瘦怎么还有糖尿病	Neutral	2024-04-11 18:17:10	2	U1959
[捂脸]不对啊。一般来讲，人瘦不会有三高。	Neutral	2024-04-13 14:59:43	2	U1960
我爸得糖尿病二十多年了 也是天天打 但是她这么年轻就开始打了	Neutral	2024-04-13 12:16:25	2	U1961
全自动换成了纯手动而已[看]几个月前我从来没有想过我每天会为了一条线努力努力再努力	Neutral	2024-09-17 08:32:40	2	U1962
要扎到肉里面吗？还是贴着皮肤它自己钻进去？	Neutral	2024-04-13 12:04:50	2	U1963
年纪轻轻打胰岛素了？	Neutral	2024-04-11 17:48:41	2	U1964
我妈妈的很高二十点多现在在医院住院呢[捂脸]	Neutral	2025-06-17 21:11:23	2	U1965
怎么不看中医？	Neutral	2024-05-12 13:15:56	2	U1966
一型2年多。在哪吃饭就在那打胰岛素。从不在乎别人眼神[微笑]	Neutral	2024-05-10 11:59:00	2	U1967
胰岛素也能减肥[干饭人]	Neutral	2024-05-10 10:04:06	2	U1968
原来我们同命相连1 型	Neutral	2024-05-09 23:11:12	2	U1969
[比心][比心][比心]	Neutral	2024-05-09 17:48:57	2	U1970
对了，有个硅胶血糖仪你可以戴胳膊上随时用app看。	Neutral	2024-05-09 14:14:57	2	U0059
上海可以治疗了。	Neutral	2024-05-09 14:10:19	2	U0059
磕那啥是吧	Neutral	2024-05-09 01:04:30	2	U1971
这个高血糖 后遗症很多的，比如腰疼 脚疼 眼睛模糊充血 心脏血管堵塞 等等	Neutral	2024-05-08 23:05:37	2	U1972
不是，瘦的咋得的糖尿病，多半看别人得的是瞎吃瞎喝肥肥	Neutral	2024-05-08 20:35:16	2	U1973
那么漂亮怎么[思考]	Positive	2024-05-08 20:26:21	2	U1974
唉，加油，控制好，控制不好尿毒症	Neutral	2024-05-08 19:18:51	2	U1975
我以为下一步就是要微信哈哈哈	Neutral	2024-05-08 19:05:55	2	U1976
别吃主食啊	Neutral	2024-05-08 19:03:32	2	U1977
打这个疼吗	Neutral	2024-05-08 18:54:50	1	U1978
疼	Neutral	2024-05-08 18:26:34	1	U1979
胰岛素可以增肥	Neutral	2024-05-08 18:16:38	2	U1980
最近看新闻，有最新的药物可以治愈了	Neutral	2024-05-08 18:12:28	2	U1981
好像有新的治疗方案了，注意啊	Positive	2024-05-08 17:24:14	2	U1982
打完翻白眼抽搐一会儿，直接吓跑报警[尬笑]	Neutral	2024-05-08 17:04:43	2	U1983
小妹妹挺乐观的。加油会好的	Neutral	2024-05-08 16:48:35	2	U1958
我打了司美格鲁肽，用的0.4的胰岛素针，发展一点都不疼，甚至连感觉都没有	Neutral	2024-05-08 16:32:31	1	U1957
刚看了个新闻，5月7号中国世界首例，换胰岛腺成功，永久解决。好像手术费是30万[抠鼻]	Positive	2024-05-08 16:22:44	2	U1956
现在不是出了治这个病的药啦，根治的	Neutral	2024-05-08 16:07:45	2	U1955
我亲戚糖尿病今年60+，脚指头切了。	Neutral	2024-05-08 15:37:26	2	U1929
糖尿病	Neutral	2024-05-08 15:02:48	2	U1930
加油	Neutral	2024-05-08 14:40:19	2	U1931
疼不	Neutral	2024-05-08 12:38:05	1	U1932
唉呀可惜了，这么年轻	Neutral	2024-05-08 12:10:38	2	U1933
好消息啊 世界首例自体再生胰岛移植成功	Positive	2024-05-08 06:56:54	2	U1934
我说刚看到一个消息，说是二型能治了，那一型是不是以后也就能治了？抱有期望总是没错的	Neutral	2024-05-08 00:02:19	2	U1935
看管子确实不是司美格鲁肽[不看]	Neutral	2024-05-07 12:25:08	2	U1936
疼吗？	Neutral	2024-05-07 01:30:24	1	U1937
诺和笔	Neutral	2024-05-06 20:07:51	2	U1938
你扎的真熟练	Neutral	2024-05-06 20:04:49	2	U1939
打的时候会疼吗	Neutral	2024-05-06 16:46:17	1	U1940
疼不疼啊？	Neutral	2024-05-06 10:27:36	2	U1928
马大帅是不是看客人打胰岛素报警了[捂脸]	Neutral	2024-05-05 23:44:25	2	U1941
喝奶茶和的	Neutral	2024-05-05 22:52:26	2	U1943
怎么瘦，就得血糖高。大家都是病友[感谢][感谢][感谢]	Neutral	2024-05-05 21:44:52	2	U1944
估计被误认为司美格鲁肽	Neutral	2024-05-05 21:36:34	2	U1945
吃啥了这么高	Neutral	2024-05-05 17:32:41	2	U1946
你的血糖很稳啊！我认识一个女孩，她是16，20，4来回跳	Neutral	2024-05-05 17:29:47	2	U1947
打胰岛素疼不疼啊？	Neutral	2024-05-05 11:35:38	2	U1948
同志，你这批货在哪弄的[钱]	Neutral	2024-05-05 11:20:33	2	U1949
我去医院检查也说我血糖高，唉	Neutral	2024-05-04 20:51:26	2	U1950
这么年轻就得胰腺上的病。	Neutral	2024-05-04 16:16:09	2	U1951
和你一样，天天三短一长的，但是在外面我不敢打，都是躲厕所里打，就怕别人异样的眼光	Neutral	2024-05-03 16:15:40	2	U1952
这种病是怎么传承下来的。	Neutral	2024-04-29 09:31:42	2	U1953
为啥打胰岛素都要录视频[流泪]	Neutral	2024-04-28 23:43:18	2	U1954
我在静吧和朋友喝点，打了一针，服务员让我别乱搞，违禁品[捂脸][捂脸][捂脸][捂脸]	Neutral	2024-04-28 20:04:42	2	U1984
喝羊奶啊[不失礼貌的微笑]	Neutral	2024-04-28 16:38:56	2	U1985
[赞][赞][赞]	Neutral	2024-04-18 00:10:31	2	U1986
飞的就和加负荷时候的气温似的[发怒]	Neutral	2024-04-17 18:16:08	2	U2015
承认是减肥的，不是更好嘛。[偷笑][偷笑]	Positive	2024-04-17 10:29:06	2	U2017
这么漂亮也打针	Positive	2024-04-15 09:51:05	2	U2018
我也有这个病[流泪]	Neutral	2024-04-14 18:27:45	2	U2019
真惨，糖尿病什么时候可以治愈啊	Neutral	2024-04-14 17:32:09	2	U2020
痛吗？	Neutral	2024-04-14 14:31:17	2	U2021
那是不是特别疼呀，这得多难受呀[泣不成声]	Neutral	2024-04-14 08:16:24	1	U2022
	Neutral	2024-04-14 06:59:57	2	U2023
这疼吗[泣不成声]	Neutral	2024-04-13 22:00:45	2	U2024
少吃碳水化合物是不是可以少打点	Neutral	2024-04-13 21:16:40	2	U2025
同款笔管[赞]	Neutral	2024-04-13 20:14:54	2	U0092
才发现是一个学校的	Neutral	2024-04-13 20:10:44	2	U2026
我17岁得的一型糖[流泪][流泪][流泪]	Neutral	2024-04-13 20:07:42	2	U0092
不吃糖吃只吃肉行不行	Neutral	2024-04-13 19:22:03	2	U2027
所以不吃饭不就好了？	Neutral	2024-04-13 18:45:09	2	U2028
@阿琪的琪 天哪遗传[噢买尬][噢买尬]	Neutral	2024-04-13 18:26:46	2	U2029
你才多大	Neutral	2024-04-13 18:08:43	2	U2030
每天扎针 感觉好痛[发呆][发呆] 偶尔打一次屁股针都疼好几天	Positive	2024-04-13 18:08:00	2	U2031
糖尿病，太吓人了	Neutral	2024-04-13 18:06:33	2	U2032
呵呵，以前坐火车打针，被乘警叫去问话了[你不大行]	Neutral	2024-04-13 18:04:11	2	U2033
为什么不打屁股	Neutral	2024-04-13 18:01:50	2	U2034
临床治愈不少糖尿病	Neutral	2024-04-13 17:17:49	2	U2035
这么年轻就…糖尿病？？？？	Neutral	2024-04-13 17:15:54	2	U2036
好想有人减肥确实打胰岛素太狠了[捂脸]	Neutral	2024-04-13 17:09:16	2	U2037
不疼吗	Neutral	2024-04-13 17:01:08	2	U2038
胰岛素确实有减肥功能	Neutral	2024-04-13 17:00:13	2	U2039
生活中没遇见过一型的，基本都是二型，啥区别啊	Neutral	2024-04-13 16:59:34	2	U2040
这么瘦还糖尿病？	Neutral	2024-04-13 16:58:25	2	U2041
这么小打胰岛素要认真注意身体啊，我见过几个了打胰岛素十多年后变成洗肾，一个星期要洗2次。	Neutral	2024-04-13 16:57:25	2	U2016
真狠啊，那不疼	Neutral	2024-04-13 16:53:03	2	U2014
[白眼]这 对未来有什么影响	Neutral	2024-04-13 16:33:49	2	U1987
这糖。。这飞的不高[呲牙][呲牙][呲牙]还行[赞][赞][鼓掌][鼓掌][鼓掌][鼓掌]	Neutral	2024-04-13 16:32:50	2	U2013
疼不疼[看]	Neutral	2024-04-13 16:31:50	2	U1988
疼吗[捂脸]	Neutral	2024-04-13 16:30:50	1	U1989
范总，你也来吃饭了	Neutral	2024-04-13 16:28:27	2	U1990
痛不痛	Neutral	2024-04-13 16:25:13	2	U0088
没问你是不是马飞	Neutral	2024-04-13 16:20:10	2	U1991
有的人就是打糖尿病的针瘦	Neutral	2024-04-13 16:16:19	2	U1992
唉，这么年轻	Neutral	2024-04-13 15:59:10	2	U1993
	Neutral	2024-04-13 15:58:51	2	U1994
这么年轻就开始打胰岛素[泣不成声][泣不成声]	Neutral	2024-04-13 15:58:47	2	U1995
的确很好减肥，当血糖飙升立马暴瘦，因为我妹妹也有糖尿病，她只要一暴瘦我就知道她血糖不稳定了。	Neutral	2024-04-13 15:58:03	2	U1996
洋姜，天然胰岛素	Neutral	2024-04-13 15:56:39	2	U1997
疼不疼	Neutral	2024-04-13 15:53:26	2	U1998
打这针疼吗？[不是吧]	Neutral	2024-04-13 15:49:43	1	U1999
给那位亲爱的男同学也打针吗？	Neutral	2024-04-13 15:17:34	2	U2000
努力活着就是大部分人的心愿	Neutral	2024-04-13 15:09:24	2	U2001
一型糖	Neutral	2024-04-13 15:08:41	2	U2002
有这个东西，很多东西都不能吃。一点乐趣都懵了。[感谢]	Neutral	2024-04-13 15:06:41	2	U2003
[发呆]这么小的年纪，就三高了吗	Neutral	2024-04-13 15:06:26	2	U2004
[白眼]明目张胆注射，确实容易让人误解	Neutral	2024-04-13 15:04:51	2	U2005
感觉我得控制一下甜食了，[尬笑]	Neutral	2024-04-13 15:04:19	2	U2006
这么点小屁孩得糖尿病？？？？	Neutral	2024-04-13 15:01:34	2	U2007
…这肚子上竟是针眼	Neutral	2024-04-13 14:59:38	2	U2008
这东西疼吗[暗中观察]	Neutral	2024-04-13 14:58:20	1	U2009
这个药没有口服的嘛	Neutral	2024-04-13 14:56:49	2	U2010
更要命 糖尿病[捂脸]	Neutral	2024-04-13 14:46:11	2	U2011
打这个，那针头扎进去痛吗？	Neutral	2024-04-13 14:32:40	2	U2012
这么年轻血糖高？	Neutral	2024-04-13 14:32:30	2	U2158
胰岛素这东西好像依懒性还蛮强的	Positive	2024-04-13 13:46:23	2	U1942
这么小就糖尿病了	Neutral	2024-04-13 13:42:23	2	U2159
说人年龄的，有一种病叫青少年型糖尿病，遗传病[困]	Neutral	2024-04-13 13:41:10	2	U2175
疼吗？	Neutral	2024-04-13 13:40:42	1	U2308
不疼吗[暗中观察]	Neutral	2024-04-13 13:40:18	2	U2309
富贵病，受罪命[捂脸]	Neutral	2024-04-13 13:39:54	2	U2310
注射型那啥[九转大肠]	Neutral	2024-04-13 13:38:16	2	U2311
一针多少钱？	Neutral	2024-04-13 13:37:57	2	U2312
糖尿病	Neutral	2024-04-13 13:37:51	2	U2313
这，随便打的吗，[泣不成声][泣不成声][泣不成声]	Neutral	2024-04-13 13:36:13	2	U2314
隔着肚皮怎么打进去的[疑问][疑问][疑问][疑问]	Neutral	2024-04-13 13:35:16	2	U2315
不是说胖子才容易得吗	Neutral	2024-04-13 13:33:42	2	U2316
糖尿病就是磨人	Neutral	2024-04-13 13:23:03	2	U2317
不疼吗？	Neutral	2024-04-13 13:12:11	2	U2318
扎一下痛不痛啊	Neutral	2024-04-13 13:12:01	2	U2319
糖吃多了，我也是[捂脸]	Neutral	2024-04-13 13:11:03	2	U2320
人常见的的二型糖尿病，而小姐姐是一型糖尿病，这个几乎都是先天的，而且还没有特效药，只能用胰岛素，希望未来能有特效药吧，小姐姐加油	Neutral	2024-04-13 13:10:32	2	U2321
我也帮我爷爷打过，就是胰岛素	Neutral	2024-04-13 13:07:18	2	U2322
才多大啊糖尿病这么严重	Neutral	2024-04-13 13:06:07	2	U2323
在宿舍打好，再下来吃饭是不是更好[捂脸]	Positive	2024-04-13 12:16:31	2	U2324
不疼吗？这？	Neutral	2024-04-13 12:10:35	2	U2325
好疼呀，按一下	Neutral	2024-04-13 12:10:17	2	U2326
这样让马大帅看见[捂脸]	Neutral	2024-04-13 12:08:46	2	U2327
我血糖最高的时候，空腹血糖28[泣不成声][流泪][流泪]	Neutral	2024-04-13 11:43:57	2	U2328
看着好害怕[捂脸]少喝点含糖的飞飞吧	Neutral	2024-04-13 11:41:37	2	U2329
我以为你在打肾上腺素[微笑]	Neutral	2024-04-12 23:32:33	2	U2330
[抱抱你][抱抱你]	Neutral	2024-04-12 21:00:53	2	U2331
难道要每顿饭都打吗，感觉好麻烦，经常打对身体有危害吗[宕机]	Neutral	2024-04-12 20:46:46	2	U2332
有一个降糖药现在很多人就拿来减肥	Neutral	2024-04-12 20:39:08	2	U2307
请问你们家是不是有吃夜宵的习惯？	Neutral	2024-04-12 19:07:52	2	U2305
真受罪啊，这个病。哎，还是遗传的。[流泪]	Neutral	2024-04-12 18:11:58	2	U2278
天天扎不疼吗	Neutral	2024-04-12 16:46:31	1	U2304
不能埋针吗 我大学同学都是按一下就行 没药了 才会扎针	Neutral	2024-04-12 16:27:41	2	U2279
@阿雨（一型糖） 好勇敢，我这么多年还是不敢在外面打胰岛素[捂脸][捂脸]	Neutral	2024-04-12 16:00:35	2	U2280
我以为只有胖子得[捂脸]	Neutral	2024-04-12 15:29:01	2	U2281
好好治疗，好好生活，做不被定义的女孩，加油	Positive	2024-04-12 13:32:00	2	U2282
有誰會那麼沒常識又沒禮貌還直接問人是不是減肥的[捂脸]	Neutral	2024-04-12 13:26:19	2	U2283
疼嘛[流泪]	Neutral	2024-04-12 13:18:57	2	U2284
上泵吧	Neutral	2024-04-12 13:03:42	2	U2285
这玩意扎一下疼不疼[泪奔]	Neutral	2024-04-12 13:02:51	2	U2286
我滴妈 自己打疼不疼啊	Neutral	2024-04-12 12:52:55	1	U2287
降血糖也能减肥吧	Neutral	2024-04-12 12:51:28	2	U2288
看得我好疼[微笑]	Neutral	2024-04-12 12:49:03	1	U2289
每次打针不疼吗	Neutral	2024-04-12 12:48:17	2	U2290
下次可以找个角落蹲着，然后左顾右盼看下没什么人就打[耶]	Neutral	2024-04-12 12:48:15	2	U2291
大概率甜食奶茶可多了	Neutral	2024-04-12 12:47:12	2	U2292
伊能静？	Neutral	2024-04-12 12:37:13	2	U2293
打的时候疼吗	Neutral	2024-04-12 12:27:48	1	U2294
要是没事吸吸鼻子，偷偷摸摸的打[看]	Neutral	2024-04-12 12:21:51	2	U2295
[赞][赞][赞]	Neutral	2024-04-12 12:15:54	2	U2296
	Neutral	2024-04-12 12:06:23	2	U2297
什么是被误解。。。。是不懂所以来问一下而已	Neutral	2024-04-12 11:59:15	2	U2298
喝蜜雪喝的	Neutral	2024-04-12 11:58:08	2	U2299
很多疾病都是基因决定的	Neutral	2024-04-12 11:36:33	2	U2300
我小学同学也要打，每次都是她妈妈来的，看着有点可怜	Neutral	2024-04-12 11:29:17	2	U2301
酮症能闻出来，浑身散发出一股很恶心的味道，要是身边人突然变臭一定要注意。	Negative	2024-08-20 17:00:47	2	U2302
[宕机]讲真的 从口渴那一开始 都已经糖了 糖尿病又叫消渴症，特别口渴那里已经很明显了，只是你没有接触过，所以不知道[泪奔]	Neutral	2024-08-18 21:31:31	2	U2303
友情提示:博主这个体重下降都是属于很严重的反应了，跟你们讲讲前期的症状，吃完饭就困，有时候饿的会手发抖，心慌，身上很痒，平时早上没那么臭，有段时间早上起来嘴巴特别苦还臭，记住了，去医院查糖耐量，记住，是糖耐量，普通血糖检查前期查不出来的，一定得是糖耐量	Neutral	2024-08-18 20:43:57	2	U2333
我前任也是酮症酸中毒，天天说渴，然后我百度搜了下说有可能是血糖高，我药店买了个血糖仪直接是测不出来显示hi，第二天去医院测了33，直接就住院了	Neutral	2024-08-18 19:31:35	2	U2306
三多一少太典型了	Neutral	2024-08-18 21:34:24	2	U2334
在医院内分泌科直观的感受到了常见饮料的含糖量[尬笑]	Neutral	2024-08-21 10:18:03	2	U2364
你不是这个月折腾出来的糖尿病，而是你的糖尿病折腾了你一个月	Neutral	2024-08-20 16:35:51	2	U2366
你们根本不懂一直喝无糖的人每次在那种公司聚餐行政统一点的7分糖／全糖奶茶想着免费拿了一杯结果喝了一口就放那再也喝不下去了[绝望的凝视]看了眼周围人根本不知道他们怎么喝下去的 我知道小料就已经泡了糖水了，所以无糖配小料已经足以，结果还额外加糖[捂脸]	Neutral	2025-08-09 23:28:34	2	U2367
朋友们，出门就把自己当糖尿病，奶茶不加糖，饮料喝无糖，少喝碳酸饮料，坚持一个月，你就会发现，喝饮料带点甜的就会觉得难喝，很健康的	Neutral	2024-08-22 21:54:30	2	U2368
我爸也是糖尿病，是年轻的时候不喝水只喝饮料造成的，所以家人们喝奶茶饮料真的适量啊，别把饮料奶茶当水喝[流泪]	Neutral	2024-08-20 19:09:48	2	U2369
一听说瘦了，我就知道自己安全了[流泪]	Neutral	2024-08-18 19:55:38	2	U2370
多喝水！多喝水！多喝水！少喝甜饮料！少喝甜奶茶！	Neutral	2024-08-20 16:50:05	2	U2371
一型糖尿病:“多饮多尿多食”，多发于青年	Neutral	2024-08-18 23:03:56	2	U2372
其实你的体重维持在一个固定的水平，那才是健康的。平常如果不健身啊，不运动，但你的体重一直在上下浮动的话，那可能是身体不太好，我们老师跟我们讲的	Positive	2024-08-18 22:03:12	2	U2373
姐妹们 别担心了 经常口渴 总去厕所 体重暴瘦才是糖尿病 我们的体重稳如磐石[捂脸][捂脸][OK]	Neutral	2024-08-18 23:05:58	2	U2374
她不是一个月变成了糖尿病，而且一个月分了三个阶段发现了糖尿病	Neutral	2024-08-18 20:29:21	2	U2375
水只喝45度温开水，吃饭在家里吃，不要顿顿吃肉，少油少盐，吃7分饱，晚上11点睡，早上7点起床，中午睡半小时，不抽烟，不喝酒，一周运动2～3次，不要长时间看手机，保持好心情，做到这些基本可以避免生病	Neutral	2024-08-20 18:01:40	2	U2376
医学生，屏幕前你有每天没有摄入足够的水，不是饮料，再考虑糖，第二饮食，第三运动，糖尿病的五架马车，做好饮食和运动，除非一型，一般不会得，哪怕糖耐量出问题也有可能恢复	Positive	2024-08-18 23:10:33	2	U2377
一型糖尿病患者，只是时间早晚的问题，主要是遗传因素，只要活着终有一天会糖。 二型就是后天自己不注意健康饮食引起。 说到这，主播家里应该有糖尿病病人吧？为啥好像什么都不懂的样子！	Positive	2024-08-18 19:44:23	2	U2378
？？？我最近巨口渴，一直在喝矿泉水解渴，喝了没多久就渴的厉害，害怕[震惊][震惊][震惊][震惊]	Neutral	2024-08-18 19:53:48	2	U2379
糖尿病的症状就是三多一少:多饮、多食、多尿，体重减轻(没有减肥的情况下突然体重下降)，有这几种症状的要注意了[感谢]	Neutral	2024-08-18 19:39:43	2	U2380
我一个糖高六年的人听到你说湿疹，包子，饮料，葡萄糖，粥，感觉整个人都快窒息了。你真是命大	Neutral	2024-08-18 21:38:48	2	U2381
听完你说你一型糖尿病，那跟遗传关系更大[尬笑]	Neutral	2024-08-20 16:29:58	2	U2382
完了…湿疹…口渴…很少发烧…爱喝饮料…[逞强落泪]	Neutral	2024-08-24 00:33:26	2	U2383
不存在一个月就患糖的可能，你应该几年前就血糖高了，只是一直不注意罢了。	Neutral	2024-08-18 20:25:22	2	U2384
不喜欢甜的 喜欢吃泡面 炸鸡 土豆 各种升糖指数都高 我妈有糖尿病 怀二胎时血糖高 生完孩子后 正常了 但是可能有胰岛素抵抗 血糖不是很理想 一不小心 餐二就8点多 所以我的快乐没有了 想吃的东西不能随便吃[流泪][流泪][流泪][流泪]	Neutral	2025-07-20 09:51:45	2	U2385
家里有直系亲属得过糖尿病的！！一定要注意！！！！特别是瘦多囊的！！！一定要去查胰岛素抵抗！！	Neutral	2024-08-18 23:24:30	2	U2386
有两天我半夜老是渴醒，一晚上喝了8次水，每次睡醒就被嗓子渴醒，吓得我睁眼到天亮，去医院测了血糖5.1，吓死我了，还以为糖尿病了，后来才知道，是我睡前吃了卤猪头肉，还有麻辣香锅，纯粹是渴的	Neutral	2025-08-14 16:24:58	2	U2387
平时体检，一定要记得查空腹血糖，现在糖尿病都年轻化了，如果有口干、多饮、多尿、暴瘦就要注意了[比心]	Neutral	2024-08-18 22:40:13	2	U2388
@	Neutral	2025-11-28 03:28:52	2	U2389
加油	Neutral	2025-10-21 20:23:55	2	U0018
为什么会低温 ，会高血糖？低温为什么不去看医生。忽略了 就时间	Neutral	2025-10-19 18:14:25	3	U2390
吃药不行吗	Neutral	2025-10-18 20:00:12	2	U2365
平时多吃醋多吃辣可以预防	Neutral	2025-10-18 03:12:01	2	U0047
经典新冠	Neutral	2025-10-18 02:16:10	2	U2363
是熬夜熬的吗？长期	Neutral	2025-10-17 17:06:24	2	U2336
怎么坚持15天不去医院检查的	Neutral	2025-10-17 00:50:38	2	U2362
一型是基因问题	Neutral	2025-10-16 19:23:09	2	U2337
幸好我小时候虽然不爱喝水爱喝饮料，但都是拿家里做的米汤当水喝，如果没有米汤我可能真就拿饮料当水喝了[噢买尬]	Positive	2025-10-16 16:29:04	2	U2338
还有什么不开心的事，说出来，让哥再高兴高兴～	Neutral	2025-10-15 23:36:32	2	U2339
有的人4岁8岁13岁…………得了糖尿病，糖尿病不分年龄。	Neutral	2025-10-15 12:32:31	2	U2340
美女，一天吃二十个西瓜，几十斤这么厉害，吃得下	Neutral	2025-10-14 23:31:41	2	U2341
四十四了也没有酮症酸中毒厉害[赞]我姐你真难杀[捂脸][捂脸][捂脸][捂脸][捂脸]	Neutral	2025-10-14 22:18:22	2	U2342
@Fuffu 因为我盗汗严重且晚上要喝很多水，所以我总是担心自己得糖尿病	Neutral	2025-10-13 23:11:18	2	U2343
我糖尿病之前也没有症状但是我爱发脾气	Neutral	2025-10-13 21:30:44	2	U2344
经历跟我一样[捂脸]	Neutral	2025-10-13 20:59:24	2	U2345
这么小就糖尿病，太可惜了，加油控糖💪[赞]	Neutral	2025-10-13 09:32:26	2	U2346
这么漂亮的妹子居然也得了糖尿病	Positive	2025-10-11 01:58:52	2	U2347
买个骑行车	Neutral	2025-10-10 16:22:39	2	U0018
加油美女	Neutral	2025-10-10 16:21:33	2	U0018
44	Neutral	2025-10-08 13:47:03	2	U2348
加油[流泪]	Neutral	2025-10-04 15:01:46	2	U2349
一般懒。又好吃的人容易得	Positive	2025-10-04 13:54:32	2	U2350
疾病退退退	Neutral	2025-10-03 22:32:01	2	U2351
我腰围100了 现在吃完饭还想吃 吃完东西还想喝牛奶 吃水果 吃香瓜	Neutral	2025-10-03 22:00:47	2	U0053
我总是喜欢吃饱饭之后再吃一个苹果 或者是一块瓜 或者是喝牛奶	Neutral	2025-10-03 21:59:28	2	U0053
达葡萄糖，听完我眼睛都睁大了	Neutral	2025-10-03 17:01:49	2	U2352
我最近也是恶心想吐[流泪][流泪][流泪][流泪][流泪]	Negative	2025-10-03 15:29:18	2	U2353
喝饮料？	Neutral	2025-10-03 13:22:35	2	U2354
养猫养狗的朋友都知道，食欲不振，精神萎靡，突然瘦了，都是生大病的表现[黑脸]	Neutral	2025-10-03 05:32:15	2	U2355
高温才是 战斗 我也没新冠	Neutral	2025-10-03 04:25:08	2	U2356
你这是一型糖尿病，不是因为新冠得的	Neutral	2025-10-03 00:52:15	2	U2357
啊，意思是血糖高了不会减下来？	Neutral	2025-10-01 21:23:42	2	U2358
不能完全根除的吗这个病情？	Neutral	2025-10-01 08:45:17	2	U2359
还能恢复不？	Neutral	2025-09-30 09:05:16	2	U2360
现在胰岛素细胞移植也开始发展起来了	Neutral	2025-09-30 02:27:36	2	U2361
还好我不喜欢吃甜的[憨笑]	Positive	2025-09-30 01:03:03	2	U2335
@送1⃣️束花 多喝水多运动	Neutral	2025-09-30 00:09:37	2	U2277
治不好的病[捂脸][捂脸]	Neutral	2025-09-29 18:33:33	2	U2276
你可以试着喝桑叶茶，应该可以控糖的	Neutral	2025-09-29 14:38:25	2	U2275
你好可爱呀[微笑][微笑][微笑]我想和你	Positive	2025-09-29 13:50:06	2	U2192
我也是23年新冠后糖了[流泪]	Neutral	2025-09-29 13:17:01	2	U2193
甜妹	Neutral	2025-09-29 11:49:10	2	U2194
怎么做到的，被西医那帮大傻逼忽悠的呗	Neutral	2025-09-29 11:23:41	2	U2195
有糖尿病血糖的女人不能娶，影响后代，也会容易得糖尿病	Neutral	2025-09-29 11:04:14	2	U2196
不幸的，也是幸运的，加油！！会好起来的	Neutral	2025-09-29 09:10:49	2	U2197
这些都是一步步的过程，最开始怎么引起的？	Neutral	2025-09-29 07:49:16	2	U2198
44[宕机]	Neutral	2025-09-29 06:38:43	2	U2199
都是喝甜水、甜品啥的闹的[九转大肠]	Neutral	2025-09-29 04:30:45	2	U2200
血糖高还是脾胃问题，暴饮暴食	Neutral	2025-09-28 22:20:09	2	U2201
加油	Neutral	2025-09-28 21:58:56	2	U2202
加油，二型会好的，你应该是二型吧	Neutral	2025-09-28 21:58:08	2	U2203
我早上空腹5.9 我胰岛素是正常最高峰的二倍[流泪] 现在控制饮食能不能没事啊[流泪]	Neutral	2025-09-28 21:22:51	2	U2204
20斤西瓜，你这个血糖不得爆	Neutral	2025-09-28 20:08:20	2	U2205
各位平时吃完宵夜别一头就去睡，得呆个一小时左右才睡，不然神仙都救不了，最好还是少吃宵夜[看]	Neutral	2025-09-28 20:00:53	2	U2206
我疫情后去年发现，哎瘦了十几斤。最后查了几天。哎。甲亢[捂脸][捂脸][捂脸][捂脸]	Neutral	2025-09-28 16:15:37	2	U2207
聪明	Neutral	2025-09-28 14:47:19	2	U2208
完蛋了。。。湿疹，痒。。。。	Neutral	2025-09-28 13:57:01	2	U2209
吓死我了幸好我天天健身不喝饮料	Positive	2025-09-28 13:36:56	2	U2210
@哒哒 [呆无辜]	Neutral	2025-09-28 13:28:28	2	U2211
我还记得，当时确实有好多人说阳了以后的症状，有的没有味觉，有的没嗅觉，其中一种就是瘦了，那时候他们还都想瘦了，这么一看，有点可怕[尬笑]	Positive	2025-09-28 12:53:01	2	U2212
打了三针我也糖了，莫名其妙的变成小糖人	Neutral	2025-09-28 12:28:40	2	U2213
你那个湿疹，用了炉甘石洗剂吗[黑脸]	Neutral	2025-09-28 11:17:57	2	U2214
这个病是不是治不好？我有一个亲戚小时候就是糖尿病，现在也没治好，也长不高，最多1.5米	Neutral	2025-09-28 11:08:40	2	U2215
来帮我把把脉[吐舌小狗][吐舌小狗][吐舌小狗] 看看我糖多不多[尬笑][尬笑][尬笑][呲牙][呲牙][呲牙]	Neutral	2025-09-28 09:55:16	2	U2216
一形不是遗传才会吗？没有遗传的不都是二形吗	Neutral	2025-09-28 06:21:06	2	U2191
命大。。。	Neutral	2025-09-28 00:42:13	2	U2190
面无人色了已经。	Neutral	2025-09-27 23:44:49	2	U2189
退退退	Neutral	2025-09-27 23:13:01	2	U2188
我比你好点我是二型[捂脸]我一开始老口渴还老上厕所我就感觉不对了上医院一查空腹血糖15还是19来着忘记了我的糖化血红蛋白是11[流泪]	Positive	2025-09-27 23:12:00	2	U2162
一型的和你说的这些没多大关系，基因问题	Neutral	2025-09-27 22:43:24	2	U2163
我糖也比较高，住院住了一个星期，现在还好胰腺炎	Positive	2025-09-27 22:15:53	2	U2164
别名消渴症，喝水不解渴，喝水加上津液可解渴	Neutral	2025-09-27 21:49:25	2	U2165
没有说清楚得糖尿病的原因。只是说了发病的时间表现。	Neutral	2025-09-27 21:00:39	2	U2166
我也是拖到了酮中毒扛不住了去医院，结果是二型[捂脸]	Neutral	2025-09-27 20:49:30	2	U2167
全程在庸医的呵护下 越走越远 记住 医生职业80%都是庸医	Neutral	2025-09-27 20:30:53	4	U2168
完蛋操了，我天天都很渴	Neutral	2025-09-27 20:01:16	2	U2169
44我的天 我空腹23就诱发脑梗了现在在医院治疗[流泪]	Neutral	2025-09-27 19:08:32	2	U2170
你没有慢病报销吗？	Neutral	2025-09-27 18:53:52	2	U2171
……完全一样[无语流汗]	Neutral	2025-09-27 18:29:43	2	U0026
[无语流汗]我也是阳了一后，持续低温……然后高血糖	Neutral	2025-09-27 18:27:37	2	U0026
加油	Neutral	2025-09-27 14:58:56	2	U2172
你信不信干细胞[柴犬]	Neutral	2025-09-26 03:52:09	2	U0032
我一直都很瘦六十 七十几斤，但胃口不好吃的少，	Positive	2025-09-19 11:55:06	2	U2173
工地一天两三w步，应该没事吧	Neutral	2025-09-18 10:44:59	2	U2161
好像杨超越	Positive	2025-09-16 10:40:11	2	U2174
漂亮善良的女孩[玫瑰][玫瑰]	Positive	2025-09-15 22:37:29	2	U2176
打了新冠疫苗后吗？	Neutral	2025-09-27 22:06:07	2	U2177
疾病退退退	Neutral	2025-09-15 22:29:35	2	U2178
真能从别人脸上看出来是否健康啊	Neutral	2025-09-14 14:37:58	2	U2179
多饮多食多尿	Neutral	2025-09-13 00:05:37	2	U2180
@	Neutral	2025-09-12 18:57:33	2	U2181
1型人都长得很漂亮皮肤白	Positive	2025-09-11 20:44:34	2	U2182
你吃完饭运动吗？	Neutral	2025-09-09 17:34:21	2	U2183
这美颜也太牛了[流泪][流泪][流泪][流泪][流泪]	Neutral	2025-09-09 12:13:02	2	U2184
现在的年轻人就是使劲作，每天奶茶饮料各种甜食使劲吃就不听劝，到最后害了自己害了家人[尬笑][尬笑]	Neutral	2025-09-08 12:01:02	2	U2185
这么年轻暴饮暴食不自律，听着你说话就一副无所谓轻佻的样子，得这个病太正常不过了，还扯上新冠还有点责怪上家人了	Neutral	2025-09-08 10:12:09	2	U2186
我弟也是这样比你当初还严重，他几乎就是皮包骨了，	Neutral	2025-09-08 01:45:52	2	U2187
宝贝你不要减肥 你瘦的时看起来命好苦的样子[尬笑]	Positive	2025-09-07 23:12:38	2	U2217
你是怎么努力成功的?	Neutral	2025-09-06 16:23:34	2	U2218
这么年轻，这么瘦。看看有没黒棘皮	Neutral	2025-09-06 06:58:01	2	U2219
高血糖还吃二十多斤西瓜，厉害[赞]	Neutral	2025-09-05 19:15:56	2	U2248
看个人体质，我父亲69岁了，1993年开饭店开始，每天两三罐红牛，32年了，一个月最少一百瓶红牛，现在年纪大为什么还要喝，因为他现在还在做夜市生意，每天熬夜到两三点，	Neutral	2025-09-04 19:23:15	2	U2250
天啊，这是一点胰岛素都没有了[流泪]	Neutral	2025-09-04 00:00:56	2	U2251
你这就是缺乏锻炼。[尬笑]	Neutral	2025-09-02 05:58:45	2	U2252
废话真多	Neutral	2025-09-01 23:14:00	2	U2253
疾病远离我（无副作用）	Neutral	2025-08-31 01:30:30	2	U2254
草了 我154斤[流泪]	Neutral	2025-08-29 23:32:07	2	U2255
糖尿病与新冠无关呀[捂脸][捂脸][捂脸]	Neutral	2025-08-29 20:03:11	2	U0005
你应该是去医院查得到的吧？	Neutral	2025-08-29 12:11:33	2	U2256
这是同一个人吗[尬笑]	Neutral	2025-08-28 21:51:18	2	U2257
(°_°)…不看医生看百度是吧	Neutral	2025-08-28 08:41:42	3	U2258
可怜的娃	Neutral	2025-08-27 23:42:28	2	U2259
可怜的娃，我带你一起健康，关注我	Neutral	2025-08-26 20:44:44	2	U2260
[赞][赞][赞][玫瑰]胰岛素要陪伴你喽	Neutral	2025-08-26 15:17:49	2	U2261
我们家族糖尿病，我表弟30得了，我从来都做饭吃，不在外面吃饭，从不喝饮料，要么白开水，要么茶水，偶尔吃当季的农民自己种的水果，只吃当季菜，撑到42了，没得[捂脸]	Neutral	2025-08-25 22:46:18	2	U2262
面黄肌瘦啊，	Neutral	2025-08-25 16:43:48	2	U2263
我直接长胖 肯定没有糖尿病了[黑脸]	Neutral	2025-08-24 23:07:33	2	U2264
我天，我也感觉有点渴还湿疹了	Neutral	2025-08-24 20:07:42	2	U2265
恭喜你挺过来了，我现在还没缓过来，心情还是极差	Negative	2025-08-24 17:30:15	2	U2266
我这个呢[泣不成声]	Neutral	2025-08-24 16:52:51	2	U2267
还去打了一罐葡萄糖[憨笑]	Neutral	2025-08-24 16:40:35	2	U2268
我一个月前酮症酸中毒进了ICU。	Neutral	2025-08-24 00:06:55	2	U2269
暴瘦20斤的高血糖人士路过！[捂脸][捂脸]	Neutral	2025-08-23 23:08:21	2	U2270
感谢分享	Neutral	2025-08-23 09:05:10	2	U2271
那我没感染怎么回事	Neutral	2025-08-22 19:02:20	2	U2272
@揽月. 我怀疑我是不是糖尿病，我就会有事没事想喝水，我想去插个血	Neutral	2025-08-22 00:38:41	2	U2273
是不是为了减肥低碳饮食，把胰岛素给整没活干了，然后一生病免疫系统开启就把薄弱的胰岛素干没了	Neutral	2025-08-21 23:23:28	2	U2274
扯上新冠干嘛？	Neutral	2025-08-29 20:02:30	2	U0005
[捂脸]	Neutral	2025-08-21 20:39:40	2	U2249
咱俩一模一样，我血糖高到46，酮症酸中毒[捂脸]	Neutral	2025-08-21 20:36:41	2	U2247
喝饮料缓解？[恐惧]	Neutral	2025-08-21 16:07:55	2	U2220
天天喝奶茶，你不得谁得啊[捂脸]	Neutral	2025-08-21 08:42:00	2	U2246
我也是新冠低温二型糖尿病[苦涩][苦涩]	Neutral	2025-08-21 06:55:43	2	U2221
还要输葡萄糖[捂脸][捂脸]	Neutral	2025-08-20 16:42:23	2	U0116
疾病远离我	Neutral	2025-08-20 09:09:05	2	U2222
你这也太离谱了，样样都踩在刀刃上。	Neutral	2025-08-20 08:21:43	2	U2223
啥都偏方就是不肯去医院，不病到快死也不肯去医院，去医院要跟家人商量 自己没有腿去不了[尬笑]	Neutral	2025-08-19 23:47:39	2	U2224
我也是低烧[流泪]	Neutral	2025-08-18 20:26:43	2	U2225
想起了自己当年也是葡萄糖➕白粥，晚上直接昏迷了半夜救护车才被确诊	Neutral	2025-08-18 18:38:58	2	U2226
我也是瘦多囊，胰岛素抵抗，我每餐吃的比你的主食还少，但还是晕，一天睡十几个小时。现在16+8轻断食，主食换成玉米，改善了很多。	Neutral	2025-08-18 00:31:20	2	U2227
谢谢你的祝福，祝你早日康复[流泪]也不知道糖尿病能不能康复，就住以后胰岛素免费吧[抱抱你]可以从各种载体上制造	Neutral	2025-08-17 10:18:52	2	U2228
听你说这些经历中间但凡你来一次正规医院早点能发现了	Neutral	2025-08-17 08:37:03	2	U2229
@🌈无妄- [泣不成声][泣不成声]	Neutral	2025-08-17 02:51:27	2	U2230
我6.9是不是糖尿病	Neutral	2025-08-16 07:14:46	2	U2231
多吃辣、醋，吃饭先吃口菜再吃 口肉再小口吃饭，吃的时候多嚼嚼嚼碎了，不要直接吞[杀马特]	Neutral	2025-10-18 03:06:52	2	U0047
糖尿病不是吃甜引起吧，我老父一生爱吃糖，活到91岁，食道癌走	Neutral	2025-09-08 20:54:18	2	U2232
截肢又不疼，大不了截就是了	Neutral	2025-01-07 11:56:47	1	U2233
千万不敢喝饮料，千万不敢喝饮料	Neutral	2025-01-07 09:22:58	2	U2234
太吓人了吧[捂脸][捂脸]我也是二型糖尿病，天热也会经常喝饮料。	Neutral	2025-01-07 16:33:51	2	U2235
五六十年代的人，煮饭是筛子了辽饭，过滤了米汤所以很少有糖尿病	Neutral	2025-04-10 22:14:44	2	U2236
这颜色是真的吗	Neutral	2025-01-07 11:29:45	2	U2237
我婆母的也是糖尿病祖，从脚趾烂的膝盖，目前刚过世	Neutral	2025-01-07 10:53:37	2	U2238
我的脚指甲开始掉了，也不疼	Neutral	2025-06-26 16:17:09	1	U0058
那主食应该是吃什么	Neutral	2025-09-03 18:42:07	2	U0037
糖尿病首先要忌口，第二加强体育锻炼，不然有并发症了就晚了。	Neutral	2025-01-22 01:30:47	2	U2239
留着减肥看	Neutral	2025-08-27 03:25:06	2	U2240
@阿婷 好疼	Neutral	2025-06-06 19:41:31	1	U2241
太吓人了	Neutral	2025-03-06 20:39:09	2	U2242
一顿三碗米饭 有什么问题吗	Neutral	2025-06-23 14:01:10	2	U2243
刚开始的时候我差点就吐了	Negative	2025-09-22 12:29:37	2	U2244
糖尿病这么可怕？	Neutral	2025-01-07 09:03:30	2	U2245
还好我戒掉米饭了	Positive	2025-04-19 12:35:20	2	U2856
@何包鼓鼓 [暗中观察]	Neutral	2025-08-26 20:33:49	2	U2857
我爸天天吃几大勺白糖，说吃糖对身体好，我跟他说不要吃那么多糖尿病就麻烦，他不听	Neutral	2025-01-07 15:50:09	2	U2858
[色][比心][色][尬笑][呲牙][色][比心][尬笑][赞][发呆]	Neutral	2025-06-22 22:01:33	2	U3323
看着都痛	Neutral	2025-04-03 00:35:02	2	U3471
@我是个憨憨 [衰]	Neutral	2025-06-05 18:09:40	2	U3472
一次看到后，那样子我现在还忘不了[捂脸]	Neutral	2025-08-27 02:02:55	2	U3473
[抱抱你]我再也不吃任何甜食了@NGC2237 @春景 @番茄炒地球 @海马海马	Neutral	2025-06-21 01:14:17	2	U3474
大夫我好了，我先走了，我得看看我爸是男的女的	Neutral	2025-09-14 03:36:09	2	U3475
[干饭人][干饭人][干饭人][干饭人][干饭人][杀马特][杀马特][杀马特][杀马特]	Neutral	2025-09-08 18:07:46	2	U3476
	Neutral	2025-09-05 01:42:50	2	U3477
开头吓死我了[泣不成声]@事干大坝	Neutral	2025-08-25 20:47:08	2	U3478
	Neutral	2025-08-24 22:13:23	2	U3479
饮料不离手，你带米饭干啥	Neutral	2025-08-12 16:57:20	2	U3480
看着都痛[衰]	Neutral	2025-08-12 13:00:34	2	U3481
好害怕，	Neutral	2025-07-27 03:16:49	2	U3482
默默放下了手里的可乐[流泪]	Neutral	2025-07-23 13:46:09	2	U3483
我胆子太小了，看着太吓人了因为我也是小糖人	Neutral	2025-07-19 21:36:29	2	U3484
老爷子比这个还严重，七十了，切了半个肺，做了支架，最近状态特别差，还敢不敢做截肢，空腹血糖都在二十左右	Negative	2025-07-18 03:33:07	2	U3485
和烟 没多大关系，我们村 老头老太太都是80-100之间的 我爷爷奶奶也抽烟，我奶奶90多了 再过几年100了 村里的老头也都差不多，喝酒的不一样门口池塘死的都是十几岁到40多的，淹死的酒精中毒的 ，冻死的。淹死的最多，一死就好几个。	Positive	2025-06-21 08:29:34	2	U3486
	Neutral	2025-06-19 01:13:02	2	U3487
@炯 [尬笑]	Neutral	2025-06-09 10:29:29	2	U3488
@沐 [舔屏]	Neutral	2025-03-16 06:37:32	2	U3489
[666][666][666]	Neutral	2025-01-07 20:14:11	2	U3490
[666][666][666]	Neutral	2025-01-07 18:57:53	2	U3491
[666][666][666]	Neutral	2025-01-07 14:07:26	2	U3492
[666][666][666]	Neutral	2025-01-07 14:02:07	2	U3493
[666][666][666]	Neutral	2025-01-07 13:53:18	2	U3494
[恐惧]	Neutral	2025-01-07 13:37:58	2	U3495
@这	Neutral	2025-01-07 12:15:36	2	U3470
[感谢][感谢][感谢]	Neutral	2025-01-07 08:56:48	2	U3468
[捂脸][捂脸][捂脸]	Neutral	2025-01-07 08:21:37	2	U3441
[惊恐]	Neutral	2025-01-06 19:24:19	2	U3467
我靠，这还是肉吗	Neutral	2025-12-04 16:52:27	2	U3442
@@永困😪 饮料奶茶当水喝就这样	Neutral	2025-11-07 11:52:57	2	U3443
南方人 哪个不吃 米饭 ？？	Neutral	2025-10-16 13:18:30	2	U3444
天呐佩服当医生的看的要干呕	Neutral	2025-10-16 13:14:23	3	U0057
@一首情歌。 看看，烟不离手，饮料不离口	Neutral	2025-10-14 18:18:30	2	U3445
我吃东西呢	Neutral	2025-10-12 13:23:34	2	U3446
为什么我好想给他掏干净	Neutral	2025-10-09 01:01:01	2	U3447
这就是尸臭阿	Neutral	2025-09-28 00:06:51	2	U3448
@看海. 我靠	Neutral	2025-09-25 08:54:58	2	U3449
谁把疼痛共享开了？	Neutral	2025-09-17 00:22:58	2	U3450
不好，家人们快跑！[流泪]	Neutral	2025-09-15 12:25:31	2	U3451
我擦，太恐怖了[发呆]	Neutral	2025-09-14 15:55:27	2	U3452
没钱吃饭饿两天了	Neutral	2025-09-13 01:05:37	2	U3453
这都腐烂了，根本没发弄了。	Neutral	2025-09-11 23:37:52	2	U3454
一般高血压并发症多，可能药物有关	Neutral	2025-09-10 19:41:41	2	U3455
吓人	Neutral	2025-09-06 18:14:55	2	U3456
三碗打死我也吃不下[捂脸]	Neutral	2025-09-05 00:51:49	2	U3457
米饭也不行么	Neutral	2025-09-04 10:40:28	2	U3458
这玩意儿有什么传播途径吗？比如说一起吃饭，用碗筷这些[九转大肠]	Neutral	2025-01-07 16:23:49	2	U3459
不吃米饭，吃什么？	Neutral	2025-08-29 18:51:07	2	U3460
我不爱喝饮料，不爱吃米饭，不爱喝奶茶，应该不会血糖高啊，我直接低血糖晕倒了[泪奔][泪奔][泪奔]	Neutral	2025-10-14 19:39:44	2	U3461
不控制吗[发呆]	Neutral	2025-01-07 12:12:02	2	U3462
24年护考的一道图片题	Neutral	2025-01-07 15:24:36	2	U0115
我婆婆糖尿病一顿要吃三碗米饭，叫她少食多餐偏偏不听，现在我老公奶奶也是糖尿病正在烂脚，每天那种臭味简直了	Neutral	2025-03-11 23:35:57	2	U3463
我公公一直一天两盒烟，去年我婆婆说里，我说让少抽点，抽多了对身体不好，我婆婆说：外一年四季感冒都不感冒，一点咳嗽都没有。今年说是糖尿病，我话都么接。	Neutral	2025-01-07 14:24:26	2	U3464
得糖尿病并不是每天吃了好多糖，	Neutral	2025-01-07 18:59:31	2	U3465
糖尿病是让伤口没法愈合！免疫力下降！只是伤口！人好的就没事！血糖等一系列问题可以多问问医生！	Positive	2025-01-07 13:29:00	2	U3466
我好几个亲戚都是糖尿病去世的	Positive	2025-01-07 17:36:56	2	U0117
@万肥肥🌊 @崇拜 @Poem @zxl @无名的人 @SDFJDNR @SDFJDNR @SuperQi⚡ 啊啊啊啊啊啊啊啊啊啊啊啊啊啊啊	Neutral	2025-02-08 16:24:11	2	U3496
@￴￴ ￴ @￴ @同心圆🤍 @超绝奶滴嘎 @xxxx_28 @念淇拾壹月 @不如早睡 @须尽欢 @o.O6kk1 @纵火 @Glh @睁着眼 @ToT @Snowlt @天际. @瑓. @-i7- @o^-^o @说了再见 @栀子生椰双倍奶油 @乌岩祖. @宇宙无敌蓝色裤头猫 @岁岁年年 @贾肥肥 @小妖怪 @34 @叶萧赟Yuen @oio @ene	Neutral	2025-02-12 23:40:43	2	U3469
@叁玖 别吃太多[暗中观察]	Neutral	2025-03-06 19:06:37	2	U3497
烂烂的脚趾里面挖呀挖呀挖	Neutral	2025-01-07 11:25:09	2	U3527
@兔子🐰Stanley	Neutral	2025-03-01 08:52:58	2	U3529
@叫涵涵好了💤 我的妈开头咋不打马赛克[我想静静][我想静静][我想静静][我想静静][我想静静][我想静静][我想静静][我想静静]	Neutral	2025-01-30 19:32:56	2	U3530
@向晚归 @🌈奈何🌈 看到猛干两碗饭	Neutral	2025-01-17 16:53:42	2	U3531
一点痛感都没有么！	Neutral	2025-09-03 00:37:52	2	U3532
我的外公就是脚都烂完了最后痛死的一天天叫换	Neutral	2025-01-09 20:41:06	2	U3533
大夫手也染黑了	Neutral	2025-01-07 21:28:19	2	U3534
@JzjZ 啊啊啊	Neutral	2025-08-27 14:27:12	2	U3535
@@🌈小雨大大🌈	Neutral	2025-01-07 16:08:18	2	U3536
@白茶清欢😇 @安然自若	Neutral	2025-01-07 16:07:26	2	U3537
我婆婆不信邪，她说听别人说，哪有那么严重，给她买的控血糖的药，叫她一天吃一颗，买的一年的药，结果她两个月就吃完了，我们说了她，结果她来句“可我吃了没啥事”，整得我们都对她无语了，再也不管她了。随便她，爱咋地咋地吧	Neutral	2025-01-07 15:01:04	2	U3538
不带手套？	Neutral	2025-08-22 18:05:06	2	U3539
	Neutral	2025-01-07 15:27:45	2	U3540
我爸也是烂了两个洞，看到骨头了。	Neutral	2025-01-07 15:09:00	2	U3541
少吃点好	Neutral	2025-01-07 14:27:49	2	U0114
害怕	Neutral	2025-01-07 13:55:32	2	U3542
这么严重啊	Neutral	2025-01-06 20:15:55	2	U3543
饮料里面的甜味剂太多了	Neutral	2025-01-07 13:21:12	2	U3544
这样挖不疼吗[囧]看着都疼	Neutral	2025-01-07 12:45:05	1	U3545
退退退	Neutral	2025-01-07 10:45:43	2	U3546
咦	Neutral	2025-05-22 12:54:09	2	U3547
卧槽。	Neutral	2025-08-27 20:18:18	2	U3548
医生有强大的心理承受能力	Neutral	2025-08-27 00:20:56	3	U3549
放弃我爸大拇指里面烂透了腐烂很严重感染到旁边的指头 后来东跑跑看看西跑跑看看不知不觉就莫名其妙好了	Neutral	2025-01-07 18:13:28	2	U3550
那个时候营养不良，	Neutral	2025-05-13 17:31:01	2	U3551
看得我龇牙咧嘴[吐血]	Neutral	2025-08-26 16:38:16	2	U3552
这只脚是真的？？	Neutral	2025-01-07 13:21:56	2	U3553
我做了活检，医生说让我去上海看	Neutral	2025-03-05 19:59:33	3	U3528
@小小曹¹² 劳资再也不喝饮料了[九转大肠]	Neutral	2025-02-18 00:29:11	2	U3526
[憨笑]坏了，痛感共享了，刚一看就感觉右脚趾就开始疼了	Neutral	2025-08-22 23:04:21	1	U3499
@一昂杨 少喝奶茶咖啡[绝望的凝视]	Neutral	2025-05-03 00:02:03	2	U3525
我婆婆也是糖尿病现在手脚嘴唇长白斑什么都吃不忌口	Neutral	2025-08-18 12:13:28	2	U3500
渗人	Neutral	2025-01-09 20:35:16	2	U3501
好可怕我不想死我还想活到这世界上	Neutral	2025-04-25 14:28:18	2	U3502
太吓人了！我就喜欢吃甜的！	Neutral	2025-01-07 15:06:48	2	U3503
空腹血糖忽高忽低的	Neutral	2025-01-07 14:47:08	2	U3504
吓得我抽支烟	Neutral	2025-01-07 14:10:31	2	U3505
我现在黑棘皮病，胰岛素抵抗，减肥！！减肥！！！	Neutral	2025-01-07 04:53:39	2	U3506
@11点就睡觉	Neutral	2025-11-25 13:51:22	2	U3507
@天秤	Neutral	2025-12-04 14:51:07	2	U3508
@Sssssss。	Neutral	2025-12-04 01:12:06	2	U3509
@Kitty @大鹅又瘦了. @-断誓永别 @4️⃣哥	Neutral	2025-11-25 02:04:24	2	U3510
耍了好几年抖音，第一次谈到这么直接不打玛的视频[泪奔]	Positive	2025-09-15 12:58:57	2	U3511
@开车手杰克 @淡淡	Neutral	2025-11-21 15:25:50	2	U3512
@小优 @宴少. 帝者戰神𒉭 @叶知秋	Neutral	2025-07-03 21:53:29	2	U3513
@等个日出吗.	Neutral	2025-05-30 11:24:44	2	U3514
@随意	Neutral	2025-05-21 19:09:24	2	U3515
@焄 @布鲁布鲁布鲁	Neutral	2025-02-08 13:20:33	2	U3516
@爱她的天真.	Neutral	2025-03-07 14:19:35	2	U3517
@椰zi	Neutral	2025-09-28 20:23:59	2	U3518
@Ghliying	Neutral	2025-03-14 12:04:58	2	U3519
@代汉群	Neutral	2025-02-11 14:39:06	2	U3520
@邪道尽头谁为峰	Neutral	2025-01-30 02:12:29	2	U3521
@我服了爸爸 @愤怒的无敌爆龙战士886 @叽里呱啦拉 @ing.	Neutral	2025-03-12 22:32:59	2	U3522
@多余	Neutral	2025-01-07 15:39:17	2	U3523
@宇宙级大帅哥	Neutral	2025-09-05 06:08:09	2	U3524
@卖二手车的（小冉）	Neutral	2025-08-30 19:57:57	2	U3498
@WALKYRIE @z z h. @是 昊 @^ @带盲人参观博物馆	Neutral	2025-08-30 09:59:22	2	U3440
@系章温并、	Neutral	2025-08-29 17:08:01	2	U3439
@青语	Neutral	2025-08-27 16:53:45	2	U3438
@彦 @齐楊	Neutral	2025-10-01 00:46:25	2	U3355
@牛牛	Neutral	2025-02-10 17:06:13	2	U3356
@赢你人生，悔我青春	Neutral	2025-08-18 21:19:28	2	U3357
@冬枳_lilneasi @别哭 @Eyernity @7iovo. @good	Neutral	2025-08-02 17:29:30	2	U3358
@囍`	Neutral	2025-03-15 21:45:17	2	U3359
@B卜子	Neutral	2025-10-01 02:06:06	2	U3360
@wj	Neutral	2025-03-01 14:20:45	2	U3361
@帅哥.	Neutral	2025-02-14 20:12:55	2	U3362
@美丽绝育母蟑螂 @Lx	Neutral	2025-02-08 14:57:51	2	U3363
@焦糖三分甜、	Neutral	2025-09-17 07:12:20	2	U3364
@㭍.	Neutral	2025-06-26 11:57:47	2	U3365
@猪弄弄	Neutral	2025-06-17 18:21:18	2	U3366
@栾廷玉 @篾块炒肉 @左 飞 @✌ @复合体 @土豆睡不着 @泽欧 @我不是愣头青	Neutral	2025-06-13 23:23:05	2	U3367
@春	Neutral	2025-09-04 20:51:01	2	U3368
@笨的、聪明蛋	Neutral	2025-09-25 22:55:34	2	U3369
@阴霾	Neutral	2025-05-29 15:29:14	2	U3370
@奈奈子😈	Neutral	2025-08-28 15:28:16	2	U3371
@小8️⃣ ²⁰²⁵	Neutral	2025-05-28 18:33:50	2	U3372
@何以断心 @一二	Neutral	2025-11-01 01:50:06	2	U3373
@家有母老虎 @小雅（自律版）	Neutral	2025-05-27 19:19:40	2	U3374
@……	Neutral	2025-10-08 10:32:47	2	U3375
@૮₍ ˶•ᴗ•˶₎ა @🐛🐛🐛🐛🐛🐛 @՞˶･֊･˶՞	Neutral	2025-07-06 19:19:45	2	U3376
@香山红叶	Neutral	2025-01-17 23:37:07	2	U3377
@白人奥納納🧤🇲🇴🇲🇴🇲🇴	Neutral	2025-05-23 14:40:51	2	U3378
@两年半 @线	Neutral	2025-05-29 16:06:45	2	U3379
@无敌暴龙战士.	Neutral	2025-10-17 01:41:52	2	U3354
@早早	Neutral	2025-05-10 00:56:43	2	U3353
恐怖	Neutral	2025-01-07 12:09:11	2	U3352
@🌈Joker Xue @AnKe-Poi @Yuᴗu	Neutral	2025-05-27 12:21:39	2	U3351
@困困小面包	Neutral	2025-10-17 13:21:52	2	U3325
@美美·	Neutral	2025-05-21 18:05:15	2	U3326
@沙漠海	Neutral	2025-09-13 21:33:39	2	U3327
你这油也太多了，还控糖啥，升糖吧	Neutral	2025-05-21 20:32:13	2	U3328
那碗清水	Neutral	2025-05-04 22:11:08	2	U3329
@太有才了。谢谢分想你的才艺给我[赞][赞][赞][赞][赞][赞][赞][赞][爱心][爱心][爱心][爱心][爱心][爱心][爱心][爱心][玫瑰][玫瑰][玫瑰][玫瑰][666][666][666][666][666][666]	Neutral	2025-01-22 11:15:00	2	U3330
淀粉不是升糖吗？	Neutral	2025-04-17 21:09:26	2	U3331
这些我家都在吃，确实挺好的，配合方法，我现在好转了。好运传给大家	Positive	2025-03-29 16:39:56	2	U3332
油太大了	Neutral	2025-05-21 22:55:25	2	U3333
看起来很有食欲[赞][赞]	Neutral	2025-08-14 11:19:10	2	U3334
听到什么薄薄的厚片我都马上划走	Neutral	2025-07-10 17:16:35	2	U3335
@	Neutral	2025-04-25 18:22:39	2	U3336
@谢谢交我们	Neutral	2025-03-12 00:08:53	2	U3324
[赞][赞][赞][赞][赞][赞][赞]	Neutral	2025-05-03 10:22:01	2	U3337
@	Neutral	2025-03-05 16:55:01	2	U3339
糖尿病不样吃淀粉	Neutral	2025-03-31 00:26:32	2	U3340
照做试试看唐能将下来不	Neutral	2025-03-31 11:01:59	2	U3341
1	Neutral	2025-03-28 09:31:24	2	U3342
[爱心][爱心][爱心][爱心]@@	Neutral	2025-03-14 21:23:51	2	U3343
@[666]	Neutral	2025-02-23 22:04:24	2	U3344
油这么多，胆固醇会偏高	Neutral	2025-03-25 18:27:44	2	U3345
看着就好吃	Positive	2025-06-28 18:36:19	2	U3346
点赞欢迎主播[赞][赞][赞][赞][感谢][感谢][感谢][感谢][感谢][鼓掌][鼓掌][鼓掌][鼓掌]	Neutral	2025-03-28 19:49:01	2	U3347
控糖食谱你淀粉勾芡?你真是沟子里长癣，害人不浅啊[捂脸]	Neutral	2025-09-07 12:29:37	2	U3348
别太下饭了，多吃两碗血糖又上去了	Neutral	2025-06-19 00:00:30	2	U3349
又薄薄又厚片，矛盾不	Neutral	2025-02-25 19:21:09	2	U3350
这样做法不能降糖	Neutral	2025-11-03 05:51:18	2	U3380
[赞][赞][赞][赞][赞][发呆][赞][赞][赞][赞]	Neutral	2025-04-23 10:43:48	2	U3381
家里煮菜的，其实可以不加淀粉更健康	Neutral	2025-02-15 18:02:34	2	U3382
耗油不生糖么[捂脸]	Neutral	2025-06-27 00:14:27	2	U3411
这些素菜放的调味品太多了，在家里做不好！	Neutral	2025-03-13 08:18:39	2	U3413
	Neutral	2025-02-01 10:54:12	2	U3414
瞎鸡扒做	Neutral	2025-08-23 00:41:26	2	U3415
	Neutral	2025-06-22 18:32:08	2	U3416
[赞][赞][赞]	Neutral	2025-04-14 21:48:14	2	U3417
[发怒]	Neutral	2025-04-05 16:57:53	2	U3418
[赞]	Neutral	2025-03-29 17:19:13	2	U3419
[比心][比心][比心][比心][比心]	Neutral	2025-03-23 07:35:51	2	U3420
看这个炒牛肉的油量就有控不下来的担忧	Neutral	2025-03-18 18:18:11	2	U3421
[赞][赞][赞][赞][赞][赞]	Neutral	2025-03-16 09:55:05	2	U0003
[比心][比心][比心][比心][比心][比心][比心][比心]	Neutral	2025-03-02 22:05:39	2	U3422
[比心][比心][比心]	Neutral	2025-03-02 13:31:14	2	U3423
这么做不升血糖？	Neutral	2025-02-28 23:12:31	2	U3424
[哈欠]	Neutral	2025-02-25 18:28:49	2	U3425
没有味精就没灵魂	Neutral	2025-02-12 07:59:28	2	U3426
鸡精不要吃	Neutral	2025-02-10 04:49:03	2	U3427
这真的控糖吗？[捂脸][捂脸][捂脸]	Neutral	2025-02-02 22:20:42	2	U3428
@	Neutral	2025-02-02 17:05:17	2	U3429
[感谢][赞][赞][赞]	Neutral	2025-01-30 12:12:44	2	U3430
@弋[泣不成声]	Neutral	2025-01-16 12:08:18	2	U3431
[666][666][666]	Neutral	2025-01-15 22:25:49	2	U3432
[赞][赞][赞][鼓掌][鼓掌][鼓掌]	Neutral	2025-01-11 22:14:06	2	U3433
不错不错值得推荐[赞][赞][赞]	Neutral	2025-01-11 07:11:50	2	U3434
[赞][赞][赞][赞][赞][赞]	Neutral	2025-01-10 17:11:07	2	U3435
@飞翔的云	Neutral	2025-03-04 18:35:56	2	U3436
你这些菜真的对小糖人好吗？特别是胡萝卜和淀粉	Neutral	2025-02-06 03:02:22	2	U3437
你确定这样大尿病的人能吃，一天到晚就知道误人子弟	Neutral	2025-05-22 22:32:20	2	U3412
糖尿病人可以吃猪油，五花肉，几下就整死了	Neutral	2025-05-28 09:27:29	2	U3410
不知道你们咋控糖的，我二型，没吃药我就酷酷运动，一天两场有氧，瘦了二.十斤，自己弄了个食谱坚持吃，馋了就吃顿火锅，就感觉没啥[耶]	Neutral	2025-06-03 08:58:51	2	U3383
拉倒吧，又是五花肉，又是耗油	Neutral	2025-07-18 15:55:27	2	U3409
不让下载，正能量不让传递，只为引流，这算善举还是打着帮助别人的旗号，骗取流量和私利，必须屏蔽拉黑此帐号，支持的跟上	Neutral	2025-05-22 10:53:52	2	U3384
我二糖好几年了，现在空腹5.多了，手脚都不麻了，只有经历了才知道有多不容易，谁需要可以分享一下[流泪][流泪][一起加油]	Positive	2025-06-25 09:25:14	2	U3385
这样做的菜能控糖，笑死人，鬼都不信	Neutral	2025-05-07 03:19:01	2	U3386
谁唐高我有.办法，稳定不反弹[V5]	Neutral	2025-04-21 00:55:52	2	U3387
关于糖尿病，我关注了不止上百个三甲医院的医生，说这几样不能吃，那几样不能吃，一百个医生就是上千样东西不能吃，还有的医生说这几样可以吃，那几样也可以吃，有一百个医生就是上千样东西可以吃，总结起来就是什么都不能吃，又什么都可以吃[捂脸][捂脸][捂脸]	Neutral	2025-02-26 11:28:11	3	U3388
不要盲目跟风！适合自己的才行！我五年前1.6现在5.5！正常吃喝[赞]	Neutral	2025-05-30 00:20:09	2	U3389
别误导人啊，你这样的糖尿病人根本不管吃，油这么多还有五花肉	Neutral	2025-02-20 08:22:21	2	U3390
尽瞎说八道了，西芹的根部最嫩了最好吃了	Positive	2025-02-06 11:44:16	2	U3391
炒这么油，就算血糖不高，血脂也该上了吧	Neutral	2025-02-22 13:55:18	2	U3392
我今天开始学，练一个月看结果	Neutral	2025-08-16 21:21:28	2	U3393
大爷啥叫每侧50次 有几侧	Neutral	2025-08-25 18:13:34	2	U3394
糖叔谢谢你的降糖动作[赞][赞][赞][赞][赞]	Neutral	2025-06-04 16:41:57	2	U3395
还有得救吗[流泪]餐二22，睡前18都有	Neutral	2025-08-16 10:08:32	2	U3396
谢谢唐叔分享，明天开始锻炼，期待有结果[赞][赞][赞][赞][赞][赞]	Neutral	2025-11-03 22:21:45	2	U3397
	Neutral	2025-07-08 03:00:03	2	U0100
你另一个控糖操视频和你老婆一起是做的一个动作，那个有效果还是这个操有效果	Neutral	2025-08-25 17:22:51	2	U3398
我6.56一个月后见	Neutral	2025-06-04 16:05:17	2	U3399
空腹7.2，今天开始练一个月后见。	Neutral	2025-10-13 20:19:49	2	U3400
[玫瑰][玫瑰][玫瑰]	Neutral	2025-11-04 09:21:52	2	U3401
血糖高人太瘦了，怎么能胖起来？[感谢][感谢]	Neutral	2025-08-21 22:05:33	2	U3402
血糖高糖尿病 可以吃牛肉自助餐吗 只吃牛肉羊肉 饮料水果不吃那种	Neutral	2025-08-20 08:54:54	2	U3403
请向危师，，每天什么时候练习	Neutral	2025-07-16 10:57:21	2	U3404
[爱心][爱心][爱心][爱心][爱心][爱心][爱心][爱心][爱心][爱心][爱心][爱心][爱心][爱心][爱心]	Neutral	2025-11-27 17:35:25	2	U0042
我一般都是晚饭后做，累了就睡觉了	Neutral	2025-11-22 19:29:21	2	U3405
收藏从不间断，懒得从不开干[捂脸][捂脸]	Neutral	2025-04-24 07:48:46	2	U0044
目前我是6.9真担心了，我今天开始炼一个看看有没有效果	Neutral	2025-11-29 11:00:26	2	U0046
干脆利落，没有废话，值得点赞[赞][赞][赞][赞][赞]	Neutral	2025-04-07 05:40:03	2	U3406
有效果的	Neutral	2025-09-29 20:49:55	2	U0048
有用吗.天天什么时候练.我现在都7点了.有点焦虑[捂脸][捂脸]	Neutral	2025-05-29 08:56:13	2	U3407
糖叔好想知道一天做几次好？	Neutral	2025-08-05 22:59:21	2	U3408
我今天开始练[赞][赞][赞]	Neutral	2025-05-11 07:51:55	2	U3554
餐前血糖5.9，最高的时候6.0，查体医生说我糖红蛋白还是那啥6.1，我开始运动第二天了，计划坚持2年，60岁我来晒指标。	Neutral	2025-05-09 07:28:20	2	U3555
生命在于运动，糖友优秀。[666][赞]	Positive	2025-11-23 20:49:14	2	U3556
[赞][赞][赞][赞][赞]	Neutral	2025-11-27 07:47:41	2	U3672
坚持练了七天，从11.3，降到6.8，不过没有停药，今天是第八天了[感谢][感谢][感谢]感谢这位老师的教程，真诚感谢[礼物][礼物][礼物]	Neutral	2025-10-02 08:40:34	2	U3703
[赞]	Neutral	2025-11-23 19:06:37	2	U3704
你毎个视频都是不同的三个动作，到底那三个是真的[捂脸][捂脸][捂脸]	Neutral	2025-12-08 20:56:48	2	U3705
[赞][赞][赞][赞][赞][赞][赞][赞][赞][赞][赞][赞][赞][爱心][爱心][爱心][爱心][爱心][爱心][爱心][爱心][爱心][爱心][爱心][爱心][爱心][爱心][爱心][爱心][爱心][爱心][爱心][爱心][爱心][爱心]积善之家必有余庆	Neutral	2025-11-27 17:36:29	2	U0042
您好一天做几次呀	Positive	2025-11-26 09:58:44	2	U3706
正能量为你点赞[赞][赞][赞]	Neutral	2025-11-19 20:51:27	2	U3707
谢谢老师指导[赞][赞][赞][赞][赞][赞][赞][赞][赞][赞][爱心][爱心][爱心][爱心][爱心][爱心][爱心][爱心]	Neutral	2025-11-05 20:37:10	2	U0056
明天开始练习	Neutral	2025-11-02 16:56:54	2	U3708
[赞][赞][赞][赞][赞][赞][赞][赞][赞][赞][赞][赞]	Neutral	2025-10-31 08:04:15	2	U3709
	Neutral	2025-10-26 18:16:13	2	U3710
@龙的传人	Neutral	2025-10-23 15:04:16	2	U3711
大哥，是每天早晚练习吗[感谢][感谢][感谢]	Neutral	2025-10-23 04:02:36	2	U3712
我从15.6到4.8，锻炼还是需要坚持的	Neutral	2025-10-19 21:12:39	2	U3713
[感谢][感谢][感谢][感谢][感谢]感谢老师	Neutral	2025-10-19 16:07:05	2	U0051
我今天看到你、今晚就开始炼、艹期待我的结果[赞][赞][赞][赞][赞][赞][赞]	Neutral	2025-10-16 19:39:53	2	U3714
老师一天做几次呀？	Neutral	2025-10-16 15:54:12	2	U3715
一天就一起150次吗！还是重复做	Neutral	2025-10-15 16:13:08	2	U3716
7.5是糖尿病吗？	Neutral	2025-10-15 12:49:39	2	U3717
问一下糖友你吃药吗？	Neutral	2025-10-12 17:32:36	2	U3718
[看]	Neutral	2025-10-11 19:19:57	2	U3719
[流泪]	Neutral	2025-10-11 09:31:33	2	U3720
[赞][赞][赞][玫瑰][玫瑰][玫瑰]	Neutral	2025-10-11 09:30:53	2	U3721
这是好心的主播不骗人。把好方法拿出来分享给大家，不向那些人特为流量骗人。说什么关注后转给你，实际没有任何一个人收到过	Negative	2025-10-08 11:08:07	2	U3722
女儿找了个小她5岁的男朋友，男孩父母离异，刚读完高中，我觉得不靠谱，大哥觉得呢？	Neutral	2025-10-06 13:19:16	2	U3723
[赞][赞][赞][感谢][感谢][感谢]	Neutral	2025-10-04 23:33:21	2	U3724
[赞][赞][赞][玫瑰][玫瑰][玫瑰]	Neutral	2025-10-04 17:02:36	2	U3725
@[玫瑰][玫瑰][玫瑰]	Neutral	2025-10-04 09:24:23	2	U3726
老年人炼不了，漆盖受不了	Neutral	2025-10-03 18:05:55	2	U3727
[赞][赞][赞]	Neutral	2025-10-03 17:38:11	2	U3702
每侧50次怎么理解	Neutral	2025-10-03 16:07:30	2	U3700
唐叔空腹15是不是就没救了	Neutral	2025-10-03 14:44:38	2	U3673
一天做几次[赞][赞][赞]	Neutral	2025-10-02 10:50:53	2	U0004
糖哥 每个动作都是50下么	Neutral	2025-10-02 08:37:26	2	U3699
这三个动作做完好累[捂脸][捂脸]	Positive	2025-09-29 22:45:50	2	U3674
我经常锻炼现在每天空腹5.4左右	Neutral	2025-09-29 20:50:19	2	U0048
[赞]	Neutral	2025-09-25 09:31:18	2	U3675
想知道有没有做出效果	Neutral	2025-09-24 18:35:35	2	U3676
[玫瑰]	Neutral	2025-09-24 16:14:22	2	U3677
唐叔，早上好，谢谢你的分享，传递正能量，为你点赞[赞][赞][赞][赞][赞]	Positive	2025-09-24 06:16:28	2	U3678
这三个动作做了，还要吃药吗	Neutral	2025-09-21 18:08:33	2	U3679
谢谢糖叔[赞][赞][赞][赞][赞][赞]	Neutral	2025-09-21 03:31:01	2	U3680
请问评论区有没有人做的有效果？	Neutral	2025-09-20 13:15:44	2	U3681
有没有炼了一个月的？	Neutral	2025-09-16 13:33:54	2	U3682
[捂脸]一样	Neutral	2025-09-15 10:42:42	2	U3683
我不吃大米早上就只有一碗燕麦片俩水煮蛋	Neutral	2025-09-15 08:19:22	2	U3684
[赞][赞][赞]	Neutral	2025-09-13 04:24:33	2	U3685
真的吗	Neutral	2025-09-09 10:25:16	2	U3686
怎么下单	Neutral	2025-09-07 09:48:41	2	U3687
[赞][赞][赞]	Neutral	2025-09-06 16:23:23	2	U0008
一天要做几次啊[微笑]	Neutral	2025-09-04 23:27:50	2	U3688
一个视频，一个动作，各种不一样，还是算了吧	Neutral	2025-08-30 12:12:19	2	U3689
[比心][比心][比心][感谢][感谢][感谢]	Neutral	2025-08-29 17:00:07	2	U3690
每天什么时间做这运动	Neutral	2025-08-29 08:24:37	2	U3691
看你咋像师从马老师	Neutral	2025-08-28 23:24:28	2	U3692
真的可以降糖吗？	Neutral	2025-08-28 15:39:44	2	U3693
[感谢][感谢][感谢][感谢][感谢][感谢][感谢][感谢][感谢][赞][赞][赞][赞][赞][赞]	Neutral	2025-08-25 14:40:29	2	U3694
我是收藏派 你们是那一派[抠鼻]	Neutral	2025-08-23 21:11:18	2	U3695
这几个动作是有点累！希望有效果！	Neutral	2025-08-23 15:27:25	2	U3696
@	Neutral	2025-08-22 07:31:43	2	U3697
每天要练多久？	Neutral	2025-08-21 20:43:25	2	U0008
	Neutral	2025-08-21 20:01:49	2	U0036
	Neutral	2025-08-21 20:01:45	2	U0036
[赞][赞][赞][赞][赞][赞][赞][赞]	Neutral	2025-08-21 19:54:38	2	U3698
请问你现在吃着西药吗	Neutral	2025-08-21 14:01:57	2	U3728
早上空腹	Neutral	2025-08-21 10:45:34	2	U3701
[赞][赞][赞][赞][赞]	Neutral	2025-08-18 18:26:43	2	U0083
好人[赞][赞]	Positive	2025-08-17 17:37:48	2	U3729
[赞][赞][赞]	Neutral	2025-08-13 23:07:47	2	U3759
🈵🈵正能量[赞][赞][赞]	Neutral	2025-08-09 22:59:00	2	U3761
你们有什么好的方法降血糖？二糖空腹一个月从11多降到9左右了， 吃双瓜加运动下降的	Neutral	2025-08-24 14:40:46	2	U3762
3	Neutral	2025-08-24 12:33:15	2	U3763
空腹5.多 饭后高10.11.12多怎么办？	Neutral	2025-08-23 18:42:38	2	U3764
今天开始练，我看看一个月后能否将下来，目前空腹11	Neutral	2025-08-20 09:36:37	2	U3765
大叔早晚餐后一个小时练，还是半个小时练 ？？	Neutral	2025-08-19 15:15:54	2	U3766
不跑步，练这三个动作就行吗	Neutral	2025-08-09 18:22:32	2	U3767
血糖9.3，明天开始练	Neutral	2025-08-06 22:35:25	2	U0090
6.6	Neutral	2025-08-04 09:26:10	2	U3768
哑铃锻炼也可以降糖的吗？	Neutral	2025-07-28 09:32:00	2	U3769
我今天测7.2.今天开始练，过几天再看	Neutral	2025-07-27 10:27:00	2	U3770
不吃药只运动可以吗	Neutral	2025-07-11 22:11:00	2	U3771
0K	Neutral	2025-07-11 17:24:35	2	U3772
之前空腹1.6[赞]	Neutral	2025-07-07 18:28:38	2	U3773
这3个动作简单[福][福]我应该学的会[平安果][平安果][平安果]	Neutral	2025-07-06 12:22:21	2	U3774
关注为你点赞[赞][赞]	Neutral	2025-07-04 11:44:41	2	U3775
可以辅助gnc抗糖丸用，硫辛酸能帮助抗糖[赞]	Neutral	2025-07-03 09:15:43	2	U3776
[玫瑰][玫瑰][玫瑰]	Neutral	2025-07-01 09:07:11	2	U3777
[赞][赞][赞]	Neutral	2025-06-30 21:44:21	2	U3778
糖分哪里去了？	Neutral	2025-06-27 21:41:21	2	U3779
深蹲我非常认可	Neutral	2025-06-26 16:24:26	2	U3780
[赞][赞][赞]	Neutral	2025-06-26 09:17:59	2	U3781
直接跑步	Neutral	2025-06-25 22:36:25	2	U3782
谢谢老师的分享，值得点赞。	Neutral	2025-06-25 17:44:31	2	U3783
二话没有，直上干货，给你要点赞点赞[赞][赞][赞][赞][赞][鼓掌][鼓掌][鼓掌][鼓掌][赞]	Positive	2025-06-25 12:28:45	2	U3784
一天做几次	Neutral	2025-08-06 22:34:32	2	U0090
记住了	Neutral	2025-06-25 10:20:58	4	U3785
有些人就是懒的做！！！	Neutral	2025-06-23 08:11:45	2	U3760
爽快，不绕弯子，一生幸福。	Neutral	2025-06-22 19:01:44	2	U3758
老弟练这个动作糖尿病的人用不用吃药？[鼓掌][鼓掌][鼓掌][鼓掌][鼓掌][鼓掌]我练了几下就浑身没力气。	Neutral	2025-06-22 11:30:00	2	U3731
[赞][赞][赞][赞]	Neutral	2025-06-22 08:54:09	2	U3757
有[666]	Neutral	2025-06-22 08:18:35	2	U3732
你这个不是4个动作吗，	Neutral	2025-06-21 22:21:04	2	U3733
管用吗谢谢	Neutral	2025-06-21 10:43:10	2	U3734
不管作用大不大，首先给个赞，没有拖泥带水[赞]	Neutral	2025-06-21 03:23:29	2	U3735
每次练多久	Neutral	2025-06-20 20:25:48	2	U3736
[666][666][666][666]	Neutral	2025-06-20 11:43:48	2	U3737
[鼓掌][鼓掌][鼓掌][鼓掌]	Neutral	2025-06-19 14:35:01	2	U3738
管住嘴迈开腿[赞]	Neutral	2025-06-19 09:32:09	2	U3739
全抖音就你最痛快不啰嗦[赞][赞][赞]	Neutral	2025-06-19 08:30:37	2	U3740
[赞][赞][赞][赞][赞][赞][赞]	Neutral	2025-06-18 05:28:02	2	U3741
三高都是吃出来的。只要保证按1970年那个年代的生活水平，自然好了。	Neutral	2025-06-18 01:08:20	2	U3742
早上空腹测量9.1，不吃药行吗朋友们	Neutral	2025-06-16 21:37:29	2	U0098
糖叔，练好了可以吃甜不？[捂脸][捂脸][捂脸]	Positive	2025-06-16 16:32:05	2	U3743
[赞][赞][赞]	Neutral	2025-06-16 08:00:53	2	U3744
[赞][赞][赞]	Neutral	2025-06-15 15:49:14	2	U3745
你好！关注你了。今天刚刚刷到，从今天开始天天练。要不要吃药啊	Positive	2025-06-15 15:09:57	2	U3746
[比心][比心][比心]	Neutral	2025-06-14 10:23:08	2	U3747
我也试试	Neutral	2025-06-14 09:45:54	2	U3748
注意：评论区有想欺骗糖人的钱财，有人私加你，深称也是糖人，经过她表姐推荐的高人医生，她现在恢复非常好，接下来就给你推荐。切记，这是骗子，直接拉黑	Neutral	2025-06-13 20:21:35	2	U0101
谢谢分享[666][666][666][玫瑰][玫瑰][玫瑰]	Neutral	2025-06-13 07:07:56	2	U3749
[赞][赞][赞][赞][赞][赞][赞]	Neutral	2025-06-12 22:12:02	2	U3750
各位糖友空腹12.66是什么概念	Neutral	2025-06-12 17:23:27	2	U3751
蛙鼓	Neutral	2025-06-12 14:53:38	2	U3752
[赞][赞][赞][赞]	Neutral	2025-06-12 11:39:18	2	U3753
[赞][赞][赞][赞][赞][爱心][爱心]	Neutral	2025-06-11 22:33:45	2	U3754
膝盖不得劲，怎么做。[捂脸][捂脸][捂脸]	Neutral	2025-06-11 14:07:52	2	U3755
谢谢，在今天也开始，看结果	Neutral	2025-06-11 06:21:13	2	U3756
我想说，这三个动作你就连着做50个给我们看看吧[呲牙]	Neutral	2025-06-10 18:40:21	2	U3730
老妈会疼，怎么锻炼[捂脸]	Neutral	2025-06-10 16:04:31	1	U3671
谢谢老师分享	Neutral	2025-06-10 10:28:49	2	U3614
[赞][赞][赞][赞][赞][赞]	Neutral	2025-06-10 08:18:47	2	U3670
[赞][赞][赞][赞][赞][赞][赞][赞]	Neutral	2025-06-10 08:15:06	2	U3587
[赞][赞][赞][赞][赞]	Neutral	2025-06-10 07:09:59	2	U3588
你好，一天一组做3次，可以吗？	Positive	2025-06-10 04:59:28	2	U3589
主播那我听你的照你说得试试	Neutral	2025-06-09 13:41:53	2	U0105
前提是适合自己才是真的好[感谢][感谢][感谢][666]	Neutral	2025-06-09 08:58:38	2	U3590
@[赞][赞][赞][赞][赞][赞]	Neutral	2025-06-09 05:35:12	2	U3591
[赞][赞][赞][赞][赞]	Neutral	2025-06-09 04:02:47	2	U3592
我也测试一下	Neutral	2025-06-13 11:09:55	2	U0101
二型15.7到现在5.2了 很知足[流泪][感谢]	Neutral	2025-06-08 11:44:15	2	U3593
什么是体内不能储存的糖原？	Neutral	2025-06-08 08:03:35	2	U3594
谢谢了[赞][赞][赞]	Neutral	2025-06-08 07:58:01	2	U3595
什么时候做最好呢	Neutral	2025-06-07 21:18:02	2	U3596
什么时候练	Neutral	2025-06-07 18:48:32	2	U3597
关注[赞][赞][爱心][爱心][鼓掌][鼓掌]。	Neutral	2025-06-07 12:21:43	2	U0057
有没有坚持练一个月的，反馈一下效果[比心][比心]	Neutral	2025-06-07 09:43:47	2	U3598
谢谢帅哥分享[赞][赞][鼓掌][鼓掌]	Neutral	2025-06-07 00:50:15	2	U3599
[鼓掌][鼓掌][鼓掌]	Neutral	2025-06-07 00:13:53	2	U3600
你能通过这三个动作能逆转吗？？？？？？	Neutral	2025-06-06 20:58:50	2	U3601
[比心][比心][比心][比心]	Neutral	2025-06-06 19:10:58	2	U3602
感谢分享	Neutral	2025-06-06 15:00:52	2	U3603
[赞][赞][赞]	Neutral	2025-06-05 17:52:58	2	U3604
我9.8下个月见	Neutral	2025-06-05 06:04:45	2	U0060
明天开始练起来	Neutral	2025-06-05 00:47:59	2	U3605
主播每天几次，	Neutral	2025-06-06 18:56:23	2	U0105
[赞]	Neutral	2025-06-04 14:22:56	2	U3606
向你学习啊，[赞][赞][赞][赞][赞][感谢][感谢][感谢]	Neutral	2025-06-04 06:01:42	2	U3607
感谢感谢你的分享[爱心][玫瑰][大笑][赞][抱拳]	Neutral	2025-06-04 03:03:13	2	U3608
[赞][赞][赞]	Neutral	2025-06-03 20:47:50	2	U3609
@	Neutral	2025-06-03 16:43:29	2	U3610
这些天不注意，早上6.8，烦人	Neutral	2025-06-03 16:20:04	2	U3611
[赞][赞][赞][赞][赞][赞][赞][赞][赞]	Neutral	2025-06-03 14:36:44	2	U3586
[比心]	Neutral	2025-06-03 09:51:23	2	U3584
每天练多久？饭后练还是早上起床练	Neutral	2025-06-03 07:26:44	2	U3557
忽悠人的吧，你讲的这几个动作，我几乎做得和你说的差不多，但是我的随即血糖依然很高啊[捂脸][捂脸][捂脸][捂脸]	Neutral	2025-06-03 06:59:48	2	U3583
每天餐后练一次吗	Neutral	2025-06-03 02:25:32	2	U3558
[666][666][666][666][赞][赞][赞][赞][赞][赞][赞]	Neutral	2025-06-03 00:40:51	2	U3559
[赞][赞][赞][赞]	Neutral	2025-06-03 00:35:29	2	U3560
一天做几次？	Neutral	2025-06-02 10:29:29	2	U3561
每天饭后走 可以吗 会有作用吗 谢谢[感谢]	Neutral	2025-06-02 08:10:32	2	U3562
[赞][赞][赞][赞]	Neutral	2025-06-02 07:08:53	2	U3563
[赞][赞][赞][赞][赞]	Neutral	2025-06-02 07:00:15	2	U3564
你什么没瘦	Neutral	2025-06-02 00:17:45	2	U3565
@[赞][赞][赞][赞][西瓜][西瓜]	Neutral	2025-06-01 22:52:04	2	U3566
[赞][赞][赞][赞][赞][赞][赞][赞]	Neutral	2025-06-01 20:14:44	2	U3567
[赞][赞][赞]	Neutral	2025-06-01 18:27:20	2	U3568
我劝你一句，我刚开始查出来的时候，空腹16.9，接着住院了，后来出院以后也是很迷茫，感觉一下子被束缚了，觉得人生太没有意思了。那段时间什么也不敢吃，血糖每天测都能测10几次，很烦，甚至吃的很少照样控制不住。后来慢慢过了几个月，首先调整了心态，一定要接受现实，每天锻炼一会，血糖稳定住了，现在什么都吃，只是要控制主食的量，别吃甜的。中国现在有6亿多糖尿病。我个人觉得这个刚开始发现会不好控制，慢慢的过去几个月，就下来了，一定要用药，我用的是中药。不要相信任何偏方！！！一点用不管。	Neutral	2025-05-15 10:53:21	2	U3569
去年确证高血糖，以前我很喜欢甜食 可乐当水喝 但自从高血糖之后 我喝可乐会头晕 恶心，矿泉水和茶喝了一个月，身体还是控制不住想喝甜的 但市面上大多饮料都是一样情况一喝就恶心，后来慢慢发现几种饮料依然爱喝 其中红牛 喝起来一点不难受，然后我发现一个事实 就是带有酸味的糖饮料我能接受，所以看到这个视频我在想 高血糖的身体本身就已经在排斥糖分，而醋酸能压制碳水转换成葡萄糖进入血液，所以身体能接受酸甜的进入，但糖分毕竟还是糖分 虽然血糖不爆，但这样一来控不了糖分摄入 身体依然肥胖。	Negative	2025-08-08 17:44:31	2	U3570
劝各位吃完酸的碳酸饮料等一定要漱口，不就是超级喜欢吃醋，完了不漱口，导致好多好多牙齿根腐蚀出现缺口，补了几颗，还有几颗太小补不了[酷拽]	Positive	2025-07-26 21:30:03	2	U3571
我真的很喜欢吃醋多的我婆婆说我放醋那么多不要前酸死人[尬笑]他说我爱吃特别酸的口味重让我查血糖[微笑]我只是口味重而已他全家口味轻按他们口味做的饭我吃不下压根	Neutral	2025-05-16 22:08:46	2	U0072
原来这就是我逛吃不胖的原因之一，我吃饭优先都是蔬菜，然后肉类，最后碳水，基本最后就是米饭只吃了二三口就饱了，但是容易饿，一天四餐[捂脸]，我不爱吃添加精致的糖，除了不蛮喜欢吃醋，[坏笑]	Neutral	2025-06-10 09:33:36	2	U3572
这以上的所有每一条我都中了，因为我从小就有在控糖巧克力这种甜品什么的根本就不吃，然后这上面所有的行为我都经常有就连我身边的好多人都问啊，你吃火锅你不占麻将的吗？我说我不吃麻将，我一般都是蘸那个酸辣碟习惯了	Positive	2025-07-22 11:28:44	2	U3573
真的全中，我是家里人本来就有瘦的基因，再加上我自己爱吃醋和辣，巨爱吃蔬菜每次还没等吃主食就饱了，所以我长这么大就没胖过，从来不运动，每天夜宵垃圾食品不间断，体重也一直维持在90斤。	Negative	2025-06-07 12:32:08	2	U3574
我家一年吃不了一瓶醋[捂脸]一个月就一瓶酱油，重油重盐重酱油。目前还好50多了检查的还可以，吃油炸耦合一人一盘子？油条油饼麻辣鱼麻辣火锅超级最爱，自助餐，烧烤，也是最爱，生死有命，随他吧！养生专家健身教练，有钱的百亿大佬，有钱的明星，不也有得病没了，顺其自然，生活已经很苦，让自己的胃和嘴就甜一口香一口吧	Positive	2025-06-16 10:36:25	2	U3575
醋只能暂缓消化。让食物消化的慢一点。拉长升糖时间。并不能降低吸收效率。吃不吃醋跟食物的热量没有任何影响。你吃多少还是吸收多少哈，朋友们	Neutral	2025-08-21 15:55:02	2	U3576
原来是这样啊，我们认识的怀孕小姐妹六个，她们均一百二内，我一百八，我爱吃辣，不忌口，她们不吃辣还忌口，结果做糖耐时只有我一个人过了，她们都没过，我就说和胖不胖没关系吧[大笑][大笑][大笑]	Neutral	2025-06-10 01:04:09	2	U3577
好久没吃辣椒了[泪奔]另外先吃菜再吃饭这个反人类啊[泪奔]菜吃光了干噎大米饭多少人吃得下去啊？我就早餐这么吃，因为现在控糖早餐都是什么钢切燕麦，全麦面包。后面两餐只能尽量蔬菜和饭混合吃	Positive	2025-05-18 08:48:05	2	U3578
调料加醋增加风味可以，纯沾醋做不到，辣椒我也挺喜欢吃，但是我肠胃受不了，一吃就容易拉肚子，我都是一口菜一口饭，或者菜饭一起，上班为了赶时间做事，也只能吃快，上次把自己吃进急诊，我自己还是个医院上班的[九转大肠]	Neutral	2025-06-09 05:33:46	2	U3579
我就是 爱吃醋，吃饭就先把菜吃完再吃肉再吃一点点米饭，主食摄入很少，每天精力充沛 气血也足，我很熟但是红细胞都140多	Neutral	2025-05-13 15:38:37	2	U3580
[捂脸][捂脸][捂脸]第一基因问题，第二生存环境，第三，气运，第四生活习惯，这些基本都不可能改变，最有可能改变的就是生活习惯，少吃就行，其他不需要改变	Neutral	2025-05-28 13:16:11	2	U3581
血糖6.1， 去体检医生说找不到比我更健康的了	Neutral	2025-04-28 11:16:41	2	U3582
米饭等凉了再吃，温度也和糖摄入有关。蛋白质、饱和油脂和碳水化合物不要同时摄入。吃肉油要少，有肉有油不要吃主食。	Neutral	2025-06-06 20:38:09	2	U3612
我最近整了一玻璃醋坛子 家里有什么醋就放什么 [捂脸] 当时是为了消耗包菜 蛮好的 酸味也可以 天天吃一盘 现在又放长豆角进去泡 也在想 这样天天吃 人到底能受得了不？	Neutral	2025-06-10 19:00:31	2	U3585
四条里面占两条，爱吃醋，爱吃辣，但吃饭顺序属于是随缘，吃饭速度属于是一流，大口吃饭大口吃肉，嚼嚼就咽[憨笑]	Neutral	2025-08-31 16:56:57	2	U3613
都中了 但是我低血糖	Neutral	2025-06-19 05:17:38	2	U3643
正常吃就是了，只要你是正常一日三餐吃喝不过量摄入日常也不是久坐不动，那就不是你的问题那是基因上的遗传性，基因上的问题又不是人决定的，各种限制不过都是为了制造焦虑好卖药罢了。	Neutral	2025-05-20 00:09:28	2	U3645
我这几年特别爱吃甜食 高热量食物还总喝饮料 一直这样下去怕自己得糖尿病 没想到从小跟我妈学的吃啥东西放醋的习惯 自己从小爱吃辣全中 一边升高一边维持[憨笑]	Neutral	2025-11-10 21:15:11	2	U3646
下一条[疑问]	Neutral	2025-06-10 22:58:38	2	U3647
我超爱吃醋和辣椒，吃火锅都要半碗醋，吃饭还死慢死慢的，人家碗都洗完了我还没吃完，然后前几天查空腹血糖，一次是6.24，一次是6.28，天塌了[流泪][流泪][流泪][流泪]	Neutral	2025-05-26 13:00:44	2	U3648
怪不得我胰岛素抵抗[晕]，我讨厌吃醋更讨厌吃辣，爱吃甜食[笑哭]	Negative	2025-04-30 00:01:55	2	U3649
我就贼喜欢喝醋[泪奔]我们这也很能吃辣，不喝醋的也吃酸汤，所以你看贵州人瘦瘦小小的。只不过现在感觉醋都兑水，难喝死了，不晓得哪里能买到正宗的[九转大肠]	Neutral	2025-06-16 11:19:25	2	U3650
辣辣的食物吃起来就是超级五蚂蚁[抱抱你][抱抱你][抱抱你]	Neutral	2025-07-20 03:15:42	2	U3651
终于找到一个爱吃醋的好处了，小时候老是被家里人说吃啥都得倒点醋还被嫌弃@老实的农村人 [黑脸]很多饭食，不加醋，我真的是咽不下去[捂脸]	Positive	2025-12-11 21:36:54	2	U3652
喝醋吃辣全占了，我就看看我将来咋样	Neutral	2025-11-23 17:33:00	2	U3653
爱吃醋爱吃辣[呲牙][呲牙][呲牙]	Neutral	2025-09-08 23:37:15	2	U3654
我喜欢吃辣 但不喜欢醋	Neutral	2025-09-08 23:22:39	2	U3655
	Neutral	2025-09-03 13:44:47	2	U3656
害怕。。我咋吃主食。。但爱喝咖啡。	Neutral	2025-09-03 11:08:26	2	U3657
不是，你得吃的是真醋才行[捂脸][捂脸]	Neutral	2025-08-25 07:42:45	2	U3658
山西人有胖子嘛	Neutral	2025-08-24 23:25:17	2	U3659
要先吃菜，然后再吃饭	Neutral	2025-08-24 20:36:21	2	U3660
西北都是面食 吃面都要放醋[耶]	Neutral	2025-08-24 17:37:09	2	U3661
@一揽清风明月观 啊？	Neutral	2025-08-24 12:55:31	2	U3662
醋喝多了也不好吧 也含糖	Neutral	2025-08-24 00:31:26	2	U3663
我就是特别喜欢吃醋，如果吃饺子，你可以不给我酱油，但是一定要有醋[捂脸]，我吃包子倒醋，给醋倒的都直淌，我感觉老香了	Neutral	2025-08-23 17:41:32	2	U3664
@鸽子湖 你看三步之内必有解药[黑脸]	Neutral	2025-08-22 23:19:22	2	U3665
说吃饭顺序是傻子的，你先试一段时间再回来说	Neutral	2025-08-22 20:47:23	2	U3666
@YOU 玛雅 怪不得你之前和我说你爱喝醋	Neutral	2025-08-22 16:47:56	2	U3667
最重要的少吃碳水[微笑][微笑][微笑]要不你对瓶吹也没用[微笑][微笑]	Neutral	2025-08-22 15:18:44	2	U3668
如果你真的是医生的话，按照你的工作强度，你死的可能比我早。	Neutral	2025-08-22 11:52:31	3	U3669
菜肉饭？吞到肚子里还不是一堆。	Neutral	2025-08-22 11:08:29	2	U3644
吃面就放很多醋跟辣椒[灵机一动]	Neutral	2025-08-22 11:07:01	2	U3642
难怪我吃不胖，就喜欢辣的和酸的[躺平]	Neutral	2025-08-22 05:22:46	2	U3615
酸辣这一块 那还说啥了 看我IP[憨笑][憨笑]	Neutral	2025-08-22 03:47:29	2	U3641
我每天每餐吃的饭最多，如果有好的菜的话[憨笑][憨笑][憨笑]	Neutral	2025-08-21 20:08:21	2	U3616
这不就是我吗？[捂脸]	Neutral	2025-08-21 13:58:47	2	U3617
苹果醋吗？早上喝点有好吃吗	Positive	2025-08-21 12:04:32	2	U3618
我又爱吃辣椒，又爱吃醋，	Neutral	2025-08-21 07:50:52	2	U3619
为啥我也这样[尬笑]现在糖尿病酮症酸中毒了[微笑]	Neutral	2025-08-21 00:53:58	2	U3620
我吃米饭就爱多嚼几下感觉那样会变甜一点	Neutral	2025-08-21 00:52:04	2	U3621
为什么医生要我不要吃辣	Neutral	2025-08-20 22:31:11	3	U3622
我是胰岛素抵抗，29岁。搞得我大姨妈非常不正常现在，但是卵巢功能指数查了2.47	Neutral	2025-08-20 10:52:41	2	U3623
以前天天吃辣，测血糖很正常，但是最近2个月没吃辣一测血糖13点多[流泪]	Neutral	2025-08-20 08:09:22	2	U3624
报告，我以后要跟医生怎么吃我就怎么吃[害羞][比心]	Neutral	2025-08-20 01:02:44	2	U3625
@22222222	Neutral	2025-08-19 23:04:27	2	U3626
人家吃菜爱沾酱油 我爱沾醋，爱吃辣 超级不爱喝饮料，但是爱吃红烧肉。	Neutral	2025-08-19 20:06:05	2	U3627
都不[抱抱你]我完了	Neutral	2025-08-19 19:40:42	2	U3628
我爱吃酸辣粉算不算减肥	Neutral	2025-08-19 18:47:46	2	U3629
喝醋真能降血糖吗	Neutral	2025-08-19 17:20:45	2	U3630
@丞相 我服了 怪不得你喝那么多饮料 甜品 血糖还不高	Neutral	2025-08-19 12:25:06	2	U3631
我超爱吃醋和辣，不喜欢重盐重油@大萌 [看]	Neutral	2025-08-19 10:24:15	2	U3632
[666][666][666]	Neutral	2025-08-19 10:06:44	2	U3633
@林小鱼ツ 我就这样吃的诶	Neutral	2025-08-18 13:36:20	2	U3634
我只能说 一顿吃陶瓷碗小半碗，吃菜多吃肉多， 饿了没到饭点就忍忍，少喝奶茶和甜品	Neutral	2025-08-18 11:39:45	2	U3635
我有些时候就是特别想吃辣然后饭量也变低过一两个星期就又恢复之前的状态该吃吃该喝喝，这是不是身体的自我调节	Neutral	2025-08-18 06:45:08	2	U3636
@⁺✞ʚ狂风吹裤裆ɞ✟₊ 爱吃醋不爱吃辣[憨笑][憨笑][憨笑]	Neutral	2025-08-18 06:01:01	2	U3637
这么说云贵川这种爱吃辣的地方得糖尿病的是不是比其它地方更少一点	Neutral	2025-08-18 01:00:17	2	U3638
原来我的习惯还可以，我BMI32，空腹血糖5.2[捂脸]	Neutral	2025-08-17 15:30:10	2	U3639
@眠 @面包师傅的铲屎官 @咩咩 三步之内必有解药，可惜我讨厌醋[流泪]	Negative	2025-08-17 13:24:00	2	U3640
那我醋也吃辣也吃糖也吃呢，尤其喜欢甜辣一起	Neutral	2025-08-17 08:57:08	2	U3338
醋，辣，菜肉饭，小口吃，多嚼	Neutral	2025-08-17 00:16:51	2	U3322
老年人，清晨11多血糖，这个有用不	Neutral	2025-08-16 23:06:32	2	U2873
我也爱吃辣	Neutral	2025-08-16 16:03:18	2	U3321
@六元一只虾 下班买瓶醋回去炫	Neutral	2025-08-16 14:58:08	2	U3006
以前不爱吃醋，上大学开始爱吃醋了	Neutral	2025-08-16 13:17:43	2	U3007
@琪琪怪怪. [憨笑][憨笑]看到爱吃辣我就知道我没啥事	Neutral	2025-08-16 10:05:59	2	U3008
@烛幽 辛好我爱吃辣[抱抱你]	Positive	2025-08-16 06:39:43	2	U3009
@枂煷 快来学[流泪][流泪][流泪]我害怕[流泪]	Neutral	2025-08-16 00:39:30	2	U3010
山西人有福了，顿顿吃醋	Neutral	2025-08-15 23:43:55	2	U3011
@喜欢丑的ㅤㅤ 不好意思[绿帽子]	Neutral	2025-08-15 10:29:36	2	U0032
啥意思，看不明白	Neutral	2025-08-15 06:43:29	2	U3012
我超级爱喝醋，而且无辣不欢，还喜欢吃素。并且吃饭到从小到大都很慢，嚼半天[捂脸]	Neutral	2025-08-14 18:48:39	2	U3013
幸好我爱吃辣[看]吃酸的算不算[看]	Positive	2025-08-14 15:53:44	2	U3014
我爱吃醋，爱吃辣椒，吃鸡蛋会蘸辣椒面[捂脸][捂脸][捂脸]	Neutral	2025-08-14 09:09:01	2	U3015
太好了，我非常爱吃辣[抱抱你][抱抱你][抱抱你]	Neutral	2025-08-13 22:41:00	2	U3016
我都是一口饭里有菜，有口饭里有肉，除了小孩，谁吃饭一样一样吃啊[发呆]	Neutral	2025-08-13 19:00:06	2	U3017
我完全是反着来的[捂脸]	Neutral	2025-08-13 16:40:08	2	U3018
谁跟一样吃饭必须喝水 吃点饭菜必须喝点水在吃在喝	Neutral	2025-08-13 13:15:45	2	U3019
@能否重写爱意 多吃醋，辣椒，吃饭按顺序	Neutral	2025-08-13 00:20:38	2	U3020
@德州烤肉狂 我之前吃啥带汤的都放醋，但是我发现这两年不是非放不可了，然后就长胖了	Neutral	2025-08-12 23:08:13	2	U3021
吧唧嘴	Neutral	2025-08-12 19:01:03	2	U3022
@一块饼干 原来我天天控糖[泪奔][泪奔][泪奔]	Neutral	2025-08-12 17:14:42	2	U3023
@大便小猫 @empty @年 全占了[看]	Neutral	2025-08-12 15:03:00	2	U3024
山西还是很权威的	Neutral	2025-08-12 12:36:29	2	U3025
无辣不欢，潜意识防止了糖尿病	Neutral	2025-08-12 02:38:37	2	U3026
我基本上炒菜都是吃醋[捂脸]	Neutral	2025-08-12 01:12:18	2	U3027
上桌不看肉，就乐意吃点青菜🥬[捂脸][OK]	Neutral	2025-08-11 23:34:25	2	U3028
我只Business 400	Neutral	2025-08-11 13:48:02	2	U3029
山西人解释一下你们亲戚朋友有糖尿病没？	Neutral	2025-08-11 11:17:14	2	U3030
@-Z- 这不就是你吗[发呆]	Neutral	2025-08-11 08:55:57	2	U3005
没别的，就是爱吃辣[看]	Neutral	2025-08-10 20:38:13	2	U3003
@杨阳羊医生 这是真的吗，求解答	Neutral	2025-08-10 17:57:35	3	U2976
@Blacklist. 多吃辣	Neutral	2025-08-10 17:16:09	2	U3002
@“🌈📷久昀i 我[九转大肠]	Neutral	2025-08-10 17:07:06	2	U2977
有什么好喝的香醋嘛[看]看山西那边的醋很好[色]	Positive	2025-08-10 14:01:01	2	U2978
@1⁰ @牛角包 @蛋卷 @二百四十七天🦋🎧 @Hickey. 咱们喜欢吃火鸡面的和爱吃醋的有救了[黑脸][玫瑰][流泪]	Neutral	2025-08-09 22:39:20	2	U2979
但是醋里还有加糖[机智]，买哪种醋好	Neutral	2025-08-09 13:15:23	2	U2980
那没事了我们这辣椒当饭吃[憨笑]	Neutral	2025-08-02 14:08:02	2	U2981
@低忧 [微笑袋鼠][微笑袋鼠][微笑袋鼠]	Neutral	2025-07-29 19:35:01	2	U2982
@3.3 我爱吃辣，我不怕了	Neutral	2025-07-24 02:08:16	2	U2983
坏了，现在甲亢吃不了辣，有点难受[抱抱你]我还是挺爱吃辣的[抱抱你]	Neutral	2025-07-23 23:42:23	2	U2984
难怪山西人不得糖尿病原来食醋降血糖的	Neutral	2025-07-23 18:24:57	2	U2985
但是糖尿病人大部分是中老年人啊，你让老人多吃辣……[微笑]	Neutral	2025-07-23 13:45:45	2	U2986
这些我全中 但我低血糖[捂脸]	Neutral	2025-07-22 12:08:43	2	U2987
我每次吃东西都要把他嚼十几遍，嚼的很烂，不然咽不下去[捂脸]	Neutral	2025-07-21 14:21:38	2	U2988
我有段时间就是疯狂爱吃醋	Neutral	2025-07-20 14:14:54	2	U2989
这些我全中 但我低血糖[捂脸]	Neutral	2025-07-20 09:58:39	2	U2990
快快快，哪款醋最好吃推荐一下[尬笑]求求了	Positive	2025-07-20 00:56:26	2	U2991
为什么我老爱吃醋了还是胖[困][困][困][困]吃鸡蛋都要加醋[困]	Neutral	2025-07-18 18:21:49	2	U2992
辣椒醋[笑哭]蘸着吃	Neutral	2025-07-17 09:57:20	2	U2993
我特别爱吃醋为什么我不瘦	Neutral	2025-07-16 17:58:38	2	U2994
懂了 謝謝醫生	Neutral	2025-07-16 02:20:17	2	U2995
我爱吃醋爱吃辣，猜到也是先吃素菜再吃荤菜，一点也没影响我高血脂[泪奔]	Neutral	2025-07-14 22:15:19	2	U2996
难怪山西人最爱吃醋[捂脸]	Neutral	2025-07-12 20:29:33	2	U2997
都中，血糖一样高[捂脸]	Neutral	2025-07-12 12:31:07	2	U2998
不是……第三个不应该一个一口，混在一起吃吗[蜜蜂狗]	Neutral	2025-07-11 08:33:59	2	U2999
我全有血糖还是6.5	Neutral	2025-07-10 18:59:28	2	U3000
只要保持正常的体力活动，吃啥不过量，都没问题	Neutral	2025-07-10 07:30:12	2	U3001
家里醋多的成箱往外送，但我不爱酸味，所以我血糖高	Neutral	2025-07-08 17:41:51	2	U3031
你都给我看饿了[九转大肠]	Neutral	2025-08-05 16:09:46	2	U3004
顺序？我都是一通扒拉[尬笑]	Neutral	2025-07-30 14:35:54	2	U3032
除了第3条全中[捂脸]	Neutral	2025-07-23 17:33:02	2	U3062
那多嚼两口就累了，不想吃了算什么[暗中观察]	Neutral	2025-07-20 21:20:48	2	U0069
其他我都可以接受我接受不了一口那么多遍[尬笑]	Neutral	2025-07-18 23:27:50	2	U3064
吃完饭1h，刚喝完蜜雪的蜜桃四季，我爸给我测了下血糖9.9，有没有问题啊，怕自己得糖尿病[石化]平常每餐几乎得配饮料，隔几天喝一次奶茶，喜欢吃炸鸡，鸡排	Neutral	2025-07-17 20:43:16	2	U3065
@左川流溪 我也爱吃''醋''为什么我不瘦[发怒]	Neutral	2025-07-15 19:20:46	2	U3066
可是我吃醋要加糖[捂脸]	Neutral	2025-07-08 13:18:32	2	U3067
除了不爱吃辣，其他都有，但是还是胖啊[泪奔]	Neutral	2025-07-08 00:25:39	2	U3068
我都是这么吃饭的	Neutral	2025-07-06 03:19:57	2	U3069
@别碰小熊 @青糕大王👑 这就是ylx	Neutral	2025-07-06 02:11:57	2	U3070
筠连水粉[看]又酸又辣还没什么油，关键是好吃，还配青菜	Positive	2025-07-05 16:54:18	2	U3071
怪不得良子库库吃醋[赞]	Neutral	2025-07-05 11:25:17	2	U3072
我就超爱吃醋和辣椒	Neutral	2025-07-04 08:30:00	2	U3073
我觉得应该先把菜吃掉一大半，再吃掉一大半肉，最后留一点点就米饭，不然干扒米饭谁受得了[捂脸]	Neutral	2025-07-01 21:30:09	2	U0065
我是醋+辣椒+大蒜	Neutral	2025-06-30 06:37:33	2	U3074
@请叫我萱少！ gogogo	Neutral	2025-06-30 01:19:10	2	U3075
细嚼慢咽的含金量来了	Neutral	2025-06-28 18:25:54	2	U3076
你说的先吃菜那个太反人类了，不会真的有人把所有的菜都吃完了才去吃米饭吧，没事吧？大家不应该是吃一口菜，然后再吃一口米饭，然后再吃一口肉，再吃一口米饭吗？	Neutral	2025-06-27 13:35:57	2	U3077
不是我只是单纯喜欢吃酸的辣的，喜欢吃菜不喜欢肉和饭[黑脸]	Neutral	2025-06-27 08:50:58	2	U3078
难怪我之前怎么吃都不胖，原来饮食习惯的原因，我总是先吃菜然后吃肉，最后的饭吃两口就倒掉了	Neutral	2025-06-24 23:26:39	2	U3079
9点多空腹别人给测的指尖血7.9. 转身去医院10点多抽的静脉血5.0。麻烦问一下有可能这么波动么？还是指尖血测得不准？	Neutral	2025-06-24 07:32:32	2	U3080
[赞]	Neutral	2025-06-23 23:27:27	2	U3081
醋加辣椒蘸饺子真好吃	Positive	2025-06-22 14:09:06	2	U3082
我怀孕的时候，特别喜欢吃酸，基本天天2次醋，下好多	Positive	2025-06-22 01:59:28	2	U3083
我就吃视频里这个饭最后十二指肠溃疡了[捂脸]，劝各位吃不好消化的东西掂量掂量自己的胃允不允许	Neutral	2025-06-21 20:03:23	2	U3084
除了吃的快，其他不就全中了吗，从小就喜欢吃醋和辣，讨厌油重盐重，从小也是先吃菜，最后吃白饭，所以对于我来说没有下饭菜，如果一道菜很下饭，那就意味着重油重盐，就嫌弃了[抠鼻]	Negative	2025-06-21 13:50:51	2	U0088
再难吃的饭，我只要放了辣椒和醋，就吃的下去[呲牙]	Neutral	2025-06-21 06:20:22	2	U3085
	Neutral	2025-06-20 14:00:45	2	U0081
我都爱吃怎么还胰岛素抵抗呢[泪奔]	Neutral	2025-06-19 21:14:57	2	U3086
@姣 @超级无敌美丽暴躁母蟑螂 @Lucky（写字版） 我特别喜欢醋 喜欢吃青菜 现在也喜欢辣椒 但是吃不了太辣	Neutral	2025-06-19 14:30:33	2	U3087
我前段时间就特别爱吃辣，糖也高[尬笑]	Neutral	2025-06-19 12:11:02	2	U3088
酸辣粉可以吗[不失礼貌的微笑]	Neutral	2025-06-19 09:08:54	2	U3063
自己住五年了快 一瓶醋都没买过 而且我们全家都没人吃辣	Neutral	2025-06-18 23:02:04	2	U3061
我爱吃酸辣粉（还总是备注：吃不完请给我多菜少粉）[尬笑]怪不得我也不算胖	Neutral	2025-07-01 21:27:08	2	U0065
严重的误导，五味要均衡，不要就喜好一个味，均衡还要清淡，似有若无的感觉最佳，重口怎么办，强制清淡一个月也就习惯了，这是内经的养生法则[感谢]	Positive	2025-06-18 22:59:51	2	U3034
原来是这样啊，我就说我爱吃甜食但是糖耐都过了	Neutral	2025-06-18 22:18:20	2	U3060
666 怪不得我吃麻辣烫饭后不高	Neutral	2025-06-18 20:28:42	2	U3035
但是我的体检报告上明确说了不能吃醋，是为什么	Neutral	2025-06-18 19:20:00	2	U3036
我！就！说！我！每！天！吃！肉！饭！量！也！不！小！怎！么！长！不！胖！！！	Neutral	2025-06-18 19:02:56	2	U3037
爱吃醋，爱吃辣，不爱吃饭（碳水），爱吃肉，赢麻了	Neutral	2025-06-18 18:21:40	2	U3038
讨厌吃醋[听歌]爱吃辣[色]胃不好[吐血]	Negative	2025-06-18 18:11:10	2	U3039
以后吃火锅只吃醋辣蘸料 先涮菜，再涮肉，再吃炒饭 捞出来放凉再吃，多嚼几口	Neutral	2025-06-18 18:00:24	2	U3040
爱吃醋，非常不喜欢吃甜食的有同好吗	Neutral	2025-06-18 17:49:50	2	U3041
[看]@香菜多加点这是什么教程[闭嘴]	Neutral	2025-06-18 17:22:53	2	U3042
讲道理.中文文献看看得了	Neutral	2025-06-18 17:19:23	2	U3043
这不就是螺蛳粉吗，妥妥的减脂餐啊	Neutral	2025-06-18 16:28:28	2	U3044
所以酸辣粉是减脂餐啊	Neutral	2025-06-18 16:15:51	2	U3045
好医生我全点亮[赞][赞][赞][赞][赞]	Neutral	2025-06-09 11:17:56	3	U3046
最健康的自律是运动，最能改变气色的自律是早睡，最能提升气质的自律是读书，最有底气的自律是经济独立，最顶级的自律是攒钱，你有多自律，你就会有多自由。女人这一生有三件事绝对不能停，赚钱变美，爱自己，当你身材好，气质好，经常读书有学识，经济独立又不差钱的时候，你就会发现，哪有时间揣摩别人。哪有时间患得患失，哪有时间留恋过往。你的时间都应该用来提升自己，加油，你是最棒的。	Neutral	2025-06-09 20:26:46	2	U3047
最近觉得手脚经常发麻，感觉不对劲，一测血糖14.多，吓的我立马不敢吃饭了[流泪]一天只吃一顿饭，主食也不吃了，晚饭饿死了也不敢吃，三天了才降到11点多，降不下去，我还胖，准备戒掉早晚饭，顺带减肥，不知道能不能降下来	Neutral	2025-11-22 03:52:43	2	U3048
血糖高不能吃主食，胃糜烂又得吃好消化的，腿骨折后遗症脚脖不能打弯疼，脚后跟疼，两个膝盖疼，别说运动了路都不能多走，我这样的怎么办啊[泣不成声]	Neutral	2025-11-17 16:36:19	1	U3049
[赞][赞][赞][赞][赞]	Neutral	2025-06-18 21:09:25	2	U3050
消渴症~	Neutral	2025-06-11 07:19:27	2	U3051
风医生	Neutral	2025-06-14 12:59:33	3	U3052
@[爱心][爱心][666][666]	Neutral	2025-06-13 16:51:30	2	U3053
虽然金银花都撒我脸上了，但喜欢这大夫[鼓掌]	Neutral	2025-11-27 08:00:42	2	U3054
喝，我喝，你别激动！	Neutral	2025-06-12 14:59:05	2	U3055
加油 从17点多稳定5点多[玫瑰][玫瑰]	Neutral	2025-06-10 15:07:09	2	U3056
我相信这位医师的嘴巴	Neutral	2025-07-06 22:51:16	2	U3057
医生要不你先看看有没有狂躁症吧[不失礼貌的微笑]	Neutral	2025-08-18 04:56:58	2	U3058
为什么我口渴尿多，然后也不饿一天不吃也不饿[流泪]但是一吃就涨血糖	Neutral	2025-12-06 19:06:38	2	U3059
这医生为啥这么瘦？原来是每天不消停，说个话肢体动作还这么多[尬笑][捂脸]	Neutral	2025-10-08 15:34:04	2	U3033
需要	Neutral	2025-11-25 11:59:20	2	U2975
那么简单被你解决了的话就发财了…诺贝尔奖都可以拿。	Neutral	2025-06-12 23:30:29	2	U2974
买了，内裤质量特别好，商家亲自上门安装，服务实在太好了，用着舒适，穿着得体，入口即化，洗的时候不刺激，孩子特别喜欢吃，老人也会用，很宽松一点也不起球，洗的也特别干净，孩子们都特别喜欢吃，版型很好，尺码标准，不沾杯持妆久，洗完也很柔顺头发也不油了，敏感肌用起来毫无压力，握感舒适不伤牙龈，每次炒菜都会放几滴，质量非常好，与卖家描述一致内裤质量非常好，实在太好用了，用着舒适，穿着得体，入口即化，洗的时候不粘锅，孩子特别喜欢吃，老人也会用，一点也不起毛，洗得特别干净，孩子们都喜欢吃，版型很好，尺码标准，不沾杯持妆久，洗完头发也不油了，敏感肌用起来毫无压力，握感舒适，不伤牙龈，每次炒菜都会放几条，质量非常好，跟卖家说法一致	Positive	2025-06-09 15:02:22	2	U2973
我餐前6.28餐后二小时7.85，瑟瑟发抖[流泪][流泪][流泪]	Neutral	2025-12-06 23:50:08	2	U2890
[赞][赞][赞][赞][赞][赞][赞][赞][赞][赞][玫瑰][玫瑰][玫瑰][玫瑰][玫瑰][玫瑰][玫瑰][玫瑰][玫瑰][玫瑰][爱心][爱心][爱心][爱心][爱心][爱心][爱心][感谢][感谢][感谢][感谢]	Neutral	2025-12-04 09:12:58	2	U2891
不是声大就是有理的，你这动静就很吓人，哪怕你说的都对，我都有点不敢信[捂脸]	Neutral	2025-06-14 23:52:46	2	U2892
但是我这位医生同志得了狂躁病了[捂脸][捂脸]	Neutral	2025-06-11 13:35:53	3	U2893
记住主播说的西医上无法根治！但中医可没说过	Neutral	2025-08-29 13:22:05	4	U2894
能不能不要误导网友了，大家有病去正规公立三甲医院进行治疗，不要在网上相信一些无良医生开的方子[捂脸]	Neutral	2025-08-31 10:22:26	2	U2895
你老祖宗都不知道什么时候糖尿病	Neutral	2025-10-31 01:41:34	2	U2896
一直都是直接了当，从不拖泥带水，不知道管不管用，致敬你的勇敢和真诚[赞][赞][赞]	Neutral	2025-06-10 09:10:20	2	U2897
张牙舞爪的江湖术士	Neutral	2025-06-12 08:01:04	2	U2898
我觉得你比糖尿病吓人！[捂脸]	Neutral	2025-06-11 11:28:17	2	U2899
我觉得作为专业人士这样笼统的指导是不负责任的。因为普通人并不能辨别。	Neutral	2025-06-10 01:37:07	2	U2900
	Neutral	2025-12-04 22:15:40	2	U0097
空腹7，饭后10，现在治疗中	Neutral	2025-11-26 19:02:52	2	U2901
医生，我就是跟你说的这样。今天早上量了血压7.2。	Neutral	2025-11-25 08:54:55	2	U2902
	Neutral	2025-11-24 23:48:10	2	U2903
还好我没得	Positive	2025-11-24 22:56:52	2	U2904
老祖宗有听说过糖尿病这个病吗？	Neutral	2025-11-23 16:23:49	2	U2905
好人一生平安	Positive	2025-11-23 16:15:27	2	U0095
[爱心][爱心][爱心][爱心][爱心][爱心][爱心][抱拳][抱拳][抱拳][抱拳][抱拳][抱拳][抱拳][抱拳][抱拳][玫瑰][玫瑰][玫瑰][玫瑰][玫瑰][玫瑰][玫瑰][玫瑰][玫瑰][玫瑰][玫瑰]	Neutral	2025-11-23 16:15:00	2	U0095
[赞][赞][赞][赞][赞][赞]	Neutral	2025-11-22 21:05:40	2	U2906
需要	Neutral	2025-11-21 08:57:23	2	U2907
慢点，谁追你呢	Neutral	2025-11-20 19:08:41	2	U2908
我用不用把胰岛素停了	Neutral	2025-11-20 17:22:39	2	U2909
空腹14.5	Neutral	2025-11-20 12:49:34	2	U2910
说的简单	Neutral	2025-11-20 10:21:12	2	U2911
好用力，真的可以就好	Neutral	2025-11-19 16:19:49	2	U2912
幼儿能喝吗	Neutral	2025-11-19 14:25:48	2	U2913
一天喝一次吗？还是。	Neutral	2025-11-18 10:33:23	2	U2914
我20岁空腹5.9[流泪]	Neutral	2025-11-17 14:43:19	2	U2889
我不口渴就是吃得多还瘦了	Neutral	2025-11-15 23:00:09	2	U2888
爬13上打瞌睡去吧	Neutral	2025-11-14 13:48:42	2	U2887
[赞]	Neutral	2025-11-14 12:19:15	2	U2886
	Neutral	2025-11-13 20:36:16	2	U2860
[心][心][心][心][祈祷][祈祷][祈祷][祈祷][祈祷][赞][赞][赞][赞][赞]	Neutral	2025-11-13 09:45:35	2	U2861
好像跳大神的	Positive	2025-11-12 20:12:34	2	U2862
一起煮水喝，需要忌口吗[呲牙]	Neutral	2025-11-11 22:45:20	2	U2863
听你说的这话就没啥真本事，终于是根据每个人的体质来治疗的，不是每个人开的药都是一样的，	Neutral	2025-11-11 13:04:48	2	U2864
三期也可以用这种可以吗？	Neutral	2025-11-11 06:27:42	2	U2865
[玫瑰][玫瑰][玫瑰][玫瑰]	Neutral	2025-11-10 11:09:09	2	U2866
谁用过有用吗	Neutral	2025-11-09 22:38:20	2	U2867
[泣不成声]	Neutral	2025-11-09 22:13:58	2	U2868
	Neutral	2025-11-09 15:16:19	2	U2869
儿童一型可以吗	Neutral	2025-11-07 16:07:15	2	U2870
谢谢你，医生。	Neutral	2025-11-07 10:00:26	3	U2871
饭后8.2，算高？	Neutral	2025-11-06 13:00:42	2	U2859
[赞][赞][赞][赞][比心][比心][比心][比心]	Neutral	2025-11-05 19:44:01	2	U2872
一型糖尿病呢	Neutral	2025-11-05 18:47:17	2	U2874
空腹10 口渴， 不瘦，不饿，吃的不多，正常吃8-10 控制饮食10-17 怎么回事[微笑]	Neutral	2025-11-05 17:45:40	2	U2875
@佳Wink 妈呀	Neutral	2025-11-05 09:14:11	2	U2876
[赞][赞][赞]	Neutral	2025-11-05 08:31:56	2	U0009
医生您太神气了[赞][赞][赞][赞][赞][赞][赞][赞][感谢][感谢][感谢][感谢][感谢][感谢][感谢][感谢][感谢][感谢][感谢][爱心][爱心][爱心][爱心][爱心][爱心][爱心]	Neutral	2025-11-04 20:31:28	3	U2877
再也不相信中医，血糖20多都看不出来，还说我肾虚	Neutral	2025-11-04 09:33:41	2	U2878
我血糖老是高，要么就飙到20多，要么就是低的要命	Neutral	2025-11-03 19:31:13	2	U2879
可是我不瘦啊，很胖，特别是肚子越来越大	Neutral	2025-11-02 21:00:32	2	U2880
怎么知道是阴虚火旺	Neutral	2025-11-02 17:23:22	2	U2881
张牙舞瓜	Neutral	2025-11-02 04:06:11	2	U2882
@。	Neutral	2025-11-01 10:31:59	2	U2883
你说的症状我一样都没有，空腹6.26	Neutral	2025-11-01 00:44:17	2	U2884
[赞][赞][赞]	Neutral	2025-10-31 22:31:03	2	U2885
需要	Neutral	2025-10-31 20:30:00	2	U2915
需要	Neutral	2025-10-31 13:41:51	2	U2916
	Neutral	2025-10-31 11:01:45	2	U2917
能喝酒吗？	Neutral	2025-10-30 23:06:03	2	U2946
医生！我今天早上量的血糖，8.0，我下午晚饭前量了一下，又5.0	Neutral	2025-10-30 18:11:09	3	U2948
不好控制呀	Neutral	2025-10-30 15:41:02	2	U2949
手舞之足蹈之[捂脸]	Neutral	2025-10-30 14:55:25	2	U2950
[赞]	Neutral	2025-10-29 13:41:21	2	U0009
需要	Neutral	2025-10-29 10:15:24	2	U2951
几味药简单	Neutral	2025-10-28 23:45:33	2	U2952
这老头怎么这么有劲	Neutral	2025-10-28 12:35:41	2	U2953
能天天喝吗	Neutral	2025-10-28 12:34:57	2	U2954
[赞][赞][赞][赞][赞][赞][赞][赞][赞]	Neutral	2025-10-28 05:02:39	2	U2955
	Neutral	2025-10-28 00:20:59	2	U2956
真的管用么	Neutral	2025-10-27 19:58:25	2	U2957
我的妈呀，这个医生太激动了，血压会飙升[捂脸]	Neutral	2025-10-27 08:22:00	3	U2958
医生说的我试过，真的有效果 只是坚持不下来	Neutral	2025-10-26 19:38:14	3	U2959
有没有办法[玫瑰][666]	Neutral	2025-10-26 09:18:40	2	U2960
@	Neutral	2025-10-26 05:42:07	2	U2961
我谢谢你	Neutral	2025-10-24 21:15:16	2	U0010
二型14.7到现在5.1了 很知足[流泪][感谢][感谢][感谢][感谢]	Neutral	2025-10-24 10:43:32	2	U0030
请问医生，买那一种菊花?	Neutral	2025-10-22 11:49:43	3	U2962
体寒的不能喝这三味药吧	Neutral	2025-10-22 11:42:35	2	U2963
[赞][赞][赞]	Neutral	2025-10-21 19:07:01	2	U2964
胃受不了[捂脸]	Neutral	2025-10-21 16:26:27	2	U2965
我觉得我吃的多，胖，血糖高[捂脸]一点优势都不占啊	Neutral	2025-10-21 09:57:43	2	U2966
我试试，不管用找你算账	Neutral	2025-10-20 14:38:50	2	U2967
空腹6.22是不是糖尿病?	Neutral	2025-10-19 21:16:54	2	U2968
餐后血糖正常，空腹7.7	Neutral	2025-10-18 20:27:19	2	U2969
5.8高吗	Neutral	2025-10-17 17:24:48	2	U2970
今天空腹5.7感觉不敢吃了。虽然在正常范围内，但是不到40岁有点高啊。	Neutral	2025-10-17 08:33:49	2	U2971
给农村人看的吗？	Neutral	2025-10-15 20:04:52	2	U2972
什么样的菊花	Neutral	2025-10-13 22:49:49	2	U2947
六味地黃丸[捂脸]	Neutral	2025-10-13 21:19:21	2	U2945
你和我一样 不过现在我还有160斤 血糖10.1 今天引发高烧到39.3度 想死的心都有了 你降下来以后饮食还控制没有？	Neutral	2025-10-13 16:07:47	2	U2918
[赞][赞][赞][赞][赞][赞][赞]	Neutral	2025-10-12 19:20:42	2	U2944
我从来不渴也不饿。 就是肚子大，越吃越胖	Neutral	2025-10-12 19:09:10	2	U2919
先生大义[比心][比心][比心]	Neutral	2025-10-11 23:06:17	2	U2920
哪有那么简单，每个人体质不一样，中医要辩证的	Neutral	2025-10-11 12:45:08	2	U2921
15.5是不是很严重？空腹	Neutral	2025-10-11 07:55:58	2	U2922
不吓人它咬脚腿	Neutral	2025-10-27 17:46:52	2	U2923
这动作真恶心	Negative	2025-10-16 00:07:29	2	U2924
老祖宗时代哪有什么西洋参？我怀疑你是想给西洋参做宣传！	Neutral	2025-10-15 23:15:20	2	U2925
不用张牙舞爪的说啊	Neutral	2025-10-15 06:08:39	2	U2926
停药三个月了，没什么反应，反而胖了好几斤，只要米饭少吃，饮料少喝	Positive	2025-10-14 09:07:48	2	U2927
要是真的会被西方人学会的	Neutral	2025-10-12 21:55:48	2	U2928
他就是走带货路线	Neutral	2025-10-10 15:30:14	2	U2929
哈哈哈，要不是穿着白大褂，这夸张的表演就挺吓人的	Neutral	2025-10-10 14:16:06	2	U2930
你太吓人了	Neutral	2025-10-10 08:24:32	2	U2931
还是跟不规律的作息时间有关系，熬夜是最最主要的	Neutral	2025-10-09 18:24:11	2	U2932
现在科技这么发达，谁能知道未来咋样，说不定哪天就攻克了呗，不是说艾滋都有特效药了么[抠鼻]	Neutral	2025-10-09 00:46:41	2	U2933
我是血糖高，眼花。也没用性工能了。我崩溃了	Neutral	2025-10-08 19:14:18	2	U0117
谢谢大夫 我一会就去喝2升可乐	Neutral	2025-10-08 09:21:28	2	U2934
我血糖也高血脂抽，阿卡波糖片二甲双胍也吃着呢，我血糖空腹6”5饭后8,5就是管不住嘴	Neutral	2025-10-07 20:09:58	2	U2935
都是抄别人的	Neutral	2025-10-05 22:31:09	2	U2936
我母亲二型糖尿病四十年了，今年82岁六月初五去世的，她平常初了不断药，也不怎么忌口。	Neutral	2025-10-05 22:02:37	2	U2937
	Neutral	2025-10-05 16:25:17	2	U2938
我血糖6.7算高吗	Neutral	2025-10-04 22:48:06	2	U2939
我好像就是阴虚火旺的！没有三多一少的症状！	Positive	2025-10-04 21:07:23	2	U2940
那如果血糖正常呢，还需要吃吗？并发症多	Neutral	2025-10-04 00:03:20	2	U2941
[赞][赞][赞]	Neutral	2025-10-02 16:07:48	2	U2942
是李时珍的吃屎吗	Neutral	2025-10-02 00:03:20	2	U2943
[捂脸]	Neutral	2025-10-01 19:11:18	2	U3089
逻辑错了，应该先吃药或打胰岛素把血糖降下来再来谈调理。主次要分清。	Neutral	2025-09-30 21:18:15	2	U3090
糖尿病的人到底是瘦还是胖	Neutral	2025-09-30 19:44:37	2	U3091
这些症状我都没有，为什么糖了[捂脸]	Neutral	2025-09-30 15:51:14	2	U3207
说就说，你嗷嘞啥[捂脸][捂脸][捂脸]	Neutral	2025-09-30 13:11:14	2	U3238
[鼓掌][鼓掌][鼓掌][鼓掌]管用吗	Neutral	2025-09-30 11:44:39	2	U3239
还是老祖宗厉害[呲牙]	Neutral	2025-09-28 21:11:12	2	U3240
今年41血糖高好几年了	Positive	2025-09-28 04:06:03	2	U3241
[赞][比心][比心]	Neutral	2025-09-26 12:50:49	2	U3242
太苦了	Neutral	2025-09-25 23:10:17	2	U3243
你可别穿着白衣服误导别人了，糖尿病不去治疗听你的，影响病情你负责吗？	Neutral	2025-09-25 12:46:10	2	U3244
真的那么好吗？血糖高愁死了	Neutral	2025-09-25 11:31:22	2	U3245
我90斤 就是尿特别多，出门就要找厕所的那种，也不爱喝水，一喝水就跑厕所厉害了[捂脸]其他目前没啥，也没去过医院，有点低血糖	Neutral	2025-09-25 08:50:30	2	U3246
太对了	Neutral	2025-09-24 10:08:00	2	U3247
今天测测血糖15	Neutral	2025-09-24 08:37:53	2	U3248
[赞][赞][赞][赞][赞][赞][赞][赞]	Neutral	2025-09-23 22:02:46	2	U3249
我算发现了，只要糖尿病的人血脂全高，都有脂肪肝。	Neutral	2025-09-23 15:43:40	2	U3250
真的吗	Neutral	2025-09-23 12:30:56	2	U3251
煮多长时间	Neutral	2025-09-22 22:36:46	2	U3252
希望你不要为了火乱发 毕竟太多人在期待了	Neutral	2025-09-22 12:24:35	2	U3253
我刚去医院查 46.7	Neutral	2025-09-22 02:10:59	2	U3254
[抱抱你]	Neutral	2025-09-22 01:20:53	2	U3255
确实是很好	Neutral	2025-09-20 22:24:10	2	U3256
我是很扎心了，四五年了，今天空腹14，饭后22，肾区还有些难受，我开始吃药，饭后还运动，我就不信了，活不到88吗，拼了	Neutral	2025-09-20 21:58:42	2	U3257
取关[打脸]	Neutral	2025-09-20 20:49:21	2	U3258
[赞][赞][赞][呲牙][呲牙]	Neutral	2025-09-20 17:12:10	2	U3259
看着医生这手舞足蹈的就害怕 是医生吗	Neutral	2025-09-20 13:15:14	3	U3260
胰岛素释放试验 和 C肽释放试验 同时做的意义是啥？多收钱吗？ 前面整个都说的很好，最后来一句，你这帽子是摘不掉了? 要不要这么让人绝望? 这种只是抵抗加延迟，胰岛功能正常，很容易逆转的。怎么就摘不掉了。	Neutral	2025-09-05 11:20:45	2	U3261
啥意思😳那我这个空腹血糖6.08，糖化5.5，空腹c肽1.25，参考值是0.37～1.47。空腹胰岛素112，参考值17.8～173。餐后两小时血糖7.59 餐后两小时c肽3.15，参考值0.37～1.47 餐后两小时胰岛素374，参考值17.8～173 我这是抵抗吗？	Neutral	2025-09-11 14:49:36	2	U3262
糖友们加油一起努力………	Neutral	2025-09-29 22:16:21	2	U3237
这时赶快锻炼，消耗细胞内的糖。这不是胰岛素抵抗，是细胞抵抗糖，胰岛素分泌多了，但细胞不打开阀门，让糖进入细胞	Neutral	2025-08-03 04:00:24	2	U3235
我空腹一直不到5，才4点多，但是糖化血红蛋白一直5.6，5.7，已经到了糖前期，我怀疑肯定是我餐后血糖高。身边还有空腹一直6点多糖前期，但是糖化血红蛋白5.0正常，和我正好相反[尬笑]	Positive	2025-09-15 14:49:16	2	U3208
其实测餐一和餐二是最关键的，很多糖前期的人只测空腹和糖化会不准确。我上个月查的空腹4.8，糖化5.3，看起来是正常的，我戴动态血糖仪就能看到我餐一和餐二都不达标	Neutral	2025-07-19 23:48:47	2	U3234
唉…每个人有每个人的命运！评论区太多人言之凿凿 可叹	Neutral	2025-09-28 20:57:21	2	U3209
医生我是二型，有遗传史，吃云南的草药效果不错，现在每天打卡，目前血糖还没有达标，她那边说可以根治，要是真的可以去看看吗	Neutral	2025-08-15 09:10:53	2	U3210
你们胰岛素抵抗特别容易饿怎么办， 说是运动改善但是 去动一下 很快就饿了 你就必须再吃 不吃不行，感觉有点进入恶性循环了	Neutral	2025-09-13 12:40:44	2	U3211
我就是胰岛素12，糖5.6，餐前都正常，餐后高，高峰都在2小时，糖11.8胰岛素108，3小时后糖7.8，胰岛素48。还没去医院找大夫看，	Neutral	2025-10-04 13:46:23	2	U3212
这医生太优秀了，不厌其烦的各种解释，从来没有遇到过这么好的医生[比心][比心][比心]	Positive	2025-08-28 10:53:56	3	U3213
一看岁数人家已经75了，超过了屏幕前99%的人	Neutral	2025-08-23 10:34:23	2	U3214
帽子摘不掉了这种话说得极不负责任，trash	Neutral	2025-09-05 11:28:59	2	U3215
空腹4.4有点低不[蕉绿]	Neutral	2025-10-05 16:19:48	2	U3216
现在的医生不和你说这么多，反正超过数值就叫你吃药，然后就叫你走人，看下一个[捂脸]	Neutral	2025-12-06 21:52:28	3	U3217
胰岛素抵抗就相当于同一种药吃多了产生耐药性一个道理，对吧？那从理论上讲，所有人都有可能产生胰岛素抵抗哦？因为胰腺始终都是分泌的同一种胰岛素。	Neutral	2025-09-15 18:14:00	2	U3218
什么都懂，糖尿病就是攻克不了	Neutral	2025-10-04 17:01:41	2	U0011
如果仅仅是一小部分人在标准之内，会不会是标准太严了？	Neutral	2025-09-12 18:28:45	2	U3219
奉劝大家，别信体检报告上的空腹，一定要自己测餐后	Neutral	2025-09-20 07:11:07	2	U3220
[爱心] 这种情况说明 糖代谢功能在下降。 最低也要按早期糖尿病看待。 要控制饮食，多运动。 过段时间再复查比较。[爱心]	Neutral	2025-08-25 17:33:45	2	U3221
胰岛素抵抗，已经很幸福了。还有逆转的可能，加油[666]	Neutral	2025-08-18 23:43:55	2	U3222
糖尿病，不是因为碳水吃多了，糖尿病是身体缺碳水[看]	Neutral	2025-08-12 18:17:32	2	U3223
测了胰岛素抗体，C肽，血清胰岛素，都尚在正常范围内[感谢]	Neutral	2025-08-28 16:12:39	2	U3224
全国几亿人都是唐前妻，怕啥子？	Neutral	2025-09-27 20:23:33	2	U3225
我一直觉得空腹喝糖水不太科学[捂脸]	Neutral	2025-09-24 14:34:37	2	U3226
你让那个医生也喝糖水试试，不比你高都见鬼了	Neutral	2025-09-08 16:09:41	2	U3227
这才是医生该做的，我们这边哪有这么细心的医生，做了个血糖就随意开药，吃了快十年也没什么变化，现在不吃药自己调整饮食完全正常，自己的梦自己园吧	Neutral	2025-08-19 18:27:29	3	U3228
完了。帽子戴上了。要减肥。超重了三四十斤	Neutral	2025-11-28 20:11:26	2	U3229
我吃了一根香蕉，血糖飙到了9.0.一个半小时下到了4.4	Neutral	2025-10-04 09:09:26	2	U3230
空腹5.6，糖化5.4是什么阶段?	Neutral	2025-10-01 07:35:00	2	U3231
拜求一下懂行的，这是做的什么检查？我也想去做一个	Neutral	2025-09-30 20:40:41	2	U3232
我空腹医院5.8，餐后没测过[捂脸]感觉也不低	Neutral	2025-09-29 20:11:23	2	U3233
这两个是喝糖水检测的吗	Neutral	2025-09-29 08:40:26	2	U3263
不需要治疗	Neutral	2025-09-28 21:42:14	2	U3236
我也是餐后高	Neutral	2025-09-27 17:14:42	2	U3264
我不敢抽血 我直接控糖行不[泣不成声]	Neutral	2025-09-27 11:12:28	2	U3294
好焦虑[捂脸]	Neutral	2025-09-27 09:34:47	2	U3296
为什么抵抗呢？	Neutral	2025-09-27 08:24:53	2	U3297
就是我	Neutral	2025-09-26 21:18:12	2	U3298
11.1不是还要伴有三多一少吗？到底听谁的[裂开]	Neutral	2025-09-26 20:45:14	2	U3299
餐前测得5.6，餐后俩小时测得5.1是什么情况有人懂吗[听歌]	Neutral	2025-09-25 23:47:07	2	U3300
空腹OK也可能他头一天晚上没吃饭[呲牙]	Neutral	2025-09-25 21:16:05	2	U3301
我是餐一 10 点多，餐二 9 点多，空腹正常，	Neutral	2025-09-25 15:04:51	2	U3302
我的情况一样，空腹糖化都正常，餐后能上12[捂脸]	Neutral	2025-09-23 23:53:01	2	U3303
我确诊糖尿病了，空腹不高，餐后高	Neutral	2025-09-21 16:48:01	2	U3304
低血糖有糖尿病吗	Neutral	2025-09-19 20:26:10	2	U3305
那我这个算啥	Neutral	2025-09-18 21:16:33	2	U3306
都75岁了。。随意吧	Neutral	2025-09-18 19:42:13	2	U3307
餐后自己扎手指测准确吗？	Neutral	2025-09-18 17:12:33	2	U3308
现在都说餐几，以前都是测空腹，餐后高空腹也会高	Neutral	2025-09-18 14:41:24	2	U3309
现在糖尿病真的多的。	Neutral	2025-09-17 11:19:09	2	U3310
@阿孟阿圆有棵葡萄树 我也想去检查一下餐后的糖代了	Neutral	2025-09-16 21:03:13	2	U3311
空腹 5.1 半小时 16 2 小时 6.1[我想静静][我想静静][我想静静][我想静静] 糖了[我想静静]	Neutral	2025-09-16 08:11:56	2	U3312
帽子是带上了，甩不掉了	Neutral	2025-09-15 16:04:50	2	U3313
什么科查呀	Neutral	2025-09-15 12:50:33	2	U3314
空腹10.4属于糖尿病吗	Neutral	2025-09-15 12:13:32	2	U3315
我的和这个一样一样滴	Neutral	2025-09-15 11:05:06	2	U3316
确诊糖尿病需要做那些检查？？？	Neutral	2025-09-12 16:16:25	2	U3317
这个要做什么检查？这检的是糖耐吗？	Neutral	2025-09-12 14:20:32	2	U3318
@冷若冬瓜 知道了嗎	Neutral	2025-09-10 17:33:58	2	U3319
空腹5.8，餐1，6.2。餐2，5.4正常吗？	Neutral	2025-09-09 12:19:09	2	U3320
这样正常吧？早餐吃的馄饨	Neutral	2025-09-09 09:29:53	2	U3295
因为你餐一餐二高	Neutral	2025-09-08 10:46:02	2	U3293
喝那么多糖正常也高	Neutral	2025-09-06 16:23:32	2	U3266
我就是这样	Neutral	2025-09-06 13:43:12	2	U3292
[赞]	Neutral	2025-09-06 08:24:34	2	U3267
胰岛素抵抗，减肥呀	Neutral	2025-09-04 22:52:47	2	U3268
空腹正常不能说是糖尿病	Neutral	2025-09-04 22:04:44	2	U3269
昨天吃了永和大王的卤肉饭，峰值13.7，2小时开始狂飙。	Neutral	2025-09-04 10:52:33	2	U3270
我就是空腹正常，餐一最高不到12，餐二8左右。现在控制主食的量就没啥问题。	Neutral	2025-09-03 08:55:37	2	U3271
	Neutral	2025-09-01 08:14:56	2	U3272
测糖化就行了吧[尬笑]	Neutral	2025-08-31 14:03:57	2	U3273
C肽是什么？	Neutral	2025-08-29 10:32:17	2	U3274
早上空腹5.64，是不是高了，第一次查，还没查过餐后	Neutral	2025-08-28 16:21:09	2	U3275
我这个也危险了	Neutral	2025-08-27 08:27:16	2	U3276
做这些检查要多少钱	Neutral	2025-08-26 20:08:08	2	U3277
我也是糖尿病了	Neutral	2025-08-25 23:41:01	2	U3278
糖化血红蛋白 是金标准	Neutral	2025-08-24 19:13:42	2	U3279
这个是做的什么检查可以确诊	Neutral	2025-08-23 12:32:16	2	U3280
都75了，爱咋咋的吧	Neutral	2025-08-21 22:17:05	2	U3281
胰岛素抵抗不是能好的吗？这就确诊糖尿病吗？有点不太懂	Neutral	2025-08-21 16:03:25	2	U3282
同糖耐量受损可以逆转吗	Neutral	2025-08-21 15:05:38	2	U3283
这是什么检查	Neutral	2025-08-21 09:57:56	2	U3284
哎！我空腹能到九点多，餐后两小时6.7人都整神了	Neutral	2025-08-20 18:46:05	2	U3285
我餐二就比餐一高，我是不是糖尿病了	Neutral	2025-08-19 21:51:28	2	U0116
结果单医生从来没给我解读过，就给你开单开药	Neutral	2025-08-19 20:43:11	3	U3286
直接查糖化血红蛋白不就得了	Neutral	2025-08-15 22:01:17	2	U3287
我的[捂脸]	Neutral	2025-08-14 17:38:52	2	U3288
糖尿病被妖魔化了，慢性病，不可怕，控製食量，按時吃藥，正常有規律的去生活就行了，越怕越控越難控製血糖的。	Neutral	2025-08-13 21:39:06	2	U3289
空腹血糖5-6之间，有个会不会得糖尿病	Neutral	2025-08-12 20:38:04	2	U3290
请问，我的这个应该应该如果解决？	Neutral	2025-08-12 10:30:14	2	U3291
有医生说要验一个c肽和胰岛素的	Neutral	2025-08-12 09:52:37	3	U3265
这是一型二型啊	Neutral	2025-08-08 15:25:55	2	U3206
能通过运动改变吗	Neutral	2025-08-07 16:31:08	2	U3149
	Neutral	2025-08-07 12:44:38	2	U3205
制造焦虑者	Neutral	2025-08-07 11:21:48	2	U3122
从吃第一口开始 2 小时。还是吃完饭后两小时	Neutral	2025-08-07 10:42:44	2	U3123
升了以后他会降下去。也有问题吗	Neutral	2025-08-07 10:40:08	2	U3124
这医生吓人，给人带上帽子	Neutral	2025-08-04 22:13:09	3	U0031
高那点没事，别听医生吓人	Neutral	2025-08-04 22:10:51	2	U0031
早上起床空腹8，高不高？	Neutral	2025-08-03 21:26:39	2	U3125
前年空腹血糖4.1，去年4.3，今年4.6，	Neutral	2025-08-03 19:02:28	2	U3126
糖耐？	Neutral	2025-08-03 16:33:01	2	U3127
我的很奇怪啊，空腹140，两小时后是92	Neutral	2025-08-02 22:55:00	2	U3128
没法活了。[捂脸]	Neutral	2025-08-02 19:28:44	2	U3129
这是检查的什么项目	Neutral	2025-08-02 13:07:37	2	U3130
那不是要检查很多次	Neutral	2025-08-02 06:34:08	2	U3131
我空腹4.6餐后2小时7.1要不要吃药?[捂脸]	Neutral	2025-08-02 06:34:06	2	U0033
不是说4倍吗？	Neutral	2025-08-01 10:56:28	2	U3132
血糖是波动的。我的空腹十几年前5.5，现在住院量两次次都是4.4左右。现在又测过5.2	Neutral	2025-08-01 06:03:22	2	U3133
一样，我一直餐前正常，没测过餐后，其实糖尿病几年了没发现，餐后13.3。	Neutral	2025-07-31 14:33:36	2	U3134
我饭后1小时候是6点，	Neutral	2025-07-31 13:19:18	2	U3135
进餐顺序影响很高好吧	Neutral	2025-07-31 00:24:40	2	U3136
从来没这么查过，空腹4.1正常吗	Neutral	2025-07-30 14:22:27	2	U3137
十个医生十个解释	Neutral	2025-09-09 10:39:36	3	U0085
糖尿病人的帽子是可以去掉的，医生给大家科普了个误区[呲牙]	Neutral	2025-09-08 10:02:10	2	U3138
分析的非常到位，非常有耐心的医生[赞][赞][赞][赞][赞]，如果每个医生都能像你一样看病，世界上就没有医患矛盾的[666][666][666]	Neutral	2025-09-07 10:03:53	3	U3139
什么原因造成济康	Neutral	2025-09-07 07:53:11	2	U3140
看着这驼峰跟好氧曝气曲线似的[泪奔]，应该是2个峰，变成1个峰了[泪奔]	Neutral	2025-09-06 22:33:54	2	U3141
肌少症，延迟问题不大	Neutral	2025-09-17 19:15:42	2	U3142
帽子还能摘掉，，，就是死了后	Neutral	2025-09-04 12:23:40	2	U3143
啥都说的头头是道 就是治不了[捂脸]	Neutral	2025-09-03 15:48:45	2	U3144
希望看病都遇到这么好的医生	Neutral	2025-09-02 23:32:53	3	U3145
虽然已经胰岛素抵抗吃药了，今天总算听这位医生讲明白了	Neutral	2025-09-01 23:24:40	2	U3146
	Neutral	2025-09-01 21:23:16	2	U3121
这个很正常啊	Neutral	2025-09-01 14:41:13	2	U3119
你不用给他解释，直接让他饿肚子和跑步	Neutral	2025-08-29 18:35:48	2	U3092
我空腹和糖化都正常的，医生让不用查餐二，我怕死，一定要查，医生就让测个指尖血就行，所以餐二没有抽静脉血，好么，餐二8.8[捂脸]	Neutral	2025-08-29 09:29:05	3	U3118
不严重，我26[害羞]	Neutral	2025-08-25 22:20:48	2	U3093
还有正常人吗？	Neutral	2025-08-25 08:14:48	2	U3094
可以开始自己控制了	Neutral	2025-08-24 19:22:37	2	U3095
空腹3.7餐二5.2	Neutral	2025-08-24 09:31:39	2	U3096
空腹胰岛素虽然95在正常范围内，但是属于胰岛素抵抗，	Neutral	2025-08-21 15:34:18	2	U3097
网上说什么的都有，要去医院看，医生怎么说怎么做就是了。一个感冒网上都可以讲成癌症。	Neutral	2025-08-21 15:29:58	3	U3098
这就把帽子戴上啦！好家伙又一个长期客户[捂脸]	Positive	2025-08-21 09:50:39	2	U3099
让他开诊断 办慢病	Neutral	2025-08-20 14:05:05	2	U3100
这个能逆转摘掉帽子的	Neutral	2025-08-19 22:08:56	2	U3101
餐一餐二和吃的东西有关，有的食物升糖高	Neutral	2025-08-19 17:46:35	2	U3102
这么来讲空腹意义不大不用测了	Neutral	2025-08-13 21:06:20	2	U3103
空腹7.5[黑脸]	Neutral	2025-08-11 03:56:56	2	U3104
11.3糖化	Neutral	2025-08-09 21:17:04	2	U3105
空腹4.2，饭后没测过	Neutral	2025-08-06 21:54:17	2	U3106
75了，管它干啥，主食少吃点，加煮蛋鸡胸肉蔬菜	Neutral	2025-08-04 19:48:45	2	U3107
全国统一做这个检查结果估计会很恐怖。	Neutral	2025-08-02 23:35:11	2	U3108
胰岛素是15倍左右，C肽是5倍多，说明肝功能有问题了。	Neutral	2025-07-31 23:19:34	2	U3109
今天一个红糖馒头把血糖整到11.5。运动了一下餐二恢复到6.0[流泪][流泪]再也不敢放肆了	Neutral	2025-07-31 19:59:35	2	U3110
胰岛素抵抗	Neutral	2025-07-29 18:02:21	2	U3111
空腹8.9[流泪]	Neutral	2025-07-29 17:54:06	2	U3112
6以上就是了吧[看]	Neutral	2025-07-29 13:04:11	2	U3113
我空腹6.01，好怕啊。	Positive	2025-07-28 21:31:32	2	U3114
我高峰5.5正常吗	Neutral	2025-07-28 21:20:49	2	U3115
我空腹能到7，饭后两小时5.2[泪奔]	Neutral	2025-07-27 18:49:06	2	U3116
我感觉自己也过不了糖耐，所以一直不敢去查	Neutral	2025-07-24 22:03:40	2	U3117
我今早空腹7.5，我真崩溃，一天心情都不好	Neutral	2025-07-24 09:38:08	2	U3147
我c肽2点多	Neutral	2025-07-24 00:16:06	2	U3120
要是2小时11.02咋整[捂脸]	Neutral	2025-07-21 00:20:31	2	U3148
三个小时还算正常啊！只是降的慢而已，降快了也不好啊！	Neutral	2025-07-20 23:27:55	2	U3178
就像我 空腹5.1 糖化5.6 餐后2个小时都是正常 但是胰岛功能已经开始出问题了	Neutral	2025-07-20 23:00:12	2	U3180
我空腹6.4，餐后6.1[捂脸]，不知道什么情况	Neutral	2025-07-20 17:12:07	2	U3181
和我不谋而合 关键点: 1 这样动作连续10分钟 做三组 间休60-90秒 2 手里拿个1-2斤的小哑铃 适合膝盖 脚踝有病人群 脚落地要轻	Neutral	2025-09-29 14:42:26	2	U3182
这种行为不是绝对的，因为而已，我已试过多次了，望不要被忽悠了，因为这毛病乃世界医学史上的难题，至今也没有一个满意的答案，手段还是头痛医头，脚痛医脚，现在年纪不轮，病死的较有，俗话说，什么病不死人那？	Neutral	2025-07-19 06:31:17	2	U3183
运动提高代谢，代谢会降糖降血脂，总之一句话，少吃多运动，没错。昨天听一个领导说他骨质疏松，经过一两年慢跑都正常了	Neutral	2025-07-16 09:00:11	2	U3184
血糖值都不知道哪个时间段准确了，昨天娃生日，晚上九点吃了点蛋糕，还熬夜了，夜里12 点半测血糖，既然才6.9.昨晚两点才睡。早上六点空腹测又是6，有的时候嘴巴控制的特别好，血糖值还不理想，我的天啊，我都开始怀疑自己是不是糖尿病患者了，是不是医生误诊[灵机一动]	Neutral	2025-07-22 08:55:22	2	U3185
一切挺其自然，我早上四点看到就出来练，练了五分钟就休息了，省省再练。练练肯定好一点，但不可太累。只要心态好点，一切多不是太大回题，。这么舒服这么过，想吃就吃想做就做想玩就玩，一切多在自然中，硬迫，未见得长寿。	Positive	2025-08-17 04:44:47	2	U3186
糖=热量，消耗热量就会降糖。热量大多数通过呼吸排出，剧烈运动会增加心率，心跳快呼吸就会加速，呼吸快了就会降糖快。[捂脸]	Neutral	2025-07-20 12:06:17	2	U3187
真棒[感谢][比心][鼓掌]	Positive	2025-11-15 03:03:44	2	U3188
后面的帅哥不准笑，忍住[捂脸]	Neutral	2025-12-13 22:07:37	2	U3189
@	Neutral	2025-10-31 17:55:12	2	U3190
转给同事，让他练[赞]	Neutral	2025-07-17 10:57:28	2	U3191
收藏从未停止过，行动从未开始过[呲牙]	Neutral	2025-08-13 17:26:44	2	U3192
@[赞][赞][赞][赞]	Neutral	2025-12-03 06:04:40	2	U3193
可以试试看	Neutral	2025-08-23 12:10:43	2	U3194
人啦来到这个世上，这也不能吃那也不能碰，每张颤颤巍巍小心翼翼的活着，你活到了100岁，其实你是来到这世上受了100年的苦。当你来到这个世上，该吃吃该喝喝，每天尽情享受生活，你活到60岁死了，你来世上享了60年的福	Neutral	2025-07-31 17:50:52	2	U3195
@	Neutral	2025-08-25 13:17:50	2	U3196
好真的[赞][赞][赞]	Neutral	2025-07-27 22:17:42	2	U3197
一直坚持	Neutral	2025-08-08 11:13:14	2	U3198
每个人的运动锻炼方式不一样，根据个人适当选择。多方面结合，因为有衰老失调，个人习惯，情感方面，内外环境影响等等。比较完美的还是中医综合来	Neutral	2025-07-25 18:50:12	2	U3199
收藏派	Neutral	2025-08-03 04:28:51	2	U3200
@[赞][赞][赞][赞][赞][赞]	Neutral	2025-07-18 15:55:39	2	U0118
收藏永不停止，行动从未开始[尬笑][尬笑][尬笑]	Neutral	2025-08-07 23:54:04	2	U3201
一直在收藏……[坏笑]	Neutral	2025-07-15 11:39:06	2	U3202
我是下午容易饿，中午吃饱了，到了四点左右就会觉得好饿。但是早餐后和晚餐后不会，为啥呢	Neutral	2025-08-01 09:17:43	2	U3203
一看就会，一学就废	Neutral	2025-07-18 13:50:39	2	U3204
空腹糖10.5	Neutral	2025-07-27 23:23:18	2	U3179
没必要严格按照这个所谓的糖尿病医生三个动作降糖，其实只要有一定的运动量都可以降糖。	Neutral	2025-07-18 20:24:47	2	U1926
收藏和转发15.5w[泪奔]	Neutral	2025-07-17 09:33:15	2	U3150
[抠鼻]告诉大家 他们自己也有糖尿病 而且自己下班喝饮料 喝奶茶	Neutral	2025-07-17 17:25:59	2	U3176
每个都学[泪奔]就是不动	Neutral	2025-07-17 06:37:37	2	U3151
[流泪]	Neutral	2025-11-25 20:38:18	2	U0109
[赞][捂脸]	Neutral	2025-11-25 20:38:04	2	U0109
请问一下饭后运动吗？	Neutral	2025-10-21 11:55:32	2	U3152
为什么我戒烟，减肥，控制饮食的同时得了糖尿病？？？？？	Neutral	2025-10-20 12:25:34	2	U3153
@	Neutral	2025-10-19 19:54:03	2	U3154
一套下了多长时间啊	Neutral	2025-10-19 16:56:51	2	U3155
[西瓜][西瓜][西瓜][西瓜][西瓜][斜刘海]	Neutral	2025-10-18 15:35:01	2	U3156
有没有餐后17点多的	Neutral	2025-10-16 20:20:12	2	U0007
这个每天做多久	Neutral	2025-10-14 20:36:52	2	U3157
我进厂打螺丝，血糖稳稳的[尬笑][尬笑][尬笑]	Neutral	2025-10-12 12:18:23	2	U3158
向医生学习，控制好血糖[感谢][感谢][感谢][感谢][感谢][感谢]	Neutral	2025-10-12 08:29:30	2	U0112
[赞][赞][赞]	Neutral	2025-10-12 06:20:26	2	U3159
感谢医生科普[赞][赞][赞]	Neutral	2025-10-11 20:19:10	3	U3160
[赞][赞][赞][赞][赞][赞][赞][赞][赞][赞][赞][赞][赞][赞][赞][赞][赞]	Neutral	2025-10-11 16:21:11	2	U3161
这些医生应该永远不会得糖尿病吧[捂脸]	Neutral	2025-10-11 15:14:35	3	U3162
空腹6.43[笑哭]吃药吃得想吐 还是坚持运动 控制饮食	Neutral	2025-10-11 08:42:11	2	U3163
一人一个说法不知道听谁的好[捂脸][捂脸][捂脸][捂脸]	Neutral	2025-10-11 07:29:04	2	U3164
要做多长时间	Neutral	2025-10-11 07:07:36	2	U3165
三个动作多少分钟？	Neutral	2025-10-10 15:47:53	2	U3166
[赞][赞][赞][赞][赞]	Neutral	2025-10-10 12:19:23	2	U3167
我以前12.2[玫瑰]现在5.1了 过程太苦了	Neutral	2025-10-10 11:18:03	2	U3168
什么时候做	Neutral	2025-10-10 10:19:44	2	U3169
我之前是12个现在是5.1左右的很知足[赞]	Neutral	2025-10-10 09:28:20	2	U3170
来和我拨甘蔗叶，绝对比这个动作有效。	Neutral	2025-10-10 08:42:35	2	U3171
需要做多长时间	Neutral	2025-10-10 07:36:04	2	U3172
[赞][赞][赞]	Neutral	2025-10-10 07:10:56	2	U3173
哈哈！要在没病的时候坚持锻炼身体才是最佳的，你有没有发现，绝大数人等病了想去运动，而此刻身体都感觉无力运动[呲牙]	Neutral	2025-10-10 03:16:49	2	U0033
[赞][赞][赞][鼓掌][鼓掌][鼓掌][玫瑰][玫瑰][玫瑰]	Neutral	2025-10-09 20:52:28	2	U3174
	Neutral	2025-10-09 16:56:31	2	U0081
这个太快了，好累呀	Positive	2025-10-09 13:31:59	2	U3175
[赞][赞][赞][赞][玫瑰][玫瑰][玫瑰][玫瑰][爱心][爱心][爱心][爱心]	Neutral	2025-10-09 05:39:40	2	U2160
深蹲+垫脚[赞]	Neutral	2025-10-09 01:11:19	2	U1927
在学了 希望有用	Neutral	2025-10-08 18:01:04	2	U1580
我7`8，等还完贷款就去这样走路	Neutral	2025-10-08 08:41:52	2	U1925
一天运动多少时间呢	Neutral	2025-10-08 07:51:40	2	U0677
我教给我老婆了，她看都不看一眼！整天就刷一些毒鸡汤，	Neutral	2025-10-08 07:03:07	2	U0678
每天练多长时间？	Neutral	2025-10-07 21:13:27	2	U0679
今天来月经弄不了，等我好了来	Neutral	2025-10-07 09:00:52	2	U0680
饭前饭后？多少次？多长时间啊？	Neutral	2025-10-06 07:44:05	2	U0681
这个要怎么样才能下载呀？	Neutral	2025-10-05 21:06:52	2	U0682
[666][666][666][666][666][666]	Neutral	2025-10-05 17:28:46	2	U0683
每个动作做多少分钟，做多少个	Neutral	2025-10-05 15:31:38	2	U0684
我空腹都八点多，现在吃药在调理中	Neutral	2025-10-05 03:21:41	2	U0685
糖尿病好完得了神精病	Neutral	2025-10-04 18:51:09	2	U0686
我是走路大胯疼。大夫让少走路少站立。可我不动血糖又降不下来[闭嘴]	Neutral	2025-10-04 09:45:03	2	U0687
	Neutral	2025-10-04 08:02:23	2	U0688
也没说这个饭前还是饭后锻炼	Neutral	2025-10-04 07:14:00	2	U0689
我空腹测5.4	Neutral	2025-10-03 12:45:31	2	U0690
抖音上的降糖操五花八门！所有的降糖操练一遍啥活都不用干也要练几年！练成了葵花宝典都不是对手[呲牙][捂脸]	Neutral	2025-10-03 07:58:37	2	U0691
	Neutral	2025-10-03 06:49:50	2	U0692
[赞][赞][赞]	Neutral	2025-10-02 19:17:56	2	U0693
[赞][赞][赞][赞][赞][赞]	Neutral	2025-10-02 04:59:57	2	U0694
这个一天几次，一次好久	Positive	2025-10-01 19:14:39	2	U0695
从16回到5.2，正常吃饭了[玫瑰]	Neutral	2025-10-01 15:52:49	2	U0696
分享下吧	Neutral	2025-10-01 09:30:03	2	U0697
你压根就不是糖尿病，血糖高不代表糖化高	Neutral	2025-09-30 13:35:50	2	U0698
真的好用吗	Positive	2025-09-30 13:15:08	2	U0699
我的收藏又多了一个[偷笑][偷笑]	Neutral	2025-09-30 12:56:03	2	U0700
我也这样的帅起来	Neutral	2025-09-30 12:52:32	2	U0701
	Neutral	2025-09-29 20:50:50	2	U0676
很多人以为运动后血糖值是最低[捂脸]大错特错，你睡着的时候血糖值才是最低的	Neutral	2025-09-29 11:09:52	2	U0675
[赞][赞][赞]	Neutral	2025-09-29 07:27:13	2	U0674
你这个视频还要长一点就好了[捂脸]	Neutral	2025-09-29 07:26:59	2	U0673
[赞][赞][赞][赞][赞]	Neutral	2025-09-29 02:00:34	2	U0647
俺婆婆天天刨花生我给她做饭一直不高了	Neutral	2025-09-28 20:29:08	2	U0648
[truncated: 1,934 more rows]
