# Supplementary material for: Topic and sentiment in comments on diabetes-related Douyin short videos: a cross-sectional text-mining study
Source: Research Square preprint supplement (doi:10.21203/rs.3.rs-8464538/v1), 2026-02-02
Supplement: Supplementary file 3 [file 4588df3d11ab9f18caef1d78.xlsx]

## Sheet: Auto-coding review
Video ID	Video title (original)	Quadrant	mDISCERN (SUM)	DCI	Content type (provisional)	Rationale (auto)	URL
V01	好消息！高血压、糖尿病等慢性病用药50%纳入报销。没有健康就没有幸福，总理的话，暖心、给力！	High quality / High dissemination	3	3.91016e+06	Public narrative	policy/news/public-affairs cue	https://www.douyin.com/video/6668134279941344523
V02	糖尿病医生教你三个动作，快速降糖#每天坚持锻炼 #健康科普 #盈康一生 #山西盈康一生总医院 #抖出健康知识宝藏	High quality / High dissemination	3	480410	Health education	education/professional cue	https://www.douyin.com/video/7526818605293702438
V03	随手记录一下糖尿病患者的吃饭日常哈哈哈哈	High quality / High dissemination	4	436830	Experiential sharing	personal experience cue	https://www.douyin.com/video/7529525005827755264
V04	这些无意识的控糖行为，你有吗？	High quality / High dissemination	4	392921	Health education	education/professional cue	https://www.douyin.com/video/7497165828211707155
V05	20岁大学生｜得糖尿病我只用了一个月#控糖 #低血糖 #一型糖尿病 #二型糖尿病#高血糖	High quality / High dissemination	2.5	219498	Experiential sharing	personal experience cue	https://www.douyin.com/video/7404415376873852160
V06	糖尿病少吃这 5 种食物越吃血糖越高#控糖 #糖友 #高血糖	High quality / High dissemination	3	144943	Health education	default	https://www.douyin.com/video/7544189705751907618
V07	自由饮食=适量 可控 血糖满意 又是开开心心的一天呀 #一型糖尿病 #糖友 #糖尿病 #vlog日常 #记录生活	High quality / Low dissemination	3	4711.41	Health education	education/professional cue	https://www.douyin.com/video/7346513525377928448
V08	#糖尿病 #糖友 #内分泌 #抖出健康知识宝藏 #知识分享	High quality / Low dissemination	4	4634.68	Health education	education/professional cue	https://www.douyin.com/video/7524692969968422180
V09	#糖尿病足 #糖尿病并发症 #医学科普 #抖出健康知识宝藏 #创面修复张伟主任	High quality / Low dissemination	4	4182.58	Health education	education/professional cue	https://www.douyin.com/video/7455873180335459593
V10	含有天然胰岛素的十道家常菜，吃得饱控糖好#控糖 #适合糖友的食谱 #含天然胰岛素的蔬菜 #美食教程	High quality / Low dissemination	4	4107.02	Health education	default	https://www.douyin.com/video/7457615181825248570
V11	空腹血糖7点多，是不是糖尿病？下一步怎么办？ #空腹血糖高 #空腹血糖标准 #血糖高怎么控制 #抖出健康知识宝藏 #健康科普破圈计划	High quality / Low dissemination	2.5	3976.25	Health education	education/professional cue	https://www.douyin.com/video/7556840009475624207
V12	不升唐的午餐#糖人饮食#控糖饮食#控糖#控糖饮食法	High quality / Low dissemination	3	3940.91	Health education	education/professional cue	https://www.douyin.com/video/7527974904646536508
V13	#控糖 #控糖饮食 #科普 #涨知识	Low quality / High dissemination	2	147825	Health education	education/professional cue	https://www.douyin.com/video/7547555071602085178
V14	80%的糖尿病，一碗枸杞鸡蛋汤，在家就能调理。 #医学科普 #糖尿病 #中医 #养生 #医学科普	Low quality / High dissemination	2	145605	Health education	education/professional cue	https://www.douyin.com/video/7552016687852260617
V15	糖尿病并没有那么吓人，记住一个老祖宗的土方法！#糖尿病 #血糖高 #消渴症 #干货分享	Low quality / High dissemination	2	132359	Health education	education/professional cue	https://www.douyin.com/video/7513601717351894332
V16	对自身有益的3个动作，抽空也要练#控糖 #中老年锻炼 #居家锻炼 #居家锻炼 #糖友	Low quality / High dissemination	2	130252	Health education	education/professional cue	https://www.douyin.com/video/7487540232053738779
V17	血糖多少说明严重了#糖尿病 #分享知识	Low quality / High dissemination	1	119500	Health education	education/professional cue	https://www.douyin.com/video/7234434031054622007
V18	血糖高不用慌，常按手上一个穴 #高血糖 #在抖音pick你的健康搭子 #医学知识科普 #糖尿病	Low quality / High dissemination	2	116969	Health education	education/professional cue	https://www.douyin.com/video/7545389436792491264
V19	在补气和红色液体的过程中无意间发现糖稳了#亲身经历 #个人经验分享 #糖友 #糖人 #控糖	Low quality / Low dissemination	1	4171.13	Experiential sharing	personal experience cue	https://www.douyin.com/video/7549893025737379130
V20	胰岛素可能很快就要成为历史了！ #糖尿病 #干细胞 #科技 #医疗突破 #健康	Low quality / Low dissemination	2	4015.85	Health education	default	https://www.douyin.com/video/7556117251016199424
V21	当一型糖人打素吃饭被误解…#一型糖尿病 #三诺讲糖 #糖友 #二型糖尿病 #糖尿病	Low quality / Low dissemination	2	3941.75	Health education	default	https://www.douyin.com/video/7356138229550157065
V22	糖尿病之光，明年马上开启“无痛时代”！ #控糖 #营养师 #胰岛素	Low quality / Low dissemination	1	3861.72	Health education	default	https://www.douyin.com/video/7545029174206008627
V23	血糖高可以这样喝 #科普 #中医 #血糖高 #糖尿病 #调理	Low quality / Low dissemination	2	3749.7	Health education	education/professional cue	https://www.douyin.com/video/7555784151190834459
V24	戒掉这6个坏习惯，数值稳稳的#糖尿病 #控糖 #控糖习惯 #糖尿病饮食	Low quality / Low dissemination	2	3366.33	Health education	education/professional cue	https://www.douyin.com/video/7558315268595027235
