# Supplementary material for: Topic and sentiment in comments on diabetes-related Douyin short videos: a cross-sectional text-mining study
Source: Research Square preprint supplement (doi:10.21203/rs.3.rs-8464538/v1), 2026-02-02
Supplement: Supplementary file 4 [file 7b80f14b64df4aebcd48ba61.xlsx]

## Sheet: Sheet1
来源	目标	值
@挺好呀💍	主题2	2
。，	主题2	6
一生平安	主题2	3
丁姐	主题2	3
万事如意	主题2	4
凡尘	主题2	3
妍妍爱生活	主题2	3
幸福	主题2	4
开心	主题2	6
徐女士	主题2	3
摩登	主题2	3
知足常乐	主题2	4
石头	主题2	3
红大侠	主题2	2
组合车服务中心	主题2	3
赖	主题2	3
过好每一天	主题2	2
阳光	主题2	4
陈二姐	主题2	3
