# Supplementary material for: Topic and sentiment in comments on diabetes-related Douyin short videos: a cross-sectional text-mining study
Source: Research Square preprint supplement (doi:10.21203/rs.3.rs-8464538/v1), 2026-02-02
Supplement: Supplementary file 5 [file 982692cd1a439748a07065ac.xlsx]

## Sheet: Sheet1
Keyword (Chinese)	Community ID	Community label
空腹	血糖	25
糖尿病	血糖	16
空腹	糖化	14
控制	饮食	11
医生	血糖	11
糖尿病	饮料	10
控制	空腹	9
空腹	糖尿病	9
医生	空腹	9
糖尿病	胰岛素	9
吃药	糖尿病	7
医生	糖尿病	7
医院	空腹	7
奶茶	饮料	7
糖尿病	老师	7
学生	老师	7
空腹	饮食	6
控制	血糖	6
糖化	血糖	6
吃药	血糖	6
吃药	空腹	6
血糖	降下来	6
胰岛素	血糖	6
医生	吃药	6
血糖	饮食	5
不用	吃药	5
人民币	胰岛素	5
确诊	糖尿病	5
不吃	糖尿病	5
告诉	糖尿病	5
空腹	胰岛素	5
口渴	空腹	5
医生	医院	5
吃醋	吃饭	5
中国	全球	5
糖尿病	高血压	4
患者	糖尿病	4
空腹	血糖高	4
医生	良心	4
害怕	糖尿病	4
体重	糖尿病	4
医院	血糖	4
减肥	饮食	4
控制	糖尿病	4
不失	礼貌	4
减肥	胰岛素	4
口渴	糖尿病	4
奶茶	糖尿病	4
喝酒	抽烟	4
糖尿病	饮食	4
Notes for S2 Table. (1) Co-occurrence was defined at the comment level: if term A and term B appeared in the same valid comment, cooc(A,B) = 1. (2) df(A) and df(B) denote document frequency (numbers of comments containing term A or term B). (3) Lift was computed as Lift(A,B) = N × cooc(A,B) / [df(A) × df(B)], where N = 2,007. Lift > 1 indicates that co-occurrence is more frequent than expected un…
