# Supplementary material for: Topic and sentiment in comments on diabetes-related Douyin short videos: a cross-sectional text-mining study
Source: Research Square preprint supplement (doi:10.21203/rs.3.rs-8464538/v1), 2026-02-02
Supplement: Supplementary file 6 [file a1750b5420d9f40eca9d3999.xlsx]

## Sheet: Sheet1
Sentiment category	n	Mean (chars)	SD	Median (chars)	Q1	Q3	IQR	Min	Max
Negative	20	50.1	52.73	30	15.75	64	48.25	9	228
Neutral	1850	21.08	20.61	15	10	23	13	7	277
Positive	137	33.2	43.45	19	12	35	23	7	310
