# Supplementary material for: Topic and sentiment in comments on diabetes-related Douyin short videos: a cross-sectional text-mining study
Source: Research Square preprint supplement (doi:10.21203/rs.3.rs-8464538/v1), 2026-02-02
Supplement: Supplementary file 7 [file ebd0c9e518916be2b37d8b06.xlsx]

## Sheet: Sheet1
Term (Chinese)	Document frequency (df)	Relative frequency (%)
糖尿病	243	6.17849	6.17849
血糖	166	4.2207	10.3992
空腹	151	3.83931	14.2385
医生	140	3.55962	17.7981
胰岛素	94	2.39003	20.1882
老师	79	2.00864	22.1968
平安	67	1.70353	23.9003
餐后	52	1.32215	25.2225
天天	46	1.16959	26.3921
饮料	46	1.16959	27.5617
医院	45	1.14416	28.7058
泪奔	44	1.11874	29.8246
运动	44	1.11874	30.9433
控制	43	1.09331	32.0366
血糖高	41	1.04246	33.0791
吃饭	39	0.991609	34.0707
吃醋	38	0.966184	35.0369
吃药	37	0.940758	35.9776
饭后	35	0.889906	36.8675
米饭	35	0.889906	37.7574
早上	34	0.86448	38.6219
不吃	33	0.839054	39.461
动作	31	0.788202	40.2492
东西	29	0.737351	40.9865
抱拳	28	0.711925	41.6984
二型	27	0.686499	42.3849
分享	27	0.686499	43.0714
身体	26	0.661073	43.7325
一型	26	0.661073	44.3936
饮食	25	0.635647	45.0292
减肥	25	0.635647	45.6649
糖化	24	0.610221	46.2751
不好	24	0.610221	46.8853
抵抗	24	0.610221	47.4956
苹果醋	24	0.610221	48.1058
点多	23	0.584795	48.6906
泣不成声	23	0.584795	49.2754
越来越	22	0.559369	49.8347
健康	21	0.533944	50.3687
不用	20	0.508518	50.8772
降糖	20	0.508518	51.3857
一个月	20	0.508518	51.8942
口渴	20	0.508518	52.4027
年轻	19	0.483092	52.8858
糖尿病人	19	0.483092	53.3689
控糖	19	0.483092	53.852
总理	18	0.457666	54.3097
请问	18	0.457666	54.7674
奶茶	18	0.457666	55.225
憨笑	18	0.457666	55.6827
